# Supplementary material
Source: publisher figshare collection journal article supplement (https://acs.figshare.com/ndownloader/files/14221328)
Supplement: Supplementary file 1 [file 14221328]

## Sheet: Reflection loss
																			Volume fraction Methanol										Volume fraction Methanol
																			Refractive Index
																			0.637254	0.592537	0.539876	0.484962	0.429511	0.364937	0.288338	0.202084	0.114329		0.637254	0.592537	0.539876	0.484962	0.429511	0.364937	0.288338	0.202084	0.114329
																			1.3407	1.341	1.3411	1.3408	1.3403	1.3394	1.3381	1.3364	1.3346
	mole fraction water	Refractive index	mole fraction methanol	Volume methanol	Volume Water	Volume fraction Methanol	Water MW	MeOH MW	Water Density at 22 C	Methanol Density at 22 C	RI Fit coeff		LED Wavelength nm	LED Intensity Counts	LED Wavelength mm	Rel Energy (intensity/ wavelength)	Power in Window microwatts	RI PMMA	Fresnel Reflection loss										Net power entering liquid, microwatts																				Wavelength nm
	0	1.3264	1	40.4341	0	1	18.0153	32.04	0.9978	0.7924	A0	2.1778	350.5	29.4667	0.3505	84.0704	0.322947	1.51337	0.00366031	0.00364684	0.00364235	0.00365582	0.00367832	0.00371902	0.00377825	0.0038565	0.00394032		0.321765	0.321769	0.32177	0.321766	0.321759	0.321746	0.321726	0.321701	0.321674
	0.0716	1.3288	0.9284	37.539	1.29274	0.966709					A1	0.0061209	351	26.8	0.351	76.3533	0.293303	1.51334	0.00365914	0.00364567	0.00364118	0.00365465	0.00367715	0.00371784	0.00377706	0.00385529	0.0039391		0.292229	0.292233	0.292235	0.292231	0.292224	0.292212	0.292195	0.292172	0.292147		0.613994	0.614002	0.614005	0.613997	0.613983	0.613958	0.613921	0.613873	0.613821		351
	0.1203	1.3303	0.8797	35.5699	2.17202	0.942451					A2	-0.0015004	351.5	35.6667	0.3515	101.47	0.389785	1.51331	0.00365791	0.00364444	0.00363996	0.00365342	0.00367591	0.0037166	0.00377581	0.00385403	0.00393783		0.388359	0.388365	0.388366	0.388361	0.388352	0.388336	0.388313	0.388283	0.38825												352
	0.1612	1.3316	0.8388	33.9161	2.91047	0.920968					A3	0.023678	352	39.1429	0.352	111.201	0.427167	1.51328	0.00365663	0.00364316	0.00363868	0.00365214	0.00367463	0.00371531	0.00377451	0.00385272	0.0039365		0.425605	0.425611	0.425613	0.425607	0.425597	0.42558	0.425555	0.425521	0.425486		0.813964	0.813975	0.813979	0.813968	0.81395	0.813916	0.813868	0.813804	0.813736		353
	0.2145	1.3331	0.7855	31.761	3.8728	0.891317					A4	-0.0042137	352.5	29.5333	0.3525	83.7824	0.32184	1.51325	0.0036553	0.00364184	0.00363736	0.00365081	0.0036733	0.00371397	0.00377316	0.00385136	0.00393513		0.320664	0.320668	0.32067	0.320666	0.320658	0.320645	0.320626	0.320601	0.320574												354
	0.2609	1.3344	0.7391	29.8849	4.71055	0.863839					A5	0.00073417	353	32.6733	0.353	92.559	0.355555	1.51321	0.00365393	0.00364046	0.00363598	0.00364944	0.00367192	0.00371258	0.00377176	0.00384994	0.0039337		0.354255	0.35426	0.354262	0.354257	0.354249	0.354235	0.354214	0.354186	0.354156		0.67492	0.674929	0.674932	0.674923	0.674907	0.67488	0.67484	0.674787	0.67473		355
	0.3054	1.3356	0.6946	28.0855	5.514	0.835891					A6	-4.5042e-05	353.5	30.54	0.3535	86.3933	0.33187	1.51318	0.0036525	0.00363904	0.00363456	0.00364801	0.00367049	0.00371115	0.00377032	0.00384848	0.00393222		0.330658	0.330662	0.330664	0.330659	0.330652	0.330638	0.330618	0.330593	0.330565												356
	0.355	1.3369	0.645	26.08	6.40953	0.80272							354	31.1267	0.354	87.9285	0.337767	1.51314	0.00365103	0.00363757	0.00363309	0.00364654	0.00366902	0.00370967	0.00376882	0.00384697	0.00393069		0.336534	0.336539	0.33654	0.336536	0.336528	0.336514	0.336494	0.336468	0.33644		0.667192	0.667201	0.667204	0.667195	0.66718	0.667152	0.667113	0.66706	0.667004		357
	0.4096	1.3382	0.5904	23.8723	7.39534	0.763483							354.5	28.58	0.3545	80.6206	0.309695	1.5131	0.00364951	0.00363606	0.00363158	0.00364503	0.0036675	0.00370814	0.00376728	0.00384542	0.00392912		0.308564	0.308569	0.30857	0.308566	0.308559	0.308546	0.308528	0.308504	0.308478												358
	0.4584	1.3393	0.5416	21.8991	8.27642	0.725724							355	30.24	0.355	85.1831	0.327221	1.51306	0.00364796	0.0036345	0.00363003	0.00364347	0.00366593	0.00370657	0.0037657	0.00384382	0.0039275		0.326027	0.326032	0.326033	0.326029	0.326021	0.326008	0.325989	0.325963	0.325936		0.634592	0.6346	0.634603	0.634595	0.63458	0.634554	0.634517	0.634467	0.634414		359
	0.4943	1.3398	0.5057	20.4475	8.9246	0.696154							355.5	31.9333	0.3555	89.8265	0.345058	1.51302	0.00364635	0.00363291	0.00362843	0.00364187	0.00366433	0.00370495	0.00376407	0.00384217	0.00392584		0.3438	0.343805	0.343806	0.343801	0.343794	0.34378	0.343759	0.343732	0.343703												360
	0.5604	1.3407	0.4396	17.7748	10.118	0.637254							356	31.4286	0.356	88.2825	0.339127	1.51298	0.00364471	0.00363127	0.00362679	0.00364023	0.00366268	0.0037033	0.0037624	0.00384049	0.00392414		0.337891	0.337895	0.337897	0.337892	0.337885	0.337871	0.337851	0.337825	0.337796		0.681691	0.6817	0.681703	0.681694	0.681678	0.681651	0.68161	0.681557	0.6815		361
	0.6063	1.341	0.3937	15.9189	10.9468	0.592537							356.5	35.24	0.3565	98.8499	0.379721	1.51294	0.00364303	0.00362959	0.00362511	0.00363855	0.003661	0.0037016	0.0037607	0.00383876	0.00392239		0.378337	0.378342	0.378344	0.378339	0.37833	0.378315	0.378293	0.378263	0.378231												362
	0.6562	1.3411	0.3438	13.9013	11.8477	0.539876							357	33.12	0.357	92.7731	0.356377	1.5129	0.00364131	0.00362787	0.0036234	0.00363683	0.00365927	0.00369987	0.00375895	0.00383699	0.00392061		0.35508	0.355084	0.355086	0.355081	0.355073	0.355059	0.355038	0.35501	0.35498		0.733417	0.733427	0.73343	0.73342	0.733404	0.733374	0.73333	0.733273	0.733211		363
	0.704	1.3408	0.296	11.9685	12.7107	0.484962							357.5	29.8266	0.3575	83.4312	0.320491	1.51285	0.00363955	0.00362611	0.00362164	0.00363507	0.00365751	0.0036981	0.00375716	0.00383519	0.00391878		0.319325	0.319329	0.319331	0.319326	0.319319	0.319306	0.319287	0.319262	0.319235												364
	0.7484	1.3403	0.2516	10.1732	13.5124	0.429511							358	31.68	0.358	88.4916	0.33993	1.51281	0.00363776	0.00362432	0.00361985	0.00363328	0.00365571	0.00369629	0.00375534	0.00383335	0.00391692		0.338694	0.338698	0.3387	0.338695	0.338688	0.338674	0.338654	0.338627	0.338599		0.658019	0.658028	0.65803	0.658022	0.658007	0.65798	0.657941	0.657889	0.657834		365
	0.7958	1.3394	0.2042	8.25665	14.3682	0.364937							358.5	30.1467	0.3585	84.0911	0.323026	1.51276	0.00363593	0.0036225	0.00361803	0.00363145	0.00365388	0.00369444	0.00375348	0.00383147	0.00391502		0.321852	0.321856	0.321857	0.321853	0.321846	0.321833	0.321814	0.321789	0.321762												366
	0.8468	1.3381	0.1532	6.19451	15.289	0.288338							359	30.48	0.359	84.9025	0.326143	1.51271	0.00363406	0.00362064	0.00361617	0.00362958	0.00365201	0.00369256	0.00375158	0.00382956	0.00391309		0.324958	0.324962	0.324964	0.324959	0.324952	0.324939	0.32492	0.324894	0.324867		0.64681	0.646818	0.646821	0.646813	0.646798	0.646772	0.646733	0.646683	0.646628		367
	0.8984	1.3364	0.1016	4.10811	16.2206	0.202084							359.5	34.6267	0.3595	96.3191	0.369999	1.51267	0.00363216	0.00361874	0.00361427	0.00362769	0.0036501	0.00369065	0.00374966	0.00382761	0.00391112		0.368655	0.36866	0.368661	0.368656	0.368648	0.368633	0.368611	0.368582	0.368551												368
	0.9455	1.3346	0.0545	2.20366	17.071	0.114329							360	38.9184	0.36	108.107	0.415279	1.51262	0.00363023	0.00361682	0.00361235	0.00362576	0.00364817	0.00368871	0.0037477	0.00382563	0.00390912		0.413772	0.413777	0.413779	0.413773	0.413764	0.413747	0.413723	0.41369	0.413656		0.782426	0.782437	0.78244	0.78243	0.782412	0.78238	0.782334	0.782273	0.782207		369
	1	1.3325	0	0	18.055	0							360.5	36.3133	0.3605	100.73	0.386944	1.51257	0.00362827	0.00361486	0.00361039	0.0036238	0.0036462	0.00368673	0.0037457	0.00382361	0.00390709		0.38554	0.385546	0.385547	0.385542	0.385533	0.385518	0.385495	0.385465	0.385433												370
													361	40.9267	0.361	113.37	0.435499	1.51252	0.00362628	0.00361287	0.00360841	0.00362181	0.00364421	0.00368472	0.00374368	0.00382157	0.00390502		0.43392	0.433925	0.433927	0.433922	0.433912	0.433894	0.433868	0.433835	0.433798		0.81946	0.819471	0.819475	0.819464	0.819445	0.819412	0.819363	0.819299	0.819231		371
													361.5	42.0733	0.3615	116.385	0.447081	1.51247	0.00362426	0.00361085	0.00360639	0.00361979	0.00364218	0.00368268	0.00374163	0.0038195	0.00390292		0.445461	0.445467	0.445469	0.445463	0.445453	0.445435	0.445408	0.445374	0.445336												372
													362	35.1	0.362	96.9613	0.372466	1.51241	0.00362221	0.00360881	0.00360435	0.00361774	0.00364013	0.00368062	0.00373955	0.00381739	0.0039008		0.371116	0.371121	0.371123	0.371118	0.37111	0.371095	0.371073	0.371044	0.371013		0.816577	0.816588	0.816592	0.816581	0.816563	0.816529	0.816481	0.816417	0.816349		373
													362.5	35.3867	0.3625	97.6184	0.37499	1.51236	0.00362014	0.00360674	0.00360227	0.00361567	0.00363805	0.00367853	0.00373744	0.00381526	0.00389864		0.373632	0.373637	0.373639	0.373634	0.373626	0.373611	0.373588	0.373559	0.373528												374
													363	38.96	0.363	107.328	0.412288	1.51231	0.00361803	0.00360464	0.00360018	0.00361356	0.00363594	0.00367641	0.0037353	0.0038131	0.00389646		0.410796	0.410802	0.410803	0.410798	0.410789	0.410772	0.410748	0.410716	0.410681		0.784428	0.784439	0.784443	0.784432	0.784414	0.784383	0.784336	0.784275	0.784209		375
													363.5	46.4533	0.3635	127.795	0.490908	1.51225	0.0036159	0.00360251	0.00359805	0.00361144	0.0036338	0.00367426	0.00373314	0.00381092	0.00389425		0.489133	0.48914	0.489142	0.489135	0.489124	0.489104	0.489075	0.489037	0.488996												376
													364	41.8231	0.364	114.899	0.44137	1.5122	0.00361375	0.00360036	0.0035959	0.00360928	0.00363165	0.00367209	0.00373095	0.00380871	0.00389202		0.439775	0.439781	0.439783	0.439777	0.439767	0.439749	0.439723	0.439689	0.439652		0.928908	0.92892	0.928924	0.928912	0.928891	0.928853	0.928799	0.928726	0.928648		377
													364.5	42.9333	0.3645	117.787	0.452465	1.51215	0.00361157	0.00359819	0.00359373	0.00360711	0.00362946	0.00366989	0.00372874	0.00380647	0.00388976		0.45083	0.450837	0.450839	0.450832	0.450822	0.450804	0.450777	0.450742	0.450705												378
													365	47.7333	0.365	130.776	0.502362	1.51209	0.00360937	0.00359599	0.00359154	0.00360491	0.00362726	0.00366768	0.0037265	0.00380421	0.00388748		0.500549	0.500555	0.500558	0.500551	0.50054	0.500519	0.50049	0.500451	0.500409		0.951379	0.951392	0.951396	0.951383	0.951362	0.951323	0.951267	0.951193	0.951114		379
													365.5	38.7867	0.3655	106.12	0.407646	1.51203	0.00360715	0.00359377	0.00358932	0.00360269	0.00362503	0.00366543	0.00372424	0.00380193	0.00388517		0.406176	0.406181	0.406183	0.406177	0.406168	0.406152	0.406128	0.406096	0.406062												380
													366	42.0667	0.366	114.936	0.441515	1.51198	0.0036049	0.00359153	0.00358708	0.00360044	0.00362278	0.00366317	0.00372196	0.00379963	0.00388284		0.439923	0.439929	0.439931	0.439925	0.439915	0.439897	0.439871	0.439837	0.4398		0.846099	0.84611	0.846114	0.846102	0.846083	0.846049	0.845999	0.845933	0.845863		381
													366.5	44.52	0.3665	121.473	0.466626	1.51192	0.00360264	0.00358927	0.00358482	0.00359818	0.0036205	0.00366089	0.00371966	0.0037973	0.00388049		0.464945	0.464951	0.464953	0.464947	0.464937	0.464918	0.464891	0.464854	0.464816												382
													367	39.1867	0.367	106.776	0.410167	1.51186	0.00360035	0.00358699	0.00358254	0.00359589	0.00361821	0.00365858	0.00371734	0.00379495	0.00387812		0.40869	0.408695	0.408697	0.408692	0.408683	0.408666	0.408642	0.40861	0.408576		0.873635	0.873647	0.873651	0.873639	0.87362	0.873584	0.873533	0.873465	0.873392		383
													367.5	45.3867	0.3675	123.501	0.474416	1.5118	0.00359804	0.00358468	0.00358024	0.00359359	0.0036159	0.00365626	0.00371499	0.00379259	0.00387572		0.472709	0.472715	0.472717	0.472711	0.4727	0.472681	0.472653	0.472616	0.472577												384
													368	43.0667	0.368	117.029	0.449554	1.51174	0.00359572	0.00358236	0.00357792	0.00359127	0.00361357	0.00365392	0.00371263	0.0037902	0.00387331		0.447937	0.447943	0.447945	0.447939	0.447929	0.447911	0.447885	0.44785	0.447812		0.920646	0.920658	0.920662	0.92065	0.92063	0.920592	0.920538	0.920466	0.92039		385
													368.5	39.3867	0.3685	106.884	0.410582	1.51169	0.00359338	0.00358003	0.00357558	0.00358892	0.00361122	0.00365155	0.00371025	0.0037878	0.00387088		0.409107	0.409112	0.409114	0.409108	0.409099	0.409083	0.409059	0.409027	0.408993												386
													369	50.9116	0.369	137.972	0.530002	1.51163	0.00359102	0.00357767	0.00357323	0.00358657	0.00360886	0.00364918	0.00370785	0.00378537	0.00386843		0.528099	0.528106	0.528109	0.528102	0.52809	0.528068	0.528037	0.527996	0.527952		0.937206	0.937218	0.937223	0.93721	0.937189	0.937151	0.937096	0.937023	0.936945		387
													369.5	48.6666	0.3695	131.709	0.505947	1.51157	0.00358864	0.0035753	0.00357086	0.00358419	0.00360647	0.00364678	0.00370544	0.00378293	0.00386597		0.504131	0.504138	0.50414	0.504133	0.504122	0.504102	0.504072	0.504033	0.503991												388
													370	46.5	0.37	125.676	0.482769	1.51151	0.00358625	0.00357291	0.00356847	0.0035818	0.00360408	0.00364437	0.00370301	0.00378048	0.00386348		0.481037	0.481044	0.481046	0.481039	0.481029	0.481009	0.480981	0.480944	0.480903		0.985168	0.985182	0.985186	0.985173	0.985151	0.985111	0.985053	0.984976	0.984894		389
													370.5	42	0.3705	113.36	0.435461	1.51144	0.00358384	0.00357051	0.00356607	0.00357939	0.00360166	0.00364194	0.00370056	0.00377801	0.00386098		0.4339	0.433906	0.433908	0.433902	0.433892	0.433875	0.433849	0.433815	0.433779												390
													371	41	0.371	110.512	0.42452	1.51138	0.00358142	0.00356809	0.00356365	0.00357697	0.00359923	0.0036395	0.0036981	0.00377552	0.00385847		0.422999	0.423005	0.423007	0.423001	0.422992	0.422975	0.42295	0.422917	0.422882		0.856899	0.856911	0.856915	0.856903	0.856884	0.856849	0.856799	0.856732	0.856661		391
													371.5	51.5	0.3715	138.627	0.53252	1.51132	0.00357898	0.00356566	0.00356122	0.00357454	0.00359679	0.00363704	0.00369562	0.00377302	0.00385594		0.530615	0.530622	0.530624	0.530617	0.530605	0.530584	0.530552	0.530511	0.530467												392
													372	48	0.372	129.032	0.495663	1.51126	0.00357653	0.00356321	0.00355878	0.00357209	0.00359433	0.00363457	0.00369313	0.0037705	0.0038534		0.49389	0.493896	0.493899	0.493892	0.493881	0.493861	0.493832	0.493794	0.493753		1.0245	1.02452	1.02452	1.02451	1.02449	1.02444	1.02438	1.0243	1.02422		393
													372.5	43.6666	0.3725	117.226	0.45031	1.5112	0.00357407	0.00356075	0.00355632	0.00356962	0.00359186	0.00363209	0.00369063	0.00376797	0.00385084		0.4487	0.448706	0.448708	0.448702	0.448692	0.448674	0.448648	0.448613	0.448576												394
													373	45.6666	0.373	122.431	0.470303	1.51113	0.00357159	0.00355828	0.00355385	0.00356715	0.00358938	0.00362959	0.00368811	0.00376543	0.00384827		0.468624	0.46863	0.468632	0.468626	0.468615	0.468596	0.468569	0.468533	0.468494		0.917324	0.917336	0.91734	0.917328	0.917308	0.917271	0.917217	0.917146	0.917069		395
													373.5	46	0.3735	123.159	0.473102	1.51107	0.0035691	0.00355579	0.00355137	0.00356466	0.00358689	0.00362708	0.00368559	0.00376288	0.00384569		0.471414	0.47142	0.471422	0.471416	0.471405	0.471386	0.471359	0.471322	0.471283												396
													374	53.9932	0.374	144.367	0.554569	1.51101	0.0035666	0.0035533	0.00354887	0.00356216	0.00358438	0.00362456	0.00368305	0.00376031	0.0038431		0.552591	0.552598	0.552601	0.552593	0.552581	0.552559	0.552526	0.552483	0.552438		1.024	1.02402	1.02402	1.02401	1.02399	1.02395	1.02388	1.02381	1.02372		397
													374.5	57.5067	0.3745	153.556	0.589867	1.51094	0.00356409	0.00355079	0.00354637	0.00355966	0.00358186	0.00362203	0.00368049	0.00375773	0.00384049		0.587765	0.587773	0.587776	0.587768	0.587755	0.587731	0.587696	0.587651	0.587602												398
													375	52.8	0.375	140.8	0.540867	1.51088	0.00356157	0.00354828	0.00354385	0.00355714	0.00357934	0.00361949	0.00367793	0.00375515	0.00383787		0.538941	0.538948	0.53895	0.538943	0.538931	0.53891	0.538878	0.538836	0.538791		1.12671	1.12672	1.12673	1.12671	1.12669	1.12664	1.12657	1.12649	1.12639		399
													375.5	54.9467	0.3755	146.329	0.562107	1.51081	0.00355904	0.00354575	0.00354133	0.00355461	0.0035768	0.00361694	0.00367536	0.00375255	0.00383525		0.560107	0.560114	0.560117	0.560109	0.560097	0.560074	0.560042	0.559998	0.559952												400
													376	46.0533	0.376	122.482	0.470502	1.51075	0.0035565	0.00354322	0.0035388	0.00355207	0.00357425	0.00361438	0.00367278	0.00374994	0.00383261		0.468828	0.468834	0.468837	0.46883	0.46882	0.468801	0.468773	0.468737	0.468698		1.02894	1.02895	1.02895	1.02894	1.02892	1.02888	1.02882	1.02874	1.02865		401
													376.5	46.9467	0.3765	124.692	0.478991	1.51069	0.00355395	0.00354067	0.00353625	0.00354952	0.0035717	0.00361181	0.00367019	0.00374732	0.00382997		0.477289	0.477295	0.477297	0.477291	0.47728	0.477261	0.477233	0.477196	0.477157												402
													377	56.4533	0.377	149.744	0.575223	1.51062	0.00355139	0.00353812	0.0035337	0.00354697	0.00356914	0.00360923	0.00366759	0.0037447	0.00382731		0.57318	0.573188	0.57319	0.573182	0.57317	0.573147	0.573113	0.573069	0.573021		1.05047	1.05048	1.05049	1.05047	1.05045	1.05041	1.05035	1.05027	1.05018		403
													377.5	53.08	0.3775	140.609	0.540134	1.51056	0.00354883	0.00353556	0.00353114	0.0035444	0.00356656	0.00360665	0.00366499	0.00374206	0.00382465		0.538217	0.538224	0.538227	0.53822	0.538208	0.538186	0.538155	0.538113	0.538068												404
													378	54.12	0.378	143.175	0.549989	1.51049	0.00354626	0.00353299	0.00352858	0.00354183	0.00356398	0.00360405	0.00366237	0.00373942	0.00382198		0.548038	0.548046	0.548048	0.548041	0.548029	0.548007	0.547975	0.547932	0.547887		1.08626	1.08627	1.08627	1.08626	1.08624	1.08619	1.08613	1.08605	1.08596		405
													378.5	64.1067	0.3785	169.37	0.650617	1.51042	0.00354368	0.00353042	0.003526	0.00353925	0.0035614	0.00360145	0.00365975	0.00373677	0.0038193		0.648311	0.64832	0.648323	0.648314	0.6483	0.648274	0.648236	0.648186	0.648132												406
													379	71.0133	0.379	187.37	0.719761	1.51036	0.00354109	0.00352783	0.00352342	0.00353667	0.00355881	0.00359885	0.00365712	0.00373412	0.00381662		0.717213	0.717222	0.717225	0.717216	0.7172	0.717171	0.717129	0.717074	0.717014		1.36552	1.36554	1.36555	1.36553	1.3655	1.36544	1.36536	1.36526	1.36515		407
													379.5	67.1733	0.3795	177.005	0.679943	1.51029	0.0035385	0.00352525	0.00352084	0.00353408	0.00355621	0.00359623	0.00365449	0.00373146	0.00381393		0.677537	0.677546	0.677549	0.67754	0.677525	0.677498	0.677459	0.677406	0.67735												408
													380	59.0884	0.38	155.496	0.597319	1.51023	0.0035359	0.00352265	0.00351824	0.00353148	0.0035536	0.00359361	0.00365185	0.00372879	0.00381123		0.595207	0.595215	0.595218	0.59521	0.595197	0.595173	0.595138	0.595092	0.595043		1.27274	1.27276	1.27277	1.27275	1.27272	1.27267	1.2726	1.2725	1.27239		409
													380.5	59.8333	0.3805	157.249	0.604055	1.51016	0.00353329	0.00352005	0.00351565	0.00352888	0.00355099	0.00359099	0.0036492	0.00372611	0.00380853		0.601921	0.601929	0.601931	0.601923	0.60191	0.601886	0.601851	0.601804	0.601754												410
													381	64.7467	0.381	169.939	0.652801	1.51009	0.00353068	0.00351745	0.00351304	0.00352627	0.00354837	0.00358836	0.00364655	0.00372344	0.00380582		0.650496	0.650504	0.650507	0.650499	0.650484	0.650458	0.65042	0.65037	0.650316		1.25242	1.25243	1.25244	1.25242	1.25239	1.25234	1.25227	1.25217	1.25207		411
													381.5	66.0267	0.3815	173.071	0.664833	1.51003	0.00352807	0.00351484	0.00351044	0.00352366	0.00354575	0.00358572	0.00364389	0.00372075	0.00380311		0.662488	0.662496	0.662499	0.66249	0.662476	0.662449	0.662411	0.662359	0.662305												412
													382	69.9333	0.382	183.072	0.703248	1.50996	0.00352545	0.00351223	0.00350783	0.00352104	0.00354313	0.00358308	0.00364123	0.00371806	0.00380039		0.700769	0.700778	0.700781	0.700772	0.700756	0.700728	0.700687	0.700633	0.700576		1.36326	1.36327	1.36328	1.36326	1.36323	1.36318	1.3631	1.36299	1.36288		413
													382.5	73	0.3825	190.85	0.733127	1.50989	0.00352283	0.00350961	0.00350521	0.00351842	0.0035405	0.00358044	0.00363857	0.00371537	0.00379767		0.730544	0.730554	0.730557	0.730548	0.730531	0.730502	0.73046	0.730403	0.730343												414
													383	78.58	0.383	205.17	0.788136	1.50983	0.0035202	0.00350699	0.00350259	0.0035158	0.00353787	0.00357779	0.0036359	0.00371267	0.00379494		0.785361	0.785372	0.785375	0.785365	0.785347	0.785316	0.78527	0.78521	0.785145		1.51591	1.51593	1.51593	1.51591	1.51588	1.51582	1.51573	1.51561	1.51549		415
													383.5	78.1133	0.3835	203.685	0.782434	1.50976	0.00351758	0.00350437	0.00349997	0.00351317	0.00353523	0.00357514	0.00363323	0.00370998	0.00379221		0.779682	0.779692	0.779695	0.779685	0.779668	0.779637	0.779591	0.779531	0.779467												416
													384	80.3267	0.384	209.184	0.803557	1.50969	0.00351494	0.00350174	0.00349734	0.00351054	0.00353259	0.00357249	0.00363055	0.00370727	0.00378948		0.800732	0.800743	0.800746	0.800736	0.800718	0.800686	0.800639	0.800578	0.800511		1.58041	1.58043	1.58044	1.58042	1.58039	1.58032	1.58023	1.58011	1.57998		417
													384.5	78.8	0.3845	204.942	0.787259	1.50962	0.00351231	0.00349911	0.00349471	0.00350791	0.00352995	0.00356983	0.00362788	0.00370457	0.00378675		0.784494	0.784505	0.784508	0.784498	0.78448	0.784449	0.784403	0.784343	0.784278												418
													385	76.6267	0.385	199.03	0.764552	1.50956	0.00350967	0.00349648	0.00349208	0.00350527	0.00352731	0.00356717	0.0036252	0.00370186	0.00378401		0.761869	0.761879	0.761882	0.761872	0.761855	0.761825	0.761781	0.761722	0.761659		1.54636	1.54638	1.54639	1.54637	1.54634	1.54627	1.54618	1.54606	1.54594		419
													385.5	78.02	0.3855	202.386	0.777444	1.50949	0.00350703	0.00349384	0.00348945	0.00350263	0.00352466	0.00356451	0.00362252	0.00369915	0.00378127		0.774718	0.774728	0.774731	0.774721	0.774704	0.774673	0.774628	0.774568	0.774505												420
													386	76.5133	0.386	198.221	0.761443	1.50942	0.00350439	0.00349121	0.00348682	0.00349999	0.00352202	0.00356185	0.00361983	0.00369644	0.00377853		0.758775	0.758785	0.758788	0.758778	0.758762	0.758731	0.758687	0.758629	0.758566		1.53349	1.53351	1.53352	1.5335	1.53347	1.5334	1.53332	1.5332	1.53307		421
													386.5	83.83	0.3865	216.895	0.833178	1.50935	0.00350175	0.00348857	0.00348418	0.00349735	0.00351937	0.00355919	0.00361715	0.00369373	0.00377579		0.83026	0.830271	0.830275	0.830264	0.830245	0.830212	0.830164	0.8301	0.830032												422
													387	89.6667	0.387	231.697	0.890037	1.50929	0.00349911	0.00348593	0.00348155	0.00349471	0.00351672	0.00355652	0.00361446	0.00369101	0.00377304		0.886923	0.886934	0.886938	0.886927	0.886907	0.886872	0.88682	0.886752	0.886679		1.71718	1.71721	1.71721	1.71719	1.71715	1.71708	1.71698	1.71685	1.71671		423
													387.5	84.8133	0.3875	218.873	0.840776	1.50922	0.00349646	0.00348329	0.00347891	0.00349207	0.00351407	0.00355386	0.00361177	0.0036883	0.0037703		0.837836	0.837847	0.837851	0.83784	0.837822	0.837788	0.837739	0.837675	0.837606												424
													388	83.8	0.388	215.979	0.82966	1.50915	0.00349382	0.00348065	0.00347627	0.00348943	0.00351142	0.00355119	0.00360909	0.00368558	0.00376755		0.826761	0.826772	0.826776	0.826765	0.826747	0.826714	0.826666	0.826602	0.826534		1.6646	1.66462	1.66463	1.6646	1.66457	1.6645	1.6644	1.66428	1.66414		425
													388.5	96.4534	0.3885	248.271	0.953705	1.50908	0.00349117	0.00347801	0.00347363	0.00348678	0.00350877	0.00354853	0.0036064	0.00368287	0.00376481		0.950376	0.950388	0.950392	0.95038	0.950359	0.950321	0.950266	0.950193	0.950115												426
													389	100.187	0.389	257.549	0.989346	1.50901	0.00348853	0.00347537	0.00347099	0.00348414	0.00350611	0.00354586	0.00360371	0.00368015	0.00376206		0.985895	0.985908	0.985912	0.985899	0.985877	0.985838	0.985781	0.985705	0.985624		1.93627	1.9363	1.9363	1.93628	1.93624	1.93616	1.93605	1.9359	1.93574		427
													389.5	94.24	0.3895	241.951	0.929428	1.50895	0.00348588	0.00347273	0.00346836	0.0034815	0.00350346	0.00354319	0.00360102	0.00367743	0.00375931		0.926188	0.9262	0.926204	0.926192	0.926172	0.926135	0.926081	0.92601	0.925934												428
													390	102.787	0.39	263.556	1.01242	1.50888	0.00348324	0.00347009	0.00346572	0.00347886	0.00350081	0.00354053	0.00359834	0.00367472	0.00375657		1.00889	1.00891	1.00891	1.0089	1.00887	1.00883	1.00878	1.0087	1.00861		1.93508	1.93511	1.93511	1.93509	1.93505	1.93497	1.93486	1.93471	1.93455		429
													390.5	107.453	0.3905	275.169	1.05703	1.50881	0.0034806	0.00346746	0.00346308	0.00347621	0.00349816	0.00353786	0.00359565	0.003672	0.00375382		1.05335	1.05336	1.05337	1.05335	1.05333	1.05329	1.05323	1.05315	1.05306												430
													391	108.4	0.391	277.238	1.06498	1.50874	0.00347795	0.00346482	0.00346045	0.00347357	0.00349551	0.0035352	0.00359296	0.00366929	0.00375108		1.06127	1.06129	1.06129	1.06128	1.06125	1.06121	1.06115	1.06107	1.06098		2.11462	2.11465	2.11466	2.11463	2.11459	2.1145	2.11438	2.11422	2.11404		431
													391.5	111.333	0.3915	284.376	1.0924	1.50868	0.00347531	0.00346218	0.00345781	0.00347093	0.00349286	0.00353254	0.00359028	0.00366658	0.00374834		1.0886	1.08862	1.08862	1.08861	1.08858	1.08854	1.08848	1.08839	1.0883												432
													392	108.907	0.392	277.823	1.06723	1.50861	0.00347267	0.00345955	0.00345518	0.00346829	0.00349022	0.00352987	0.0035876	0.00366387	0.0037456		1.06352	1.06353	1.06354	1.06352	1.0635	1.06346	1.0634	1.06332	1.06323		2.15212	2.15215	2.15216	2.15213	2.15208	2.152	2.15187	2.15171	2.15153		433
													392.5	116.893	0.3925	297.817	1.14403	1.50854	0.00347003	0.00345691	0.00345254	0.00346566	0.00348757	0.00352721	0.00358491	0.00366116	0.00374286		1.14006	1.14008	1.14008	1.14007	1.14004	1.14	1.13993	1.13984	1.13975												434
													393	126.533	0.393	321.968	1.2368	1.50847	0.0034674	0.00345428	0.00344991	0.00346302	0.00348493	0.00352456	0.00358223	0.00365845	0.00374012		1.23251	1.23253	1.23254	1.23252	1.23249	1.23244	1.23237	1.23228	1.23218		2.37258	2.37261	2.37262	2.37259	2.37253	2.37244	2.3723	2.37212	2.37193		435
													393.5	126.88	0.3935	322.44	1.23861	1.5084	0.00346476	0.00345165	0.00344729	0.00346039	0.00348229	0.0035219	0.00357956	0.00365574	0.00373738		1.23432	1.23434	1.23434	1.23433	1.2343	1.23425	1.23418	1.23409	1.23399												436
													394	126.933	0.394	322.166	1.23756	1.50834	0.00346213	0.00344902	0.00344466	0.00345776	0.00347965	0.00351925	0.00357688	0.00365304	0.00373465		1.23328	1.23329	1.2333	1.23328	1.23326	1.23321	1.23314	1.23304	1.23294		2.4676	2.46763	2.46765	2.46761	2.46756	2.46746	2.46732	2.46713	2.46693		437
													394.5	129.347	0.3945	327.875	1.25949	1.50827	0.0034595	0.0034464	0.00344204	0.00345513	0.00347701	0.00351659	0.00357421	0.00365034	0.00373192		1.25514	1.25515	1.25516	1.25514	1.25511	1.25507	1.25499	1.2549	1.25479												438
													395	142.987	0.395	361.992	1.39055	1.5082	0.00345687	0.00344377	0.00343942	0.0034525	0.00347438	0.00351394	0.00357154	0.00364764	0.00372919		1.38574	1.38576	1.38577	1.38575	1.38572	1.38566	1.38558	1.38548	1.38536		2.64088	2.64091	2.64093	2.64089	2.64083	2.64073	2.64058	2.64037	2.64016		439
													395.5	150.381	0.3955	380.23	1.46061	1.50813	0.00345425	0.00344115	0.0034368	0.00344988	0.00347175	0.0035113	0.00356887	0.00364494	0.00372646		1.45556	1.45558	1.45559	1.45557	1.45554	1.45548	1.4554	1.45529	1.45517												440
													396	149.053	0.396	376.397	1.44589	1.50807	0.00345162	0.00343854	0.00343418	0.00344726	0.00346912	0.00350865	0.0035662	0.00364225	0.00372374		1.4409	1.44092	1.44092	1.4409	1.44087	1.44081	1.44073	1.44062	1.4405		2.89646	2.8965	2.89651	2.89647	2.89641	2.8963	2.89613	2.89591	2.89567		441
													396.5	159.967	0.3965	403.447	1.54979	1.508	0.00344901	0.00343592	0.00343157	0.00344464	0.00346649	0.00350601	0.00356354	0.00363956	0.00372102		1.54445	1.54447	1.54448	1.54446	1.54442	1.54436	1.54427	1.54415	1.54403												442
													397	167.667	0.397	422.334	1.62235	1.50793	0.00344639	0.00343331	0.00342896	0.00344203	0.00346387	0.00350338	0.00356088	0.00363687	0.00371831		1.61676	1.61678	1.61679	1.61676	1.61673	1.61666	1.61657	1.61645	1.61632		3.16121	3.16125	3.16126	3.16122	3.16115	3.16103	3.16084	3.1606	3.16034		443
													397.5	174.24	0.3975	438.34	1.68383	1.50786	0.00344378	0.00343071	0.00342635	0.00343942	0.00346125	0.00350074	0.00355823	0.00363419	0.00371559		1.67803	1.67805	1.67806	1.67804	1.678	1.67794	1.67784	1.67771	1.67757												444
													398	184.413	0.398	463.35	1.77991	1.5078	0.00344117	0.0034281	0.00342375	0.00343681	0.00345864	0.00349811	0.00355558	0.00363151	0.00371288		1.77378	1.7738	1.77381	1.77379	1.77375	1.77368	1.77358	1.77344	1.7733		3.45181	3.45186	3.45187	3.45183	3.45175	3.45162	3.45142	3.45115	3.45087		445
													398.5	186.98	0.3985	469.21	1.80241	1.50773	0.00343856	0.0034255	0.00342115	0.00343421	0.00345602	0.00349549	0.00355293	0.00362883	0.00371018		1.79622	1.79624	1.79625	1.79622	1.79619	1.79611	1.79601	1.79587	1.79573												446
													399	192.767	0.399	483.125	1.85587	1.50766	0.00343596	0.00342291	0.00341856	0.00343161	0.00345342	0.00349286	0.00355029	0.00362616	0.00370748		1.84949	1.84951	1.84952	1.8495	1.84946	1.84938	1.84928	1.84914	1.84899		3.64571	3.64575	3.64577	3.64572	3.64564	3.6455	3.64529	3.64501	3.64471		447
													399.5	203.66	0.3995	509.787	1.95829	1.5076	0.00343337	0.00342031	0.00341597	0.00342901	0.00345081	0.00349025	0.00354765	0.0036235	0.00370478		1.95157	1.95159	1.9516	1.95157	1.95153	1.95145	1.95134	1.95119	1.95103												448
													400	205.293	0.4	513.233	1.97153	1.50753	0.00343077	0.00341773	0.00341338	0.00342642	0.00344821	0.00348763	0.00354501	0.00362083	0.00370209		1.96476	1.96479	1.9648	1.96477	1.96473	1.96465	1.96454	1.96439	1.96423		3.91633	3.91638	3.9164	3.91635	3.91626	3.9161	3.91588	3.91558	3.91526		449
													400.5	221.313	0.4005	552.593	2.12272	1.50746	0.00342818	0.00341514	0.0034108	0.00342383	0.00344562	0.00348502	0.00354238	0.00361817	0.0036994		2.11544	2.11547	2.11548	2.11545	2.11541	2.11532	2.1152	2.11504	2.11487												450
													401	240.133	0.401	598.836	2.30036	1.5074	0.0034256	0.00341256	0.00340822	0.00342125	0.00344303	0.00348242	0.00353975	0.00361552	0.00369672		2.29248	2.29251	2.29252	2.29249	2.29244	2.29235	2.29222	2.29204	2.29186		4.40792	4.40798	4.408	4.40794	4.40785	4.40767	4.40742	4.40708	4.40672		451
													401.5	242.4	0.4015	603.736	2.31918	1.50733	0.00342302	0.00340999	0.00340565	0.00341867	0.00344044	0.00347982	0.00353713	0.00361287	0.00369404		2.31124	2.31127	2.31128	2.31125	2.3112	2.31111	2.31098	2.3108	2.31062												452
													402	249.7	0.402	621.144	2.38605	1.50726	0.00342045	0.00340742	0.00340308	0.0034161	0.00343786	0.00347722	0.00353451	0.00361022	0.00369136		2.37789	2.37792	2.37793	2.3779	2.37785	2.37776	2.37762	2.37744	2.37725		4.68914	4.6892	4.68922	4.68916	4.68905	4.68887	4.6886	4.68824	4.68786		453
													402.5	261.413	0.4025	649.474	2.49488	1.5072	0.00341787	0.00340485	0.00340052	0.00341353	0.00343528	0.00347463	0.0035319	0.00360758	0.00368869		2.48635	2.48639	2.4864	2.48636	2.48631	2.48621	2.48607	2.48588	2.48568												454
													403	276.933	0.403	687.179	2.63972	1.50713	0.00341531	0.00340229	0.00339796	0.00341097	0.00343271	0.00347204	0.00352929	0.00360495	0.00368603		2.63071	2.63074	2.63075	2.63072	2.63066	2.63056	2.6304	2.6302	2.62999		5.11706	5.11712	5.11715	5.11708	5.11697	5.11677	5.11647	5.11608	5.11567		455
													403.5	289.007	0.4035	716.249	2.75139	1.50706	0.00341275	0.00339974	0.0033954	0.00340841	0.00343014	0.00346946	0.00352669	0.00360232	0.00368337		2.742	2.74204	2.74205	2.74201	2.74195	2.74184	2.74169	2.74148	2.74126												456
													404	314.287	0.404	777.937	2.98836	1.507	0.00341019	0.00339719	0.00339286	0.00340585	0.00342758	0.00346688	0.00352409	0.00359969	0.00368072		2.97817	2.9782	2.97822	2.97818	2.97811	2.978	2.97783	2.9776	2.97736		5.72017	5.72024	5.72027	5.72019	5.72007	5.71984	5.71951	5.71908	5.71861		457
													404.5	339.367	0.4045	838.978	3.22284	1.50693	0.00340764	0.00339464	0.00339031	0.00340331	0.00342503	0.00346431	0.0035215	0.00359708	0.00367807		3.21186	3.2119	3.21191	3.21187	3.2118	3.21167	3.21149	3.21125	3.21098												458
													405	358.233	0.405	884.527	3.39781	1.50686	0.0034051	0.0033921	0.00338777	0.00340076	0.00342247	0.00346175	0.00351892	0.00359446	0.00367543		3.38624	3.38628	3.3863	3.38625	3.38618	3.38605	3.38585	3.38559	3.38532		6.59809	6.59818	6.59821	6.59812	6.59798	6.59772	6.59734	6.59684	6.5963		459
													405.5	363.853	0.4055	897.295	3.44686	1.5068	0.00340256	0.00338957	0.00338524	0.00339823	0.00341993	0.00345919	0.00351634	0.00359185	0.00367279		3.43513	3.43517	3.43519	3.43514	3.43507	3.43493	3.43474	3.43448	3.4342												460
													406	378.54	0.406	932.364	3.58157	1.50673	0.00340003	0.00338704	0.00338271	0.00339569	0.00341739	0.00345663	0.00351376	0.00358925	0.00367016		3.56939	3.56944	3.56946	3.56941	3.56933	3.56919	3.56899	3.56872	3.56843		7.00452	7.00461	7.00464	7.00455	7.0044	7.00412	7.00372	7.00319	7.00262		461
													406.5	402.02	0.4065	988.979	3.79905	1.50667	0.0033975	0.00338451	0.00338019	0.00339317	0.00341486	0.00345409	0.00351119	0.00358665	0.00366753		3.78614	3.78619	3.78621	3.78616	3.78608	3.78593	3.78571	3.78542	3.78512												462
													407	425.66	0.407	1045.85	4.0175	1.5066	0.00339498	0.003382	0.00337768	0.00339065	0.00341233	0.00345154	0.00350863	0.00358406	0.00366491		4.00386	4.00392	4.00393	4.00388	4.00379	4.00364	4.00341	4.0031	4.00278		7.79001	7.79011	7.79014	7.79004	7.78987	7.78956	7.78912	7.78853	7.7879		463
													407.5	453.047	0.4075	1111.77	4.27074	1.50654	0.00339246	0.00337949	0.00337517	0.00338813	0.0034098	0.00344901	0.00350607	0.00358148	0.0036623		4.25625	4.25631	4.25633	4.25627	4.25618	4.25601	4.25577	4.25544	4.2551												464
													408	489.027	0.408	1198.59	4.60426	1.50647	0.00338995	0.00337698	0.00337266	0.00338562	0.00340729	0.00344647	0.00350352	0.0035789	0.00365969		4.58866	4.58872	4.58874	4.58868	4.58858	4.5884	4.58813	4.58779	4.58741		8.84491	8.84502	8.84506	8.84495	8.84475	8.84441	8.8439	8.84323	8.84251		465
													408.5	520.78	0.4085	1274.86	4.89723	1.50641	0.00338745	0.00337448	0.00337016	0.00338312	0.00340478	0.00344395	0.00350097	0.00357633	0.00365709		4.88064	4.8807	4.88072	4.88066	4.88055	4.88036	4.88008	4.87971	4.87932												466
													409	544.147	0.409	1330.43	5.1107	1.50634	0.00338495	0.00337199	0.00336767	0.00338062	0.00340227	0.00344143	0.00349843	0.00357376	0.00365449		5.0934	5.09347	5.09349	5.09342	5.09331	5.09311	5.09282	5.09244	5.09202		9.97404	9.97417	9.97421	9.97408	9.97386	9.97347	9.9729	9.97215	9.97134		467
													409.5	583.827	0.4095	1425.71	5.47669	1.50628	0.00338246	0.0033695	0.00336519	0.00337813	0.00339977	0.00343892	0.0034959	0.0035712	0.0036519		5.45816	5.45823	5.45826	5.45819	5.45807	5.45785	5.45754	5.45713	5.45669												468
													410	622.487	0.41	1518.26	5.83222	1.50621	0.00337997	0.00336702	0.00336271	0.00337565	0.00339728	0.00343641	0.00349337	0.00356865	0.00364932		5.81251	5.81258	5.81261	5.81253	5.81241	5.81218	5.81185	5.81141	5.81094		11.2707	11.2708	11.2709	11.2707	11.2705	11.27	11.2694	11.2685	11.2676		469
													410.5	668.113	0.4105	1627.56	6.25208	1.50615	0.00337749	0.00336454	0.00336023	0.00337317	0.00339479	0.00343391	0.00349085	0.0035661	0.00364675		6.23097	6.23105	6.23108	6.23099	6.23086	6.23061	6.23026	6.22979	6.22928												470
													411	723.46	0.411	1760.24	6.76177	1.50608	0.00337502	0.00336207	0.00335777	0.0033707	0.00339231	0.00343142	0.00348834	0.00356356	0.00364418		6.73895	6.73904	6.73907	6.73898	6.73883	6.73857	6.73818	6.73768	6.73713		12.9699	12.9701	12.9701	12.97	12.9697	12.9692	12.9684	12.9675	12.9664		471
													411.5	775.789	0.4115	1885.27	7.24205	1.50602	0.00337255	0.00335961	0.00335531	0.00336823	0.00338984	0.00342893	0.00348583	0.00356102	0.00364161		7.21763	7.21772	7.21775	7.21766	7.2175	7.21722	7.21681	7.21626	7.21568												472
													412	837.533	0.412	2032.85	7.80895	1.50596	0.00337009	0.00335716	0.00335285	0.00336577	0.00338737	0.00342645	0.00348333	0.00355849	0.00363906		7.78263	7.78274	7.78277	7.78267	7.7825	7.78219	7.78175	7.78116	7.78053		15.0003	15.0005	15.0005	15.0003	15	14.9994	14.9986	14.9974	14.9962		473
													412.5	906.6	0.4125	2197.82	8.44267	1.50589	0.00336763	0.00335471	0.0033504	0.00336332	0.00338491	0.00342397	0.00348083	0.00355597	0.00363651		8.41423	8.41434	8.41438	8.41427	8.41409	8.41376	8.41328	8.41264	8.41196												474
													413	966.933	0.413	2341.24	8.99362	1.50583	0.00336519	0.00335226	0.00334796	0.00336088	0.00338246	0.00342151	0.00347835	0.00355346	0.00363397		8.96335	8.96347	8.96351	8.96339	8.96319	8.96284	8.96233	8.96166	8.96093		17.3776	17.3778	17.3779	17.3777	17.3773	17.3766	17.3756	17.3743	17.3729		475
													413.5	1048.47	0.4135	2535.59	9.74018	1.50576	0.00336275	0.00334983	0.00334553	0.00335844	0.00338001	0.00341905	0.00347586	0.00355095	0.00363143		9.70743	9.70755	9.70759	9.70747	9.70726	9.70688	9.70632	9.70559	9.70481												476
													414	1136.13	0.414	2744.28	10.5418	1.5057	0.00336031	0.0033474	0.0033431	0.003356	0.00337757	0.00341659	0.00347339	0.00354845	0.0036289		10.5064	10.5066	10.5066	10.5065	10.5062	10.5058	10.5052	10.5044	10.5036		20.2139	20.2141	20.2142	20.2139	20.2135	20.2127	20.2116	20.21	20.2084		477
													414.5	1240.4	0.4145	2992.52	11.4954	1.50564	0.00335789	0.00334498	0.00334068	0.00335358	0.00337514	0.00341414	0.00347092	0.00354596	0.00362638		11.4568	11.457	11.457	11.4569	11.4566	11.4562	11.4555	11.4547	11.4537												478
													415	1326.47	0.415	3196.31	12.2782	1.50557	0.00335546	0.00334256	0.00333827	0.00335116	0.00337271	0.0034117	0.00346846	0.00354347	0.00362386		12.237	12.2372	12.2373	12.2371	12.2368	12.2363	12.2357	12.2347	12.2337		23.6939	23.6942	23.6943	23.694	23.6935	23.6925	23.6912	23.6894	23.6875		479
													415.5	1432.67	0.4155	3448.05	13.2453	1.50551	0.00335305	0.00334015	0.00333586	0.00334875	0.00337029	0.00340927	0.00346601	0.00354099	0.00362136		13.2009	13.2011	13.2011	13.2009	13.2007	13.2001	13.1994	13.1984	13.1973												480
													416	1570.47	0.416	3775.16	14.5018	1.50545	0.00335064	0.00333775	0.00333346	0.00334634	0.00336788	0.00340684	0.00346356	0.00353852	0.00361886		14.4533	14.4534	14.4535	14.4533	14.453	14.4524	14.4516	14.4505	14.4494		27.6541	27.6545	27.6546	27.6543	27.6537	27.6526	27.651	27.6489	27.6467		481
													416.5	1703.33	0.4165	4089.64	15.7099	1.50539	0.00334825	0.00333535	0.00333106	0.00334395	0.00336548	0.00340442	0.00346112	0.00353605	0.00361636		15.6573	15.6575	15.6575	15.6573	15.657	15.6564	15.6555	15.6543	15.6531												482
													417	1847.67	0.417	4430.86	17.0206	1.50532	0.00334585	0.00333297	0.00332868	0.00334155	0.00336308	0.00340201	0.00345869	0.00353359	0.00361388		16.9637	16.9639	16.964	16.9637	16.9634	16.9627	16.9618	16.9605	16.9591		32.6209	32.6214	32.6215	32.6211	32.6204	32.6191	32.6172	32.6148	32.6122		483
													417.5	2005.47	0.4175	4803.51	18.4521	1.50526	0.00334347	0.00333059	0.0033263	0.00333917	0.00336069	0.00339961	0.00345626	0.00353114	0.0036114		18.3904	18.3907	18.3908	18.3905	18.3901	18.3894	18.3884	18.387	18.3855												484
													418	2195.13	0.418	5251.52	20.1731	1.5052	0.00334109	0.00332821	0.00332392	0.00333679	0.0033583	0.00339721	0.00345385	0.0035287	0.00360893		20.1057	20.106	20.106	20.1058	20.1053	20.1046	20.1034	20.1019	20.1003		38.4961	38.4966	38.4968	38.4963	38.4955	38.494	38.4918	38.4889	38.4858		485
													418.5	2395	0.4185	5722.82	21.9836	1.50514	0.00333872	0.00332584	0.00332156	0.00333442	0.00335592	0.00339482	0.00345144	0.00352626	0.00360646		21.9102	21.9104	21.9105	21.9103	21.9098	21.9089	21.9077	21.906	21.9043												486
													419	2605.73	0.419	6218.93	23.8893	1.50508	0.00333635	0.00332348	0.0033192	0.00333206	0.00335355	0.00339243	0.00344903	0.00352383	0.00360401		23.8096	23.8099	23.81	23.8097	23.8092	23.8083	23.8069	23.8051	23.8032		45.7198	45.7204	45.7206	45.72	45.719	45.7172	45.7146	45.7112	45.7075		487
													419.5	2821.07	0.4195	6724.83	25.8327	1.50501	0.00333399	0.00332113	0.00331685	0.0033297	0.00335119	0.00339006	0.00344664	0.00352141	0.00360156		25.7465	25.7469	25.747	25.7466	25.7461	25.7451	25.7436	25.7417	25.7396												488
													420	3065.13	0.42	7297.94	28.0342	1.50495	0.00333165	0.00331879	0.00331451	0.00332736	0.00334883	0.00338769	0.00344425	0.003519	0.00359912		27.9408	27.9411	27.9413	27.9409	27.9403	27.9392	27.9376	27.9355	27.9333		53.6873	53.688	53.6882	53.6876	53.6864	53.6843	53.6813	53.6772	53.6729		489
													420.5	3342.47	0.4205	7948.79	30.5344	1.50489	0.0033293	0.00331645	0.00331217	0.00332501	0.00334648	0.00338532	0.00344186	0.00351659	0.00359668		30.4327	30.4331	30.4332	30.4328	30.4322	30.431	30.4293	30.427	30.4245												490
													421	3616.73	0.421	8590.82	33.0006	1.50483	0.00332697	0.00331412	0.00330984	0.00332268	0.00334414	0.00338297	0.00343949	0.00351419	0.00359425		32.8908	32.8913	32.8914	32.891	32.8903	32.889	32.8871	32.8847	32.882		63.3235	63.3244	63.3246	63.3238	63.3225	63.32	63.3164	63.3116	63.3066		491
													421.5	3910.87	0.4215	9278.45	35.6421	1.50477	0.00332464	0.00331179	0.00330752	0.00332035	0.00334181	0.00338062	0.00343712	0.0035118	0.00359183		35.5236	35.5241	35.5242	35.5238	35.523	35.5216	35.5196	35.5169	35.5141												492
													422	4246.67	0.422	10063.2	38.6566	1.50471	0.00332232	0.00330948	0.0033052	0.00331803	0.00333948	0.00337828	0.00343476	0.00350941	0.00358942		38.5282	38.5287	38.5288	38.5283	38.5275	38.526	38.5238	38.5209	38.5178		74.0518	74.0527	74.053	74.0521	74.0505	74.0476	74.0434	74.0379	74.0319		493
													422.5	4578.73	0.4225	10837.2	41.63	1.50465	0.00332	0.00330717	0.00330289	0.00331572	0.00333716	0.00337595	0.00343241	0.00350703	0.00358702		41.4918	41.4923	41.4925	41.492	41.4911	41.4895	41.4871	41.484	41.4807												494
													423	4931.93	0.423	11659.4	44.7883	1.50459	0.0033177	0.00330487	0.00330059	0.00331342	0.00333485	0.00337362	0.00343007	0.00350466	0.00358462		44.6397	44.6403	44.6405	44.6399	44.6389	44.6372	44.6347	44.6313	44.6278		86.1315	86.1326	86.133	86.1319	86.13	86.1267	86.1218	86.1153	86.1084		495
													423.5	5317.33	0.4235	12555.7	48.2312	1.50453	0.0033154	0.00330257	0.0032983	0.00331112	0.00333255	0.0033713	0.00342773	0.0035023	0.00358223		48.0713	48.0719	48.0721	48.0715	48.0705	48.0686	48.0659	48.0623	48.0585												496
													424	5739.8	0.424	13537.3	52.0018	1.50447	0.00331311	0.00330028	0.00329602	0.00330883	0.00333025	0.00336899	0.0034254	0.00349995	0.00357985		51.8296	51.8302	51.8304	51.8298	51.8287	51.8266	51.8237	51.8198	51.8157		99.9009	99.9022	99.9026	99.9013	99.8992	99.8953	99.8896	99.8821	99.8741		497
													424.5	6206.2	0.4245	14620	56.1611	1.50441	0.00331082	0.003298	0.00329374	0.00330655	0.00332796	0.00336669	0.00342308	0.0034976	0.00357748		55.9752	55.9759	55.9762	55.9754	55.9742	55.9721	55.9689	55.9647	55.9602												498
													425	6676.4	0.425	15709.2	60.345	1.50435	0.00330855	0.00329573	0.00329147	0.00330427	0.00332568	0.0033644	0.00342076	0.00349526	0.00357511		60.1453	60.1461	60.1464	60.1456	60.1443	60.142	60.1386	60.1341	60.1293		116.121	116.122	116.123	116.121	116.119	116.114	116.107	116.099	116.089		499
													425.5	7178.53	0.4255	16870.8	64.8073	1.50429	0.00330628	0.00329347	0.0032892	0.003302	0.0033234	0.00336211	0.00341846	0.00349293	0.00357275		64.593	64.5939	64.5941	64.5933	64.5919	64.5894	64.5858	64.5809	64.5758												500
													426	7726.2	0.426	18136.6	69.6697	1.50423	0.00330402	0.00329121	0.00328695	0.00329974	0.00332113	0.00335983	0.00341616	0.0034906	0.0035704		69.4395	69.4404	69.4407	69.4398	69.4384	69.4357	69.4317	69.4265	69.421		134.033	134.034	134.035	134.033	134.03	134.025	134.018	134.007	133.997		501
													426.5	8286.22	0.4265	19428.4	74.632	1.50417	0.00330176	0.00328896	0.0032847	0.00329749	0.00331887	0.00335755	0.00341386	0.00348829	0.00356806		74.3856	74.3865	74.3868	74.3859	74.3843	74.3814	74.3772	74.3717	74.3657												502
													427	8882.67	0.427	20802.5	79.9105	1.50411	0.00329952	0.00328672	0.00328246	0.00329525	0.00331662	0.00335529	0.00341158	0.00348598	0.00356573		79.6468	79.6478	79.6482	79.6471	79.6454	79.6423	79.6378	79.6319	79.6255		154.032	154.034	154.035	154.033	154.03	154.024	154.015	154.004	153.991		503
													427.5	9504.71	0.4275	22233.2	85.4064	1.50405	0.00329728	0.00328448	0.00328023	0.00329301	0.00331438	0.00335303	0.0034093	0.00348368	0.0035634		85.1248	85.1259	85.1263	85.1252	85.1233	85.12	85.1152	85.1089	85.1021												504
													428	10175	0.428	23773.3	91.3222	1.50399	0.00329504	0.00328226	0.003278	0.00329078	0.00331214	0.00335078	0.00340703	0.00348138	0.00356108		91.0213	91.0225	91.0229	91.0217	91.0198	91.0162	91.0111	91.0043	90.997		176.146	176.148	176.149	176.147	176.143	176.136	176.126	176.113	176.099		505
													428.5	10890.7	0.4285	25415.8	97.6319	1.50393	0.00329282	0.00328004	0.00327578	0.00328856	0.00330991	0.00334854	0.00340477	0.0034791	0.00355877		97.3104	97.3117	97.3121	97.3108	97.3087	97.305	97.2995	97.2922	97.2844												506
													429	11623.3	0.429	27094	104.079	1.50388	0.0032906	0.00327782	0.00327357	0.00328634	0.00330769	0.0033463	0.00340252	0.00347682	0.00355646		103.736	103.737	103.738	103.737	103.734	103.73	103.724	103.717	103.708		201.047	201.049	201.05	201.047	201.043	201.035	201.024	201.009	200.993		507
													429.5	12373.1	0.4295	28808.1	110.663	1.50382	0.00328839	0.00327562	0.00327137	0.00328413	0.00330547	0.00334407	0.00340027	0.00347455	0.00355417		110.299	110.3	110.301	110.299	110.297	110.293	110.287	110.278	110.27												508
													430	13175.5	0.43	30640.7	117.703	1.50376	0.00328619	0.00327342	0.00326917	0.00328193	0.00330326	0.00334185	0.00339803	0.00347229	0.00355188		117.316	117.317	117.318	117.316	117.314	117.309	117.303	117.294	117.285		227.615	227.618	227.619	227.616	227.611	227.602	227.589	227.572	227.554		509
													430.5	13993.2	0.4305	32504.6	124.863	1.5037	0.003284	0.00327123	0.00326698	0.00327974	0.00330106	0.00333964	0.0033958	0.00347003	0.0035496		124.453	124.454	124.455	124.453	124.451	124.446	124.439	124.429	124.419												510
													431	14824.5	0.431	34395.7	132.127	1.50364	0.00328181	0.00326905	0.0032648	0.00327755	0.00329887	0.00333744	0.00339358	0.00346778	0.00354733		131.693	131.695	131.696	131.694	131.691	131.686	131.679	131.669	131.658		256.146	256.149	256.15	256.147	256.142	256.132	256.117	256.098	256.078		511
													431.5	15690.3	0.4315	36362.3	139.682	1.50359	0.00327963	0.00326687	0.00326263	0.00327538	0.00329669	0.00333524	0.00339137	0.00346555	0.00354506		139.223	139.225	139.226	139.224	139.221	139.216	139.208	139.197	139.186												512
													432	16642.3	0.432	38523.9	147.985	1.50353	0.00327746	0.00326471	0.00326046	0.00327321	0.00329451	0.00333305	0.00338916	0.00346331	0.00354281		147.5	147.502	147.503	147.501	147.498	147.492	147.484	147.473	147.461		286.724	286.727	286.729	286.725	286.719	286.708	286.692	286.67	286.647		513
													432.5	17683.5	0.4325	40886.6	157.061	1.50347	0.0032753	0.00326255	0.0032583	0.00327104	0.00329234	0.00333087	0.00338696	0.00346109	0.00354056		156.547	156.549	156.55	156.548	156.544	156.538	156.529	156.518	156.505												514
													433	18721.8	0.433	43237.4	166.091	1.50342	0.00327314	0.0032604	0.00325615	0.00326889	0.00329018	0.00332869	0.00338476	0.00345887	0.00353831		165.548	165.55	165.55	165.548	165.545	165.538	165.529	165.517	165.504		322.095	322.099	322.1	322.096	322.089	322.077	322.059	322.035	322.009		515
													433.5	19824.5	0.4335	45731.1	175.671	1.50336	0.00327099	0.00325825	0.00325401	0.00326674	0.00328802	0.00332653	0.00338258	0.00345666	0.00353608		175.096	175.099	175.099	175.097	175.093	175.087	175.077	175.064	175.05												516
													434	21058.8	0.434	48522.6	186.394	1.5033	0.00326885	0.00325611	0.00325187	0.0032646	0.00328588	0.00332437	0.0033804	0.00345446	0.00353386		185.785	185.787	185.788	185.786	185.782	185.775	185.764	185.75	185.735		360.881	360.886	360.887	360.883	360.875	360.861	360.841	360.814	360.785		517
													434.5	22394.4	0.4345	51540.7	197.988	1.50325	0.00326672	0.00325398	0.00324975	0.00326247	0.00328374	0.00332222	0.00337823	0.00345227	0.00353164		197.341	197.343	197.344	197.342	197.337	197.33	197.319	197.304	197.288												518
													435	23855.7	0.435	54840.8	210.665	1.50319	0.00326459	0.00325186	0.00324762	0.00326035	0.00328161	0.00332007	0.00337607	0.00345009	0.00352943		209.977	209.98	209.98	209.978	209.973	209.965	209.953	209.938	209.921		407.318	407.323	407.325	407.319	407.311	407.295	407.272	407.242	407.209		519
													435.5	25411.9	0.4355	58351.1	224.149	1.50313	0.00326247	0.00324975	0.00324551	0.00325823	0.00327948	0.00331794	0.00337392	0.00344791	0.00352722		223.418	223.421	223.422	223.419	223.414	223.405	223.393	223.376	223.358												520
													436	26983.9	0.436	61889.7	237.742	1.50308	0.00326036	0.00324764	0.00324341	0.00325612	0.00327737	0.00331581	0.00337177	0.00344574	0.00352503		236.967	236.97	236.971	236.968	236.963	236.954	236.941	236.923	236.904		460.385	460.391	460.393	460.387	460.377	460.359	460.333	460.299	460.263		521
													436.5	28636.8	0.4365	65605.6	252.016	1.50302	0.00325826	0.00324554	0.00324131	0.00325402	0.00327526	0.00331368	0.00336963	0.00344358	0.00352284		251.195	251.198	251.199	251.196	251.191	251.181	251.167	251.148	251.129												522
													437	30491.9	0.437	69775.4	268.034	1.50297	0.00325616	0.00324345	0.00323922	0.00325192	0.00327316	0.00331157	0.0033675	0.00344142	0.00352066		267.162	267.165	267.166	267.163	267.157	267.147	267.132	267.112	267.091		518.357	518.363	518.366	518.359	518.348	518.328	518.299	518.26	518.219		523
													437.5	32499	0.4375	74283.4	285.351	1.50291	0.00325407	0.00324136	0.00323713	0.00324983	0.00327106	0.00330946	0.00336538	0.00343927	0.00351849		284.423	284.426	284.427	284.424	284.418	284.407	284.391	284.37	284.347												524
													438	34672.8	0.438	79161.6	304.09	1.50286	0.00325199	0.00323929	0.00323506	0.00324775	0.00326898	0.00330737	0.00336326	0.00343714	0.00351633		303.101	303.105	303.106	303.103	303.096	303.084	303.067	303.045	303.021		587.524	587.531	587.534	587.526	587.514	587.491	587.458	587.415	587.368		525
													438.5	36843.7	0.4385	84022.2	322.761	1.5028	0.00324992	0.00323722	0.00323299	0.00324568	0.0032669	0.00330528	0.00336115	0.003435	0.00351417		321.713	321.717	321.718	321.714	321.707	321.695	321.677	321.653	321.627												526
													439	39145.5	0.439	89169.6	342.535	1.50275	0.00324785	0.00323515	0.00323093	0.00324362	0.00326482	0.00330319	0.00335905	0.00343288	0.00351203		341.422	341.427	341.428	341.424	341.416	341.403	341.384	341.359	341.332		663.135	663.143	663.146	663.138	663.123	663.098	663.061	663.012	662.959		527
													439.5	41443.3	0.4395	94296.6	362.229	1.50269	0.00324579	0.0032331	0.00322888	0.00324156	0.00326276	0.00330112	0.00335696	0.00343076	0.00350989		361.054	361.058	361.06	361.055	361.048	361.034	361.013	360.987	360.958												528
													440	43630.5	0.44	99160.2	380.913	1.50264	0.00324374	0.00323105	0.00322683	0.00323951	0.0032607	0.00329905	0.00335487	0.00342866	0.00350775		379.677	379.682	379.683	379.679	379.671	379.656	379.635	379.607	379.576		740.731	740.74	740.743	740.734	740.718	740.69	740.648	740.593	740.534		529
													440.5	45916.9	0.4405	104238	400.419	1.50259	0.0032417	0.00322901	0.00322479	0.00323747	0.00325865	0.00329699	0.00335279	0.00342655	0.00350563		399.121	399.126	399.128	399.123	399.114	399.099	399.077	399.047	399.015												530
													441	48132.2	0.441	109143	419.261	1.50253	0.00323966	0.00322698	0.00322276	0.00323543	0.00325661	0.00329493	0.00335072	0.00342446	0.00350351		417.903	417.908	417.91	417.905	417.896	417.88	417.857	417.826	417.792		817.024	817.035	817.038	817.028	817.01	816.979	816.933	816.873	816.808		531
													441.5	50173.3	0.4415	113643	436.545	1.50248	0.00323763	0.00322496	0.00322074	0.0032334	0.00325458	0.00329289	0.00334866	0.00342238	0.0035014		435.132	435.138	435.139	435.134	435.125	435.108	435.084	435.051	435.017												532
													442	51949.7	0.442	117533	451.491	1.50242	0.00323561	0.00322294	0.00321872	0.00323138	0.00325255	0.00329085	0.0033466	0.0034203	0.0034993		450.03	450.035	450.037	450.032	450.022	450.005	449.98	449.946	449.911		885.162	885.173	885.177	885.165	885.147	885.113	885.063	884.998	884.927		533
													442.5	53479.8	0.4425	120858	464.263	1.50237	0.0032336	0.00322093	0.00321671	0.00322937	0.00325053	0.00328882	0.00334455	0.00341823	0.00349721		462.762	462.768	462.77	462.764	462.754	462.736	462.71	462.676	462.64												534
													443	54641.1	0.443	123343	473.809	1.50232	0.00323159	0.00321892	0.00321471	0.00322737	0.00324852	0.00328679	0.00334251	0.00341616	0.00349512		472.278	472.284	472.286	472.28	472.27	472.252	472.226	472.191	472.153		935.04	935.052	935.056	935.044	935.024	934.988	934.936	934.867	934.793		535
													443.5	55383.8	0.4435	124879	479.708	1.50226	0.00322959	0.00321693	0.00321271	0.00322537	0.00324652	0.00328478	0.00334048	0.00341411	0.00349304		478.159	478.165	478.167	478.161	478.151	478.132	478.106	478.07	478.033												536
													444	55673.8	0.444	125391	481.677	1.50221	0.0032276	0.00321494	0.00321073	0.00322338	0.00324452	0.00328277	0.00333845	0.00341206	0.00349097		480.122	480.128	480.13	480.124	480.114	480.095	480.069	480.033	479.995		958.281	958.293	958.297	958.285	958.265	958.228	958.174	958.104	958.028		537
													444.5	55537	0.4445	124943	479.953	1.50216	0.00322561	0.00321296	0.00320875	0.00322139	0.00324253	0.00328077	0.00333644	0.00341002	0.00348891		478.404	478.41	478.412	478.406	478.396	478.378	478.351	478.316	478.278												538
													445	54940.9	0.445	123463	474.268	1.50211	0.00322364	0.00321099	0.00320678	0.00321942	0.00324055	0.00327877	0.00333442	0.00340799	0.00348685		472.739	472.745	472.747	472.741	472.731	472.713	472.687	472.652	472.614		951.144	951.156	951.16	951.148	951.128	951.091	951.038	950.968	950.892		539
													445.5	53806.8	0.4455	120778	463.956	1.50205	0.00322167	0.00320902	0.00320481	0.00321745	0.00323857	0.00327678	0.00333242	0.00340596	0.0034848		462.462	462.467	462.469	462.464	462.454	462.436	462.41	462.376	462.339												540
													446	52280.3	0.446	117220	450.288	1.502	0.0032197	0.00320706	0.00320285	0.00321549	0.0032366	0.0032748	0.00333043	0.00340394	0.00348276		448.838	448.844	448.846	448.84	448.831	448.814	448.789	448.756	448.72		911.3	911.312	911.315	911.304	911.285	911.25	911.199	911.132	911.06		541
													446.5	50432.5	0.4465	112951	433.888	1.50195	0.00321775	0.00320511	0.0032009	0.00321353	0.00323464	0.00327283	0.00332844	0.00340193	0.00348073		432.491	432.497	432.499	432.493	432.484	432.468	432.443	432.412	432.377												542
													447	48225	0.447	107886	414.432	1.5019	0.0032158	0.00320316	0.00319896	0.00321158	0.00323269	0.00327087	0.00332645	0.00339993	0.0034787		413.099	413.104	413.106	413.101	413.092	413.076	413.053	413.022	412.99		845.59	845.601	845.605	845.594	845.576	845.544	845.496	845.434	845.367		543
													447.5	45752.2	0.4475	102240	392.742	1.50185	0.00321386	0.00320123	0.00319702	0.00320964	0.00323074	0.00326891	0.00332448	0.00339793	0.00347668		391.48	391.485	391.486	391.481	391.473	391.458	391.436	391.407	391.376												544
													448	43149	0.448	96314.7	369.982	1.5018	0.00321192	0.0031993	0.00319509	0.00320771	0.0032288	0.00326696	0.00332251	0.00339595	0.00347467		368.794	368.798	368.8	368.795	368.787	368.773	368.753	368.726	368.696		760.273	760.283	760.286	760.276	760.26	760.231	760.189	760.133	760.073		545
													448.5	40353.7	0.4485	89974.8	345.628	1.50174	0.00321	0.00319737	0.00319317	0.00320579	0.00322687	0.00326502	0.00332055	0.00339397	0.00347267		344.518	344.523	344.524	344.52	344.513	344.499	344.48	344.455	344.428												546
													449	37544.7	0.449	83618.4	321.211	1.50169	0.00320808	0.00319546	0.00319126	0.00320387	0.00322495	0.00326308	0.0033186	0.00339199	0.00347067		320.18	320.184	320.185	320.181	320.175	320.162	320.145	320.121	320.096		664.698	664.707	664.71	664.701	664.687	664.662	664.625	664.576	664.523		547
													449.5	34720.2	0.4495	77241.8	296.715	1.50164	0.00320617	0.00319355	0.00318935	0.00320196	0.00322303	0.00326115	0.00331666	0.00339003	0.00346868		295.764	295.768	295.769	295.765	295.759	295.748	295.731	295.709	295.686												548
													450	32035.3	0.45	71189.7	273.467	1.50159	0.00320426	0.00319165	0.00318745	0.00320005	0.00322112	0.00325923	0.00331472	0.00338807	0.0034667		272.591	272.594	272.595	272.592	272.586	272.576	272.56	272.54	272.519		568.355	568.362	568.364	568.357	568.345	568.323	568.292	568.25	568.205		549
													450.5	29569.5	0.4505	65637	252.137	1.50154	0.00320236	0.00318975	0.00318556	0.00319816	0.00321922	0.00325732	0.00331279	0.00338612	0.00346473		251.33	251.333	251.334	251.331	251.325	251.316	251.302	251.283	251.263												550
													451	27186.1	0.451	60279.6	231.557	1.50149	0.00320047	0.00318787	0.00318367	0.00319627	0.00321732	0.00325541	0.00331087	0.00338417	0.00346276		230.816	230.819	230.82	230.817	230.812	230.804	230.791	230.774	230.755		482.146	482.152	482.154	482.148	482.138	482.119	482.092	482.057	482.019		551
													451.5	25007.8	0.4515	55388.3	212.768	1.50144	0.00319859	0.00318599	0.00318179	0.00319438	0.00321543	0.00325351	0.00330895	0.00338224	0.0034608		212.087	212.09	212.091	212.088	212.083	212.075	212.064	212.048	212.031												552
													452	23008.3	0.452	50903.3	195.539	1.50139	0.00319671	0.00318411	0.00317992	0.00319251	0.00321355	0.00325162	0.00330704	0.00338031	0.00345885		194.914	194.917	194.918	194.915	194.911	194.904	194.893	194.878	194.863		407.001	407.006	407.008	407.003	406.994	406.979	406.956	406.926	406.894		553
													452.5	21192.6	0.4525	46834.4	179.909	1.50134	0.00319484	0.00318225	0.00317806	0.00319064	0.00321168	0.00324973	0.00330514	0.00337838	0.00345691		179.334	179.337	179.337	179.335	179.331	179.324	179.314	179.301	179.287												554
													453	19634.5	0.453	43343.3	166.498	1.50129	0.00319298	0.00318039	0.0031762	0.00318878	0.00320981	0.00324785	0.00330325	0.00337647	0.00345497		165.966	165.969	165.969	165.967	165.964	165.957	165.948	165.936	165.923		345.301	345.305	345.307	345.302	345.295	345.282	345.263	345.237	345.21		555
													453.5	18254.4	0.4535	40252.2	154.624	1.50124	0.00319112	0.00317854	0.00317435	0.00318692	0.00320795	0.00324598	0.00330136	0.00337456	0.00345304		154.131	154.133	154.133	154.131	154.128	154.122	154.114	154.102	154.09												556
													454	17037.8	0.454	37528.3	144.161	1.50119	0.00318927	0.00317669	0.0031725	0.00318508	0.00320609	0.00324412	0.00329948	0.00337266	0.00345112		143.701	143.703	143.703	143.701	143.698	143.693	143.685	143.674	143.663		297.832	297.835	297.837	297.833	297.827	297.815	297.799	297.777	297.753		557
													454.5	15981.2	0.4545	35162.2	135.072	1.50114	0.00318743	0.00317485	0.00317067	0.00318324	0.00320425	0.00324226	0.00329761	0.00337077	0.0034492		134.641	134.643	134.643	134.642	134.639	134.634	134.626	134.616	134.606												558
													455	15119.3	0.455	33229.3	127.647	1.50109	0.0031856	0.00317302	0.00316884	0.0031814	0.00320241	0.00324041	0.00329574	0.00336888	0.00344729		127.24	127.242	127.242	127.241	127.238	127.233	127.226	127.217	127.207		261.881	261.884	261.886	261.882	261.877	261.867	261.852	261.833	261.812		559
													455.5	14336.2	0.4555	31473.6	120.902	1.50105	0.00318377	0.0031712	0.00316701	0.00317957	0.00320057	0.00323856	0.00329388	0.003367	0.00344539		120.517	120.519	120.519	120.518	120.515	120.511	120.504	120.495	120.486												560
													456	13643.1	0.456	29919.1	114.931	1.501	0.00318195	0.00316938	0.0031652	0.00317775	0.00319875	0.00323673	0.00329203	0.00336513	0.0034435		114.565	114.566	114.567	114.565	114.563	114.559	114.552	114.544	114.535		235.082	235.085	235.086	235.083	235.078	235.069	235.056	235.039	235.021		561
													456.5	13072.3	0.4565	28635.9	110.002	1.50095	0.00318013	0.00316757	0.00316339	0.00317594	0.00319693	0.0032349	0.00329018	0.00336326	0.00344161		109.652	109.653	109.654	109.652	109.65	109.646	109.64	109.632	109.623												562
													457	12516.6	0.457	27388.6	105.21	1.5009	0.00317833	0.00316576	0.00316158	0.00317414	0.00319512	0.00323308	0.00328834	0.0033614	0.00343973		104.876	104.877	104.877	104.876	104.874	104.87	104.864	104.856	104.848		214.527	214.53	214.531	214.528	214.524	214.516	214.504	214.488	214.471		563
													457.5	12027.4	0.4575	26289.4	100.988	1.50085	0.00317652	0.00316397	0.00315979	0.00317234	0.00319331	0.00323126	0.00328651	0.00335955	0.00343786		100.667	100.668	100.668	100.667	100.665	100.661	100.656	100.648	100.64												564
													458	11550.9	0.458	25220.4	96.8811	1.5008	0.00317473	0.00316218	0.003158	0.00317054	0.00319151	0.00322945	0.00328469	0.00335771	0.00343599		96.5736	96.5748	96.5752	96.574	96.5719	96.5683	96.5629	96.5558	96.5482		197.24	197.243	197.244	197.241	197.237	197.23	197.219	197.204	197.189		565
													458.5	11122.5	0.4585	24258.3	93.1857	1.50076	0.00317294	0.00316039	0.00315622	0.00316876	0.00318972	0.00322765	0.00328287	0.00335587	0.00343413		92.89	92.8912	92.8915	92.8904	92.8884	92.8849	92.8797	92.8729	92.8656												566
													459	10744.4	0.459	23408.3	89.9203	1.50071	0.00317116	0.00315862	0.00315444	0.00316698	0.00318794	0.00322585	0.00328106	0.00335404	0.00343228		89.6352	89.6363	89.6367	89.6355	89.6336	89.6302	89.6253	89.6187	89.6117		182.525	182.527	182.528	182.526	182.522	182.515	182.505	182.492	182.477		567
													459.5	10293.8	0.4595	22402.3	86.0557	1.50066	0.00316939	0.00315685	0.00315267	0.00316521	0.00318616	0.00322406	0.00327926	0.00335221	0.00343044		85.783	85.7841	85.7844	85.7833	85.7815	85.7783	85.7735	85.7672	85.7605												568
													460	9876.51	0.46	21470.7	82.4771	1.50061	0.00316762	0.00315508	0.00315091	0.00316344	0.00318439	0.00322228	0.00327746	0.0033504	0.0034286		82.2158	82.2169	82.2172	82.2162	82.2145	82.2113	82.2068	82.2008	82.1943		167.999	168.001	168.002	168	167.996	167.99	167.98	167.968	167.955		569
													460.5	9469.65	0.4605	20563.9	78.9937	1.50057	0.00316586	0.00315333	0.00314915	0.00316168	0.00318262	0.00322051	0.00327567	0.00334859	0.00342677		78.7436	78.7446	78.7449	78.7439	78.7423	78.7393	78.7349	78.7292	78.723												570
													461	9021.56	0.461	19569.5	75.1742	1.50052	0.00316411	0.00315158	0.0031474	0.00315993	0.00318086	0.00321874	0.00327389	0.00334678	0.00342494		74.9363	74.9372	74.9375	74.9366	74.935	74.9322	74.928	74.9226	74.9167		153.68	153.682	153.682	153.681	153.677	153.671	153.663	153.652	153.64		571
													461.5	8611.85	0.4615	18660.6	71.6824	1.50047	0.00316236	0.00314983	0.00314566	0.00315818	0.00317911	0.00321698	0.00327211	0.00334499	0.00342313		71.4557	71.4566	71.4569	71.456	71.4545	71.4518	71.4479	71.4427	71.4371												572
													462	8218.59	0.462	17789.1	68.335	1.50043	0.00316062	0.0031481	0.00314393	0.00315644	0.00317737	0.00321522	0.00327034	0.0033432	0.00342132		68.119	68.1198	68.1201	68.1193	68.1178	68.1153	68.1115	68.1065	68.1012		139.575	139.576	139.577	139.575	139.572	139.567	139.559	139.549	139.538		573
													462.5	7799	0.4625	16862.7	64.7761	1.50038	0.00315889	0.00314636	0.0031422	0.00315471	0.00317563	0.00321347	0.00326857	0.00334142	0.00341951		64.5715	64.5723	64.5726	64.5718	64.5704	64.568	64.5644	64.5597	64.5546												574
													463	7394.25	0.463	15970.3	61.3481	1.50033	0.00315716	0.00314464	0.00314047	0.00315298	0.0031739	0.00321173	0.00326682	0.00333964	0.00341772		61.1544	61.1552	61.1554	61.1547	61.1534	61.1511	61.1477	61.1432	61.1384		125.726	125.728	125.728	125.726	125.724	125.719	125.712	125.703	125.693		575
													463.5	6997.07	0.4635	15096.2	57.9901	1.50029	0.00315544	0.00314292	0.00313876	0.00315126	0.00317217	0.00320999	0.00326507	0.00333787	0.00341593		57.8071	57.8079	57.8081	57.8074	57.8062	57.804	57.8008	57.7966	57.792												576
													464	6610.41	0.464	14246.6	54.7266	1.50024	0.00315373	0.00314121	0.00313705	0.00314955	0.00317045	0.00320827	0.00326332	0.00333611	0.00341414		54.554	54.5547	54.5549	54.5542	54.5531	54.551	54.548	54.544	54.5398		112.361	112.363	112.363	112.362	112.359	112.355	112.349	112.341	112.332		577
													464.5	6243.95	0.4645	13442.3	51.637	1.5002	0.00315202	0.00313951	0.00313535	0.00314785	0.00316874	0.00320654	0.00326159	0.00333435	0.00341237		51.4743	51.4749	51.4751	51.4745	51.4734	51.4715	51.4686	51.4649	51.4608												578
													465	5882.88	0.465	12651.3	48.5987	1.50015	0.00315032	0.00313781	0.00313365	0.00314615	0.00316703	0.00320483	0.00325986	0.0033326	0.0034106		48.4456	48.4462	48.4464	48.4458	48.4448	48.4429	48.4403	48.4367	48.4329		99.9199	99.9211	99.9215	99.9203	99.9182	99.9144	99.9089	99.9016	99.8938		579
													465.5	5540.33	0.4655	11901.9	45.7198	1.5001	0.00314862	0.00313612	0.00313196	0.00314445	0.00316533	0.00320312	0.00325813	0.00333086	0.00340884		45.5758	45.5764	45.5766	45.576	45.5751	45.5733	45.5708	45.5675	45.5639												580
													466	5205.17	0.466	11169.9	42.9078	1.50006	0.00314693	0.00313443	0.00313027	0.00314276	0.00316364	0.00320142	0.00325642	0.00332912	0.00340708		42.7728	42.7733	42.7735	42.773	42.7721	42.7705	42.7681	42.765	42.7616		88.3486	88.3497	88.3501	88.349	88.3471	88.3438	88.3389	88.3325	88.3256		581
													466.5	4897.5	0.4665	10498.4	40.3284	1.50001	0.00314525	0.00313276	0.0031286	0.00314108	0.00316196	0.00319972	0.0032547	0.00332739	0.00340533		40.2015	40.202	40.2022	40.2017	40.2008	40.1993	40.1971	40.1942	40.191												582
													467	4635.17	0.467	9925.41	38.1273	1.49997	0.00314358	0.00313108	0.00312692	0.00313941	0.00316028	0.00319803	0.003253	0.00332567	0.00340359		38.0075	38.0079	38.0081	38.0076	38.0068	38.0054	38.0033	38.0005	37.9976		78.209	78.21	78.2103	78.2093	78.2077	78.2047	78.2004	78.1947	78.1886		583
													467.5	4390.5	0.4675	9391.44	36.0762	1.49992	0.00314191	0.00312942	0.00312526	0.00313774	0.0031586	0.00319635	0.0032513	0.00332395	0.00340185		35.9628	35.9633	35.9634	35.963	35.9622	35.9608	35.9589	35.9562	35.9534												584
													468	4155.83	0.468	8879.99	34.1114	1.49988	0.00314024	0.00312776	0.0031236	0.00313608	0.00315693	0.00319467	0.00324961	0.00332224	0.00340012		34.0043	34.0048	34.0049	34.0045	34.0038	34.0025	34.0006	33.9981	33.9955		69.9671	69.968	69.9683	69.9674	69.966	69.9633	69.9595	69.9544	69.9489		585
													468.5	3962.33	0.4685	8457.49	32.4885	1.49984	0.00313859	0.0031261	0.00312195	0.00313442	0.00315527	0.003193	0.00324793	0.00332054	0.0033984		32.3865	32.3869	32.387	32.3866	32.386	32.3847	32.3829	32.3806	32.3781												586
													469	3775.5	0.469	8050.11	30.9236	1.49979	0.00313694	0.00312446	0.0031203	0.00313277	0.00315362	0.00319133	0.00324625	0.00331884	0.00339668		30.8266	30.8269	30.8271	30.8267	30.826	30.8249	30.8232	30.8209	30.8185		63.2131	63.2138	63.2141	63.2133	63.212	63.2096	63.2061	63.2015	63.1966		587
													469.5	3622.33	0.4695	7715.3	29.6374	1.49975	0.00313529	0.00312282	0.00311866	0.00313113	0.00315197	0.00318967	0.00324457	0.00331715	0.00339497		29.5445	29.5449	29.545	29.5446	29.544	29.5429	29.5413	29.5391	29.5368												588
													470	3509.43	0.47	7466.88	28.6831	1.4997	0.00313365	0.00312118	0.00311703	0.00312949	0.00315033	0.00318802	0.00324291	0.00331547	0.00339326		28.5933	28.5936	28.5937	28.5934	28.5928	28.5917	28.5901	28.588	28.5858		58.1378	58.1385	58.1387	58.138	58.1368	58.1346	58.1314	58.1272	58.1226		589
													470.5	3389.91	0.4705	7204.9	27.6768	1.49966	0.00313202	0.00311955	0.0031154	0.00312786	0.00314869	0.00318638	0.00324125	0.00331379	0.00339157		27.5901	27.5905	27.5906	27.5902	27.5897	27.5886	27.5871	27.5851	27.5829												590
													471	3285.27	0.471	6975.09	26.794	1.49962	0.0031304	0.00311793	0.00311378	0.00312624	0.00314706	0.00318474	0.00323959	0.00331212	0.00338987		26.7101	26.7105	26.7106	26.7102	26.7097	26.7087	26.7072	26.7053	26.7032		54.3002	54.3009	54.3011	54.3005	54.2993	54.2973	54.2943	54.2903	54.2861		591
													471.5	3183.16	0.4715	6751.13	25.9337	1.49957	0.00312878	0.00311631	0.00311216	0.00312462	0.00314544	0.0031831	0.00323795	0.00331045	0.00338819		25.8526	25.8529	25.853	25.8527	25.8521	25.8512	25.8497	25.8479	25.8458												592
													472	3095.48	0.472	6558.22	25.1926	1.49953	0.00312716	0.0031147	0.00311056	0.00312301	0.00314382	0.00318148	0.00323631	0.00330879	0.00338651		25.1139	25.1142	25.1143	25.114	25.1134	25.1125	25.1111	25.1093	25.1073		50.9664	50.9671	50.9673	50.9666	50.9656	50.9637	50.9609	50.9571	50.9532		593
													472.5	3033.65	0.4725	6420.43	24.6633	1.49949	0.00312556	0.0031131	0.00310895	0.0031214	0.00314221	0.00317985	0.00323467	0.00330714	0.00338484		24.5863	24.5866	24.5867	24.5864	24.5858	24.5849	24.5836	24.5818	24.5799												594
													473	2970.71	0.473	6280.56	24.1261	1.49944	0.00312395	0.0031115	0.00310735	0.0031198	0.0031406	0.00317824	0.00323304	0.00330549	0.00338317		24.0507	24.051	24.0511	24.0508	24.0503	24.0494	24.0481	24.0463	24.0444		48.637	48.6376	48.6378	48.6372	48.6361	48.6343	48.6316	48.6281	48.6243		595
													473.5	2910.52	0.4735	6146.82	23.6123	1.4994	0.00312236	0.00310991	0.00310576	0.00311821	0.003139	0.00317663	0.00323142	0.00330385	0.00338151		23.5386	23.5389	23.539	23.5387	23.5382	23.5373	23.536	23.5343	23.5325												596
													474	2869.12	0.474	6053	23.2519	1.49936	0.00312077	0.00310832	0.00310418	0.00311662	0.00313741	0.00317503	0.0032298	0.00330222	0.00337986		23.1793	23.1796	23.1797	23.1794	23.1789	23.1781	23.1768	23.1751	23.1733		46.7179	46.7185	46.7187	46.7181	46.7171	46.7154	46.7128	46.7094	46.7058		597
													474.5	2818.12	0.4745	5939.14	22.8145	1.49931	0.00311919	0.00310674	0.0031026	0.00311503	0.00313582	0.00317343	0.00322819	0.00330059	0.00337821		22.7433	22.7436	22.7437	22.7434	22.743	22.7421	22.7409	22.7392	22.7374												598
													475	2763.55	0.475	5818	22.3492	1.49927	0.00311761	0.00310517	0.00310103	0.00311346	0.00313424	0.00317184	0.00322659	0.00329896	0.00337657		22.2795	22.2798	22.2799	22.2796	22.2791	22.2783	22.2771	22.2754	22.2737		45.0228	45.0234	45.0236	45.023	45.0221	45.0204	45.0179	45.0146	45.0111		599
													475.5	2734.24	0.4755	5750.24	22.0889	1.49923	0.00311604	0.0031036	0.00309946	0.00311189	0.00313266	0.00317025	0.00322499	0.00329735	0.00337494		22.0201	22.0203	22.0204	22.0202	22.0197	22.0189	22.0177	22.0161	22.0143												600
													476	2693.17	0.476	5657.93	21.7343	1.49919	0.00311447	0.00310204	0.0030979	0.00311032	0.00313109	0.00316867	0.0032234	0.00329574	0.00337331		21.6666	21.6669	21.6669	21.6667	21.6662	21.6654	21.6642	21.6626	21.661		43.6866	43.6872	43.6874	43.6868	43.6859	43.6843	43.6819	43.6787	43.6753		601
													476.5	2637.87	0.4765	5535.92	21.2656	1.49914	0.00311291	0.00310048	0.00309634	0.00310876	0.00312953	0.0031671	0.00322181	0.00329413	0.00337168		21.1994	21.1997	21.1998	21.1995	21.1991	21.1983	21.1971	21.1956	21.1939												602
													477	2610.21	0.477	5472.15	21.0206	1.4991	0.00311136	0.00309893	0.00309479	0.00310721	0.00312797	0.00316553	0.00322023	0.00329253	0.00337007		20.9552	20.9555	20.9556	20.9553	20.9549	20.9541	20.9529	20.9514	20.9498		42.1546	42.1551	42.1553	42.1548	42.1539	42.1523	42.15	42.147	42.1437		603
													477.5	2574.98	0.4775	5392.63	20.7152	1.49906	0.00310981	0.00309738	0.00309325	0.00310566	0.00312642	0.00316397	0.00321865	0.00329094	0.00336846		20.6507	20.651	20.6511	20.6508	20.6504	20.6496	20.6485	20.647	20.6454												604
													478	2518.91	0.478	5269.68	20.2429	1.49902	0.00310827	0.00309584	0.00309171	0.00310412	0.00312487	0.00316242	0.00321708	0.00328936	0.00336685		20.1799	20.1802	20.1803	20.18	20.1796	20.1789	20.1777	20.1763	20.1747		40.8307	40.8312	40.8314	40.8309	40.83	40.8285	40.8262	40.8233	40.8201		605
													478.5	2489.08	0.4785	5201.84	19.9823	1.49898	0.00310673	0.00309431	0.00309018	0.00310259	0.00312333	0.00316087	0.00321552	0.00328778	0.00336525		19.9202	19.9204	19.9205	19.9203	19.9199	19.9191	19.918	19.9166	19.915												606
													479	2459.68	0.479	5135.03	19.7256	1.49894	0.0031052	0.00309278	0.00308865	0.00310106	0.0031218	0.00315932	0.00321396	0.0032862	0.00336366		19.6644	19.6646	19.6647	19.6645	19.6641	19.6633	19.6622	19.6608	19.6593		39.5846	39.5851	39.5852	39.5847	39.5839	39.5824	39.5802	39.5774	39.5743		607
													479.5	2425.12	0.4795	5057.61	19.4282	1.4989	0.00310367	0.00309126	0.00308713	0.00309953	0.00312027	0.00315778	0.00321241	0.00328463	0.00336207		19.3679	19.3682	19.3683	19.368	19.3676	19.3669	19.3658	19.3644	19.3629												608
													480	2398.49	0.48	4996.86	19.1949	1.49885	0.00310215	0.00308974	0.00308561	0.00309801	0.00311874	0.00315625	0.00321087	0.00328307	0.00336049		19.1353	19.1356	19.1356	19.1354	19.135	19.1343	19.1332	19.1318	19.1304		38.5033	38.5037	38.5039	38.5034	38.5026	38.5012	38.4991	38.4963	38.4933		609
													480.5	2348.39	0.4805	4887.38	18.7743	1.49881	0.00310064	0.00308823	0.0030841	0.0030965	0.00311723	0.00315472	0.00320933	0.00328151	0.00335892		18.7161	18.7163	18.7164	18.7162	18.7158	18.7151	18.7141	18.7127	18.7113												610
													481	2314.01	0.481	4810.84	18.4803	1.49877	0.00309913	0.00308673	0.0030826	0.00309499	0.00311571	0.0031532	0.00320779	0.00327996	0.00335735		18.423	18.4232	18.4233	18.4231	18.4227	18.422	18.421	18.4197	18.4182		37.1391	37.1396	37.1397	37.1393	37.1385	37.1371	37.1351	37.1324	37.1295		611
													481.5	2312.69	0.4815	4803.1	18.4506	1.49873	0.00309763	0.00308523	0.0030811	0.00309349	0.00311421	0.00315169	0.00320626	0.00327842	0.00335578		18.3934	18.3936	18.3937	18.3935	18.3931	18.3924	18.3914	18.3901	18.3886												612
													482	2288	0.482	4746.89	18.2346	1.49869	0.00309613	0.00308373	0.00307961	0.003092	0.00311271	0.00315018	0.00320474	0.00327688	0.00335423		18.1782	18.1784	18.1785	18.1782	18.1779	18.1772	18.1762	18.1749	18.1735		36.5716	36.572	36.5722	36.5717	36.571	36.5696	36.5676	36.5649	36.5621		613
													482.5	2259.6	0.4825	4683.11	17.9896	1.49865	0.00309464	0.00308225	0.00307812	0.00309051	0.00311121	0.00314867	0.00320322	0.00327534	0.00335267		17.934	17.9342	17.9342	17.934	17.9337	17.933	17.932	17.9307	17.9293												614
													483	2244.43	0.483	4646.85	17.8503	1.49861	0.00309316	0.00308076	0.00307664	0.00308902	0.00310972	0.00314718	0.00320171	0.00327381	0.00335113		17.7951	17.7953	17.7954	17.7952	17.7948	17.7941	17.7932	17.7919	17.7905		35.7291	35.7295	35.7297	35.7292	35.7285	35.7271	35.7252	35.7226	35.7198		615
													483.5	2263.05	0.4835	4680.55	17.9798	1.49857	0.00309168	0.00307929	0.00307516	0.00308754	0.00310824	0.00314568	0.00320021	0.00327229	0.00334959		17.9242	17.9244	17.9245	17.9243	17.9239	17.9232	17.9223	17.921	17.9196												616
													484	2292.07	0.484	4735.69	18.1916	1.49853	0.0030902	0.00307781	0.00307369	0.00308607	0.00310676	0.00314419	0.00319871	0.00327077	0.00334805		18.1354	18.1356	18.1357	18.1355	18.1351	18.1344	18.1334	18.1321	18.1307		36.0596	36.06	36.0602	36.0597	36.059	36.0576	36.0557	36.0531	36.0503		617
													484.5	2336.97	0.4845	4823.47	18.5288	1.49849	0.00308873	0.00307635	0.00307223	0.0030846	0.00310529	0.00314271	0.00319721	0.00326926	0.00334652		18.4716	18.4718	18.4719	18.4717	18.4713	18.4706	18.4696	18.4682	18.4668												618
													485	2362.31	0.485	4870.75	18.7104	1.49845	0.00308727	0.00307489	0.00307077	0.00308314	0.00310382	0.00314124	0.00319572	0.00326776	0.003345		18.6527	18.6529	18.653	18.6527	18.6523	18.6516	18.6506	18.6493	18.6478		37.1242	37.1247	37.1249	37.1244	37.1236	37.1222	37.1202	37.1175	37.1147		619
													485.5	2386.21	0.4855	4914.95	18.8802	1.49841	0.00308581	0.00307343	0.00306931	0.00308168	0.00310236	0.00313977	0.00319424	0.00326626	0.00334348		18.8219	18.8222	18.8223	18.822	18.8216	18.8209	18.8199	18.8185	18.8171												620
													486	2422.51	0.486	4984.6	19.1477	1.49837	0.00308436	0.00307198	0.00306786	0.00308023	0.0031009	0.0031383	0.00319276	0.00326476	0.00334197		19.0887	19.0889	19.089	19.0888	19.0884	19.0877	19.0866	19.0852	19.0838		37.9106	37.9111	37.9113	37.9108	37.91	37.9086	37.9065	37.9038	37.9008		621
													486.5	2446.05	0.4865	5027.85	19.3139	1.49833	0.00308291	0.00307054	0.00306642	0.00307878	0.00309945	0.00313684	0.00319129	0.00326327	0.00334046		19.2543	19.2546	19.2547	19.2544	19.254	19.2533	19.2523	19.2509	19.2494												622
													487	2508.01	0.487	5149.91	19.7828	1.4983	0.00308147	0.0030691	0.00306498	0.00307734	0.003098	0.00313538	0.00318982	0.00326179	0.00333896		19.7218	19.7221	19.7222	19.7219	19.7215	19.7208	19.7197	19.7183	19.7167		38.9762	38.9767	38.9768	38.9763	38.9755	38.9741	38.9719	38.9691	38.9661		623
													487.5	2595.55	0.4875	5324.2	20.4523	1.49826	0.00308003	0.00306766	0.00306355	0.0030759	0.00309656	0.00313393	0.00318836	0.00326031	0.00333747		20.3893	20.3896	20.3897	20.3894	20.389	20.3882	20.3871	20.3856	20.3841												624
													488	2672.33	0.488	5476.09	21.0358	1.49822	0.0030786	0.00306623	0.00306212	0.00307447	0.00309512	0.00313249	0.0031869	0.00325884	0.00333598		20.971	20.9713	20.9714	20.9711	20.9707	20.9699	20.9687	20.9672	20.9656		41.3603	41.3609	41.361	41.3605	41.3597	41.3581	41.3558	41.3529	41.3497		625
													488.5	2740.2	0.4885	5609.42	21.5479	1.49818	0.00307717	0.00306481	0.0030607	0.00307305	0.00309369	0.00313105	0.00318545	0.00325737	0.00333449		21.4816	21.4819	21.482	21.4817	21.4813	21.4805	21.4793	21.4777	21.4761												626
													489	2812.27	0.489	5751.06	22.092	1.49814	0.00307575	0.00306339	0.00305928	0.00307163	0.00309227	0.00312962	0.003184	0.00325591	0.00333301		22.0241	22.0243	22.0244	22.0242	22.0237	22.0229	22.0217	22.0201	22.0184		43.5057	43.5062	43.5064	43.5059	43.505	43.5033	43.501	43.4978	43.4945		627
													489.5	2906	0.4895	5936.67	22.805	1.4981	0.00307433	0.00306198	0.00305787	0.00307021	0.00309085	0.00312819	0.00318256	0.00325445	0.00333154		22.7349	22.7352	22.7353	22.735	22.7345	22.7337	22.7325	22.7308	22.7291												628
													490	3003.13	0.49	6128.84	23.5432	1.49806	0.00307292	0.00306057	0.00305646	0.0030688	0.00308943	0.00312677	0.00318113	0.003253	0.00333007		23.4709	23.4712	23.4713	23.471	23.4705	23.4696	23.4684	23.4667	23.4648		46.2058	46.2064	46.2066	46.206	46.2051	46.2033	46.2008	46.1975	46.1939		629
													490.5	3111.53	0.4905	6343.59	24.3682	1.49803	0.00307152	0.00305917	0.00305506	0.0030674	0.00308803	0.00312535	0.0031797	0.00325155	0.00332861		24.2933	24.2936	24.2937	24.2934	24.2929	24.292	24.2907	24.289	24.2871												630
													491	3244.73	0.491	6608.42	25.3855	1.49799	0.00307012	0.00305777	0.00305366	0.003066	0.00308662	0.00312394	0.00317827	0.00325011	0.00332715		25.3075	25.3079	25.308	25.3076	25.3071	25.3062	25.3048	25.303	25.301		49.6009	49.6015	49.6017	49.6011	49.6001	49.5982	49.5955	49.5919	49.5881		631
													491.5	3370.64	0.4915	6857.86	26.3437	1.49795	0.00306872	0.00305638	0.00305227	0.0030646	0.00308522	0.00312253	0.00317685	0.00324868	0.0033257		26.2629	26.2632	26.2633	26.263	26.2624	26.2614	26.26	26.2581	26.2561												632
													492	3480.52	0.492	7074.23	27.1748	1.49791	0.00306733	0.00305499	0.00305088	0.00306321	0.00308383	0.00312113	0.00317544	0.00324725	0.00332425		27.0915	27.0918	27.0919	27.0916	27.091	27.09	27.0885	27.0866	27.0845		53.3543	53.355	53.3552	53.3546	53.3535	53.3515	53.3485	53.3447	53.3406		633
													492.5	3604.99	0.4925	7319.77	28.1181	1.49787	0.00306594	0.00305361	0.0030495	0.00306183	0.00308244	0.00311973	0.00317403	0.00324582	0.00332281		28.0318	28.0322	28.0323	28.032	28.0314	28.0303	28.0288	28.0268	28.0246												634
													493	3756.81	0.493	7620.3	29.2725	1.49784	0.00306456	0.00305223	0.00304812	0.00306045	0.00308105	0.00311834	0.00317263	0.0032444	0.00332137		29.1828	29.1831	29.1833	29.1829	29.1823	29.1812	29.1796	29.1775	29.1753		57.2146	57.2153	57.2156	57.2149	57.2137	57.2115	57.2084	57.2043	57.1999		635
													493.5	3913.12	0.4935	7929.32	30.4596	1.4978	0.00306319	0.00305086	0.00304675	0.00305908	0.00307968	0.00311695	0.00317123	0.00324299	0.00331994		30.3663	30.3666	30.3668	30.3664	30.3658	30.3646	30.363	30.3608	30.3585												636
													494	4035.02	0.494	8168.06	31.3767	1.49776	0.00306182	0.00304949	0.00304539	0.00305771	0.0030783	0.00311557	0.00316983	0.00324158	0.00331852		31.2806	31.281	31.2811	31.2807	31.2801	31.2789	31.2772	31.2749	31.2725		61.6469	61.6476	61.6479	61.6471	61.6458	61.6435	61.6402	61.6357	61.631		637
													494.5	4198.17	0.4945	8489.72	32.6123	1.49773	0.00306045	0.00304813	0.00304402	0.00305634	0.00307693	0.00311419	0.00316844	0.00324017	0.00331709		32.5125	32.5129	32.513	32.5126	32.5119	32.5107	32.509	32.5066	32.5041												638
													495	4374.37	0.495	8837.12	33.9468	1.49769	0.00305909	0.00304677	0.00304267	0.00305498	0.00307557	0.00311282	0.00316706	0.00323877	0.00331568		33.8429	33.8433	33.8435	33.8431	33.8424	33.8411	33.8393	33.8368	33.8342		66.3554	66.3562	66.3565	66.3557	66.3543	66.3518	66.3482	66.3434	66.3383		639
													495.5	4539.52	0.4955	9161.49	35.1928	1.49765	0.00305774	0.00304542	0.00304132	0.00305363	0.00307421	0.00311145	0.00316568	0.00323738	0.00331427		35.0852	35.0856	35.0858	35.0854	35.0846	35.0833	35.0814	35.0789	35.0762												640
													496	4714.01	0.496	9504.06	36.5087	1.49762	0.00305639	0.00304407	0.00303997	0.00305228	0.00307286	0.00311009	0.00316431	0.00323599	0.00331286		36.3972	36.3976	36.3978	36.3973	36.3966	36.3952	36.3932	36.3906	36.3878		71.4824	71.4833	71.4836	71.4827	71.4812	71.4785	71.4746	71.4695	71.464		641
													496.5	4871.15	0.4965	9810.97	37.6877	1.49758	0.00305504	0.00304273	0.00303863	0.00305093	0.00307151	0.00310873	0.00316294	0.00323461	0.00331146		37.5726	37.573	37.5732	37.5727	37.572	37.5706	37.5685	37.5658	37.5629												642
													497	5061.88	0.497	10184.9	39.124	1.49754	0.0030537	0.00304139	0.00303729	0.00304959	0.00307016	0.00310738	0.00316157	0.00323323	0.00331007		39.0045	39.005	39.0052	39.0047	39.0039	39.0024	39.0003	38.9975	38.9945		76.5771	76.5781	76.5784	76.5774	76.5758	76.573	76.5688	76.5633	76.5574		643
													497.5	5270.53	0.4975	10594	40.6958	1.49751	0.00305237	0.00304005	0.00303596	0.00304826	0.00306882	0.00310603	0.00316021	0.00323185	0.00330868		40.5716	40.5721	40.5722	40.5717	40.5709	40.5694	40.5672	40.5643	40.5611												644
													498	5456.63	0.498	10957.1	42.0904	1.49747	0.00305103	0.00303873	0.00303463	0.00304693	0.00306749	0.00310469	0.00315886	0.00323048	0.00330729		41.962	41.9625	41.9626	41.9621	41.9613	41.9597	41.9574	41.9544	41.9512		82.5335	82.5345	82.5349	82.5339	82.5321	82.5291	82.5246	82.5187	82.5123		645
													498.5	5644.25	0.4985	11322.5	43.494	1.49743	0.00304971	0.0030374	0.00303331	0.0030456	0.00306616	0.00310335	0.00315751	0.00322912	0.00330591		43.3613	43.3619	43.3621	43.3615	43.3606	43.359	43.3566	43.3535	43.3502												646
													499	5861.28	0.499	11746.1	45.1211	1.4974	0.00304839	0.00303608	0.00303199	0.00304428	0.00306483	0.00310202	0.00315617	0.00322776	0.00330453		44.9836	44.9841	44.9843	44.9837	44.9828	44.9811	44.9787	44.9755	44.972		88.3449	88.346	88.3464	88.3453	88.3434	88.3401	88.3353	88.329	88.3222		647
													499.5	6066.21	0.4995	12144.6	46.6519	1.49736	0.00304707	0.00303477	0.00303068	0.00304297	0.00306351	0.00310069	0.00315483	0.0032264	0.00330316		46.5098	46.5103	46.5105	46.51	46.509	46.5073	46.5047	46.5014	46.4978												648
													500	6290.85	0.5	12581.7	48.3311	1.49733	0.00304576	0.00303346	0.00302937	0.00304166	0.0030622	0.00309937	0.00315349	0.00322505	0.0033018		48.1839	48.1845	48.1847	48.1841	48.1831	48.1813	48.1787	48.1753	48.1715		94.6937	94.6949	94.6953	94.6941	94.6921	94.6886	94.6835	94.6767	94.6694		649
													500.5	6553.23	0.5005	13093.4	50.2966	1.49729	0.00304445	0.00303216	0.00302806	0.00304035	0.00306089	0.00309805	0.00315216	0.00322371	0.00330044		50.1435	50.1441	50.1443	50.1437	50.1427	50.1408	50.1381	50.1345	50.1306												650
													501	6753.34	0.501	13479.7	51.7808	1.49726	0.00304315	0.00303086	0.00302676	0.00303905	0.00305958	0.00309673	0.00315084	0.00322237	0.00329908		51.6232	51.6239	51.6241	51.6234	51.6224	51.6204	51.6176	51.6139	51.61		101.767	101.768	101.768	101.767	101.765	101.761	101.756	101.748	101.741		651
													501.5	6937.11	0.5015	13832.7	53.1368	1.49722	0.00304185	0.00302956	0.00302547	0.00303775	0.00305828	0.00309542	0.00314952	0.00322103	0.00329773		52.9752	52.9758	52.9761	52.9754	52.9743	52.9723	52.9695	52.9657	52.9616												652
													502	7198.48	0.502	14339.6	55.0839	1.49718	0.00304056	0.00302827	0.00302418	0.00303646	0.00305698	0.00309412	0.0031482	0.0032197	0.00329638		54.9164	54.9171	54.9173	54.9167	54.9155	54.9135	54.9105	54.9066	54.9024		107.892	107.893	107.893	107.892	107.89	107.886	107.88	107.872	107.864		653
													502.5	7427.85	0.5025	14781.8	56.7826	1.49715	0.00303927	0.00302698	0.00302289	0.00303517	0.00305569	0.00309282	0.00314689	0.00321838	0.00329504		56.61	56.6107	56.6109	56.6102	56.6091	56.607	56.6039	56.5998	56.5955												654
													503	7664.72	0.503	15238	58.5351	1.49711	0.00303798	0.0030257	0.00302161	0.00303389	0.0030544	0.00309152	0.00314558	0.00321706	0.0032937		58.3572	58.358	58.3582	58.3575	58.3563	58.3541	58.3509	58.3468	58.3423		114.967	114.969	114.969	114.968	114.965	114.961	114.955	114.947	114.938		655
													503.5	7889.35	0.5035	15669	60.1907	1.49708	0.0030367	0.00302442	0.00302034	0.00303261	0.00305312	0.00309023	0.00314428	0.00321574	0.00329237		60.0079	60.0087	60.0089	60.0082	60.0069	60.0047	60.0014	59.9971	59.9925												656
													504	8129.57	0.504	16130.1	61.9619	1.49704	0.00303543	0.00302315	0.00301907	0.00303133	0.00305184	0.00308895	0.00314298	0.00321443	0.00329105		61.7739	61.7746	61.7749	61.7741	61.7728	61.7705	61.7672	61.7628	61.758		121.782	121.783	121.784	121.782	121.78	121.775	121.769	121.76	121.751		657
													504.5	8378.27	0.5045	16607.1	63.7942	1.49701	0.00303416	0.00302188	0.0030178	0.00303006	0.00305057	0.00308767	0.00314169	0.00321312	0.00328972		63.6006	63.6014	63.6016	63.6009	63.5995	63.5972	63.5937	63.5892	63.5843												658
													505	8601.1	0.505	17031.9	65.426	1.49698	0.00303289	0.00302062	0.00301654	0.0030288	0.0030493	0.00308639	0.0031404	0.00321182	0.0032884		65.2276	65.2284	65.2287	65.2278	65.2265	65.2241	65.2205	65.2159	65.2109		128.828	128.83	128.83	128.829	128.826	128.821	128.814	128.805	128.795		659
													505.5	8816.17	0.5055	17440.5	66.9956	1.49694	0.00303163	0.00301936	0.00301528	0.00302754	0.00304803	0.00308512	0.00313912	0.00321052	0.00328709		66.7925	66.7933	66.7936	66.7928	66.7914	66.7889	66.7853	66.7805	66.7754												660
													506	9075.13	0.506	17935	68.8954	1.49691	0.00303037	0.00301811	0.00301402	0.00302628	0.00304677	0.00308385	0.00313784	0.00320923	0.00328578		68.6866	68.6875	68.6878	68.6869	68.6855	68.683	68.6792	68.6743	68.669		135.479	135.481	135.481	135.48	135.477	135.472	135.465	135.455	135.444		661
													506.5	9356.07	0.5065	18472	70.9581	1.49687	0.00302912	0.00301686	0.00301277	0.00302503	0.00304552	0.00308258	0.00313656	0.00320794	0.00328448		70.7431	70.744	70.7443	70.7434	70.7419	70.7393	70.7355	70.7304	70.725												662
													507	9594.17	0.507	18923.4	72.6921	1.49684	0.00302787	0.00301561	0.00301153	0.00302378	0.00304426	0.00308132	0.00313529	0.00320665	0.00328318		72.472	72.4729	72.4732	72.4723	72.4708	72.4681	72.4642	72.459	72.4534		143.215	143.217	143.217	143.216	143.213	143.207	143.2	143.189	143.178		663
													507.5	9829.82	0.5075	19369.1	74.4042	1.4968	0.00302663	0.00301437	0.00301029	0.00302254	0.00304302	0.00308007	0.00313403	0.00320537	0.00328188		74.179	74.1799	74.1802	74.1793	74.1778	74.175	74.171	74.1657	74.16												664
													508	10048.9	0.508	19781.4	75.9879	1.49677	0.00302539	0.00301313	0.00300905	0.0030213	0.00304177	0.00307882	0.00313277	0.0032041	0.00328059		75.758	75.759	75.7593	75.7584	75.7568	75.754	75.7499	75.7445	75.7387		149.937	149.939	149.94	149.938	149.935	149.929	149.921	149.91	149.899		665
													508.5	10263	0.5085	20182.9	77.5302	1.49674	0.00302415	0.0030119	0.00300782	0.00302007	0.00304054	0.00307757	0.00313151	0.00320283	0.00327931		77.2957	77.2966	77.297	77.296	77.2944	77.2915	77.2874	77.2818	77.2759												666
													509	10524.9	0.509	20677.6	79.4306	1.4967	0.00302292	0.00301067	0.00300659	0.00301884	0.0030393	0.00307633	0.00313026	0.00320156	0.00327803		79.1905	79.1914	79.1918	79.1908	79.1892	79.1862	79.1819	79.1763	79.1702		156.486	156.488	156.489	156.487	156.484	156.478	156.469	156.458	156.446		667
													509.5	10747.3	0.5095	21093.8	81.0293	1.49667	0.0030217	0.00300945	0.00300537	0.00301761	0.00303807	0.00307509	0.00312901	0.0032003	0.00327675		80.7845	80.7855	80.7858	80.7848	80.7831	80.7801	80.7758	80.77	80.7638												668
													510	10934.4	0.51	21439.9	82.359	1.49664	0.00302047	0.00300823	0.00300415	0.00301639	0.00303685	0.00307386	0.00312777	0.00319904	0.00327548		82.1102	82.1112	82.1116	82.1106	82.1089	82.1058	82.1014	82.0955	82.0892		162.895	162.897	162.897	162.895	162.892	162.886	162.877	162.866	162.853		669
													510.5	11173.7	0.5105	21887.8	84.0794	1.4966	0.00301926	0.00300701	0.00300294	0.00301517	0.00303562	0.00307263	0.00312653	0.00319779	0.00327421		83.8256	83.8266	83.827	83.8259	83.8242	83.8211	83.8166	83.8106	83.8041												670
													511	11412.7	0.511	22334.1	85.7937	1.49657	0.00301804	0.0030058	0.00300172	0.00301396	0.00303441	0.00307141	0.00312529	0.00319654	0.00327294		85.5348	85.5359	85.5362	85.5352	85.5334	85.5302	85.5256	85.5195	85.5129		169.36	169.362	169.363	169.361	169.358	169.351	169.342	169.33	169.317		671
													511.5	11615.5	0.5115	22708.7	87.233	1.49654	0.00301683	0.00300459	0.00300052	0.00301275	0.00303319	0.00307019	0.00312406	0.00319529	0.00327169		86.9698	86.9709	86.9713	86.9702	86.9684	86.9652	86.9605	86.9543	86.9476												672
													512	11791.4	0.512	23030	88.467	1.4965	0.00301563	0.00300339	0.00299932	0.00301154	0.00303199	0.00306897	0.00312283	0.00319405	0.00327043		88.2003	88.2013	88.2017	88.2006	88.1988	88.1955	88.1908	88.1845	88.1777		175.17	175.172	175.173	175.171	175.167	175.161	175.151	175.139	175.125		673
													512.5	12024.8	0.5125	23463	90.1305	1.49647	0.00301443	0.00300219	0.00299812	0.00301034	0.00303078	0.00306776	0.00312161	0.00319282	0.00326918		89.8588	89.8599	89.8602	89.8591	89.8573	89.854	89.8491	89.8427	89.8358												674
													513	12231.5	0.513	23843	91.5902	1.49644	0.00301323	0.003001	0.00299692	0.00300915	0.00302958	0.00306655	0.00312039	0.00319158	0.00326793		91.3142	91.3153	91.3157	91.3146	91.3127	91.3093	91.3044	91.2979	91.2909		181.173	181.175	181.176	181.174	181.17	181.163	181.154	181.141	181.127		675
													513.5	12440.9	0.5135	24227.7	93.0678	1.49641	0.00301204	0.00299981	0.00299573	0.00300796	0.00302838	0.00306535	0.00311918	0.00319036	0.00326669		92.7875	92.7886	92.789	92.7879	92.786	92.7825	92.7775	92.7709	92.7638												676
													514	12629	0.514	24570.1	94.3832	1.49637	0.00301085	0.00299862	0.00299455	0.00300677	0.00302719	0.00306415	0.00311797	0.00318913	0.00326545		94.099	94.1002	94.1005	94.0994	94.0975	94.094	94.0889	94.0822	94.075		186.886	186.889	186.89	186.887	186.883	186.876	186.866	186.853	186.839		677
													514.5	12792.1	0.5145	24863.2	95.5092	1.49634	0.00300966	0.00299744	0.00299337	0.00300558	0.003026	0.00306295	0.00311677	0.00318792	0.00326422		95.2218	95.223	95.2234	95.2222	95.2202	95.2167	95.2116	95.2048	95.1975												678
													515	12982.9	0.515	25209.5	96.8393	1.49631	0.00300848	0.00299626	0.00299219	0.0030044	0.00302482	0.00306176	0.00311556	0.0031867	0.00326299		96.548	96.5491	96.5495	96.5484	96.5464	96.5428	96.5376	96.5307	96.5233		191.77	191.772	191.773	191.771	191.767	191.76	191.749	191.735	191.721		679
													515.5	13173.5	0.5155	25554.8	98.1659	1.49628	0.0030073	0.00299508	0.00299102	0.00300323	0.00302364	0.00306058	0.00311437	0.00318549	0.00326177		97.8707	97.8719	97.8723	97.8711	97.8691	97.8654	97.8602	97.8532	97.8457												680
													516	13322.2	0.516	25818.2	99.1778	1.49624	0.00300613	0.00299391	0.00298985	0.00300206	0.00302247	0.00305939	0.00311317	0.00318428	0.00326055		98.8797	98.8809	98.8813	98.8801	98.8781	98.8744	98.8691	98.862	98.8545		196.75	196.753	196.754	196.751	196.747	196.74	196.729	196.715	196.7		681
													516.5	13478.7	0.5165	26096.2	100.246	1.49621	0.00300496	0.00299275	0.00298868	0.00300089	0.00302129	0.00305822	0.00311198	0.00318308	0.00325933		99.9443	99.9455	99.9459	99.9447	99.9427	99.939	99.9336	99.9265	99.9188												682
													517	13667.2	0.517	26435.6	101.549	1.49618	0.0030038	0.00299159	0.00298752	0.00299972	0.00302013	0.00305704	0.0031108	0.00318188	0.00325812		101.244	101.245	101.246	101.245	101.243	101.239	101.233	101.226	101.218		201.189	201.191	201.192	201.189	201.185	201.178	201.167	201.153	201.137		683
													517.5	13848.4	0.5175	26760.2	102.796	1.49615	0.00300264	0.00299043	0.00298636	0.00299857	0.00301896	0.00305587	0.00310962	0.00318069	0.00325691		102.488	102.489	102.489	102.488	102.486	102.482	102.477	102.469	102.461												684
													518	14023.1	0.518	27071.6	103.993	1.49612	0.00300148	0.00298927	0.00298521	0.00299741	0.0030178	0.0030547	0.00310844	0.0031795	0.0032557		103.68	103.682	103.682	103.681	103.679	103.675	103.669	103.662	103.654		206.168	206.171	206.171	206.169	206.165	206.157	206.146	206.131	206.115		685
													518.5	14142.2	0.5185	27275.3	104.775	1.49609	0.00300033	0.00298812	0.00298406	0.00299626	0.00301665	0.00305354	0.00310727	0.00317831	0.0032545		104.461	104.462	104.462	104.461	104.459	104.455	104.449	104.442	104.434												686
													519	14235.5	0.519	27428.8	105.365	1.49605	0.00299918	0.00298698	0.00298291	0.00299511	0.00301549	0.00305238	0.0031061	0.00317713	0.00325331		105.049	105.05	105.05	105.049	105.047	105.043	105.037	105.03	105.022		209.509	209.512	209.513	209.51	209.506	209.498	209.487	209.472	209.456		687
													519.5	14390.9	0.5195	27701.5	106.412	1.49602	0.00299804	0.00298583	0.00298177	0.00299397	0.00301435	0.00305123	0.00310493	0.00317595	0.00325212		106.093	106.094	106.095	106.094	106.091	106.087	106.082	106.074	106.066												688
													520	14509.9	0.52	27903.7	107.189	1.49599	0.00299689	0.0029847	0.00298064	0.00299283	0.0030132	0.00305008	0.00310377	0.00317478	0.00325093		106.868	106.869	106.869	106.868	106.866	106.862	106.856	106.849	106.84		212.961	212.963	212.964	212.962	212.957	212.949	212.938	212.923	212.907		689
													520.5	14661.8	0.5205	28168.7	108.207	1.49596	0.00299576	0.00298356	0.0029795	0.00299169	0.00301206	0.00304893	0.00310262	0.00317361	0.00324974		107.883	107.884	107.884	107.883	107.881	107.877	107.871	107.863	107.855												690
													521	14754.7	0.521	28320	108.788	1.49593	0.00299462	0.00298243	0.00297837	0.00299056	0.00301093	0.00304779	0.00310146	0.00317244	0.00324856		108.462	108.464	108.464	108.463	108.461	108.457	108.451	108.443	108.435		216.345	216.348	216.348	216.346	216.341	216.333	216.322	216.306	216.29		691
													521.5	14890.9	0.5215	28553.9	109.687	1.4959	0.00299349	0.0029813	0.00297724	0.00298943	0.00300979	0.00304665	0.00310031	0.00317128	0.00324739		109.358	109.36	109.36	109.359	109.357	109.353	109.347	109.339	109.33												692
													522	15010.3	0.522	28755.3	110.46	1.49587	0.00299237	0.00298018	0.00297612	0.0029883	0.00300867	0.00304551	0.00309917	0.00317012	0.00324621		110.13	110.131	110.131	110.13	110.128	110.124	110.118	110.11	110.102		219.488	219.491	219.492	219.489	219.484	219.476	219.465	219.449	219.432		693
													522.5	15150.8	0.5225	28996.8	111.388	1.49584	0.00299125	0.00297906	0.002975	0.00298718	0.00300754	0.00304438	0.00309803	0.00316897	0.00324505		111.055	111.056	111.056	111.055	111.053	111.049	111.043	111.035	111.026												694
													523	15239.6	0.523	29138.9	111.934	1.49581	0.00299013	0.00297794	0.00297389	0.00298606	0.00300642	0.00304325	0.00309689	0.00316782	0.00324388		111.599	111.6	111.601	111.599	111.597	111.593	111.587	111.579	111.57		222.653	222.656	222.657	222.654	222.65	222.642	222.63	222.614	222.597		695
													523.5	15296.1	0.5235	29218.9	112.241	1.49578	0.00298902	0.00297683	0.00297278	0.00298495	0.0030053	0.00304213	0.00309576	0.00316667	0.00324272		111.906	111.907	111.908	111.906	111.904	111.9	111.894	111.886	111.877												696
													524	15417.2	0.524	29422.2	113.022	1.49574	0.0029879	0.00297572	0.00297167	0.00298384	0.00300419	0.00304101	0.00309463	0.00316553	0.00324157		112.684	112.686	112.686	112.685	112.682	112.678	112.672	112.664	112.656		224.59	224.593	224.594	224.591	224.586	224.578	224.566	224.55	224.533		697
													524.5	15526.2	0.5245	29601.8	113.712	1.49571	0.0029868	0.00297462	0.00297057	0.00298274	0.00300308	0.00303989	0.0030935	0.00316439	0.00324041		113.372	113.374	113.374	113.373	113.371	113.366	113.36	113.352	113.344												698
													525	15588.6	0.525	29692.6	114.061	1.49568	0.00298569	0.00297352	0.00296947	0.00298163	0.00300197	0.00303878	0.00309238	0.00316325	0.00323926		113.72	113.722	113.722	113.721	113.718	113.714	113.708	113.7	113.691		227.093	227.095	227.096	227.093	227.089	227.08	227.068	227.052	227.035		699
													525.5	15741.9	0.5255	29956	115.073	1.49565	0.0029846	0.00297242	0.00296837	0.00298053	0.00300087	0.00303767	0.00309126	0.00316212	0.00323812		114.729	114.73	114.731	114.73	114.727	114.723	114.717	114.709	114.7												700
													526	15815	0.526	30066.6	115.497	1.49562	0.0029835	0.00297133	0.00296728	0.00297944	0.00299977	0.00303656	0.00309014	0.00316099	0.00323698		115.153	115.154	115.155	115.153	115.151	115.147	115.14	115.132	115.123		229.882	229.885	229.886	229.883	229.878	229.87	229.857	229.841	229.823		701
													526.5	15844.8	0.5265	30094.6	115.605	1.49559	0.00298241	0.00297024	0.00296619	0.00297835	0.00299868	0.00303546	0.00308903	0.00315987	0.00323584		115.26	115.262	115.262	115.261	115.258	115.254	115.248	115.24	115.231												702
													527	15958.6	0.527	30281.9	116.325	1.49556	0.00298132	0.00296915	0.0029651	0.00297726	0.00299758	0.00303436	0.00308792	0.00315875	0.00323471		115.978	115.979	115.98	115.978	115.976	115.972	115.965	115.957	115.948		231.238	231.241	231.242	231.239	231.234	231.226	231.213	231.197	231.179		703
													527.5	16034.4	0.5275	30397	116.766	1.49553	0.00298023	0.00296807	0.00296402	0.00297618	0.0029965	0.00303327	0.00308682	0.00315763	0.00323358		116.418	116.42	116.42	116.419	116.417	116.412	116.406	116.398	116.389												704
													528	16096	0.528	30484.8	117.104	1.4955	0.00297915	0.00296699	0.00296294	0.00297509	0.00299541	0.00303218	0.00308572	0.00315652	0.00323245		116.755	116.756	116.757	116.755	116.753	116.749	116.743	116.734	116.725		233.173	233.176	233.177	233.174	233.17	233.161	233.149	233.132	233.114		705
													528.5	16155.7	0.5285	30568.9	117.427	1.49547	0.00297807	0.00296591	0.00296187	0.00297402	0.00299433	0.00303109	0.00308462	0.00315541	0.00323133		117.077	117.079	117.079	117.078	117.075	117.071	117.065	117.057	117.048												706
													529	16217.8	0.529	30657.5	117.767	1.49545	0.002977	0.00296484	0.00296079	0.00297294	0.00299325	0.00303001	0.00308353	0.0031543	0.00323021		117.417	117.418	117.419	117.417	117.415	117.41	117.404	117.396	117.387		234.494	234.497	234.498	234.495	234.49	234.482	234.469	234.452	234.434		707
													529.5	16208	0.5295	30610	117.585	1.49542	0.00297593	0.00296377	0.00295973	0.00297187	0.00299218	0.00302893	0.00308244	0.0031532	0.0032291		117.235	117.236	117.237	117.235	117.233	117.229	117.222	117.214	117.205												708
													530	16299.7	0.53	30754.1	118.138	1.49539	0.00297486	0.00296271	0.00295866	0.00297081	0.00299111	0.00302785	0.00308135	0.0031521	0.00322798		117.787	117.788	117.789	117.787	117.785	117.78	117.774	117.766	117.757		235.022	235.024	235.025	235.023	235.018	235.009	234.996	234.98	234.962		709
													530.5	16322.5	0.5305	30768.1	118.192	1.49536	0.0029738	0.00296165	0.0029576	0.00296974	0.00299004	0.00302678	0.00308027	0.00315101	0.00322688		117.841	117.842	117.843	117.841	117.839	117.834	117.828	117.82	117.811												710
													531	16431.2	0.531	30943.8	118.867	1.49533	0.00297274	0.00296059	0.00295654	0.00296869	0.00298898	0.00302571	0.00307919	0.00314992	0.00322577		118.514	118.515	118.516	118.514	118.512	118.507	118.501	118.493	118.484		236.354	236.357	236.358	236.355	236.351	236.342	236.329	236.312	236.294		711
													531.5	16530.3	0.5315	31101.3	119.472	1.4953	0.00297168	0.00295953	0.00295549	0.00296763	0.00298792	0.00302464	0.00307812	0.00314883	0.00322467		119.117	119.118	119.119	119.117	119.115	119.111	119.104	119.096	119.087												712
													532	16613.4	0.532	31228.1	119.959	1.49527	0.00297063	0.00295848	0.00295444	0.00296658	0.00298687	0.00302358	0.00307705	0.00314775	0.00322358		119.603	119.604	119.605	119.603	119.601	119.597	119.59	119.582	119.573		238.72	238.723	238.724	238.721	238.716	238.707	238.694	238.677	238.659		713
													532.5	16694.3	0.5325	31350.7	120.43	1.49524	0.00296958	0.00295744	0.00295339	0.00296553	0.00298581	0.00302252	0.00307598	0.00314667	0.00322248		120.073	120.074	120.075	120.073	120.071	120.066	120.06	120.051	120.042												714
													533	16770.8	0.533	31464.9	120.869	1.49521	0.00296853	0.00295639	0.00295235	0.00296448	0.00298476	0.00302146	0.00307491	0.00314559	0.00322139		120.51	120.512	120.512	120.511	120.508	120.504	120.497	120.489	120.479		240.583	240.586	240.587	240.584	240.579	240.57	240.557	240.54	240.522		715
													533.5	16773.2	0.5335	31440	120.773	1.49518	0.00296749	0.00295535	0.00295131	0.00296344	0.00298372	0.00302041	0.00307385	0.00314452	0.00322031		120.415	120.416	120.417	120.415	120.413	120.408	120.402	120.393	120.384												716
													534	16862.7	0.534	31578.1	121.304	1.49516	0.00296645	0.00295431	0.00295027	0.0029624	0.00298268	0.00301936	0.00307279	0.00314345	0.00321922		120.944	120.945	120.946	120.944	120.942	120.937	120.931	120.922	120.913		241.358	241.361	241.362	241.359	241.354	241.346	241.333	241.316	241.297		717
													534.5	16846.9	0.5345	31519.1	121.077	1.49513	0.00296541	0.00295328	0.00294924	0.00296137	0.00298164	0.00301832	0.00307174	0.00314238	0.00321814		120.718	120.719	120.72	120.718	120.716	120.711	120.705	120.696	120.687												718
													535	16946.7	0.535	31676.1	121.68	1.4951	0.00296438	0.00295225	0.00294821	0.00296033	0.0029806	0.00301728	0.00307069	0.00314132	0.00321707		121.319	121.321	121.321	121.32	121.317	121.313	121.306	121.298	121.288		242.037	242.04	242.041	242.038	242.033	242.024	242.011	241.994	241.976		719
													535.5	16958.2	0.5355	31667.9	121.649	1.49507	0.00296335	0.00295122	0.00294718	0.0029593	0.00297957	0.00301624	0.00306964	0.00314026	0.003216		121.288	121.29	121.29	121.289	121.286	121.282	121.275	121.267	121.257												720
													536	16998.2	0.536	31713.1	121.822	1.49504	0.00296232	0.0029502	0.00294616	0.00295828	0.00297854	0.0030152	0.0030686	0.0031392	0.00321493		121.461	121.463	121.463	121.462	121.459	121.455	121.448	121.44	121.431		242.75	242.752	242.753	242.75	242.746	242.737	242.724	242.706	242.688		721
													536.5	16998.2	0.5365	31683.5	121.709	1.49501	0.0029613	0.00294918	0.00294514	0.00295726	0.00297751	0.00301417	0.00306755	0.00313815	0.00321386		121.348	121.35	121.35	121.349	121.346	121.342	121.335	121.327	121.318												722
													537	17020.1	0.537	31694.8	121.752	1.49499	0.00296028	0.00294816	0.00294412	0.00295624	0.00297649	0.00301314	0.00306652	0.0031371	0.0032128		121.392	121.393	121.394	121.392	121.39	121.385	121.379	121.37	121.361		242.74	242.743	242.744	242.741	242.736	242.727	242.714	242.697	242.678		723
													537.5	17062.1	0.5375	31743.5	121.939	1.49496	0.00295927	0.00294714	0.00294311	0.00295522	0.00297547	0.00301212	0.00306548	0.00313605	0.00321174		121.578	121.58	121.58	121.579	121.576	121.572	121.565	121.557	121.547												724
													538	17038.9	0.538	31670.8	121.66	1.49493	0.00295825	0.00294613	0.0029421	0.00295421	0.00297446	0.00301109	0.00306445	0.00313501	0.00321069		121.3	121.301	121.302	121.3	121.298	121.293	121.287	121.278	121.269		242.878	242.881	242.882	242.879	242.874	242.865	242.852	242.835	242.817		725
													538.5	17045.3	0.5385	31653.3	121.592	1.4949	0.00295724	0.00294512	0.00294109	0.0029532	0.00297344	0.00301007	0.00306342	0.00313397	0.00320963		121.233	121.234	121.235	121.233	121.231	121.226	121.22	121.211	121.202												726
													539	17006.7	0.539	31552.3	121.204	1.49487	0.00295624	0.00294412	0.00294009	0.00295219	0.00297243	0.00300906	0.0030624	0.00313293	0.00320859		120.846	120.848	120.848	120.847	120.844	120.84	120.833	120.825	120.815		242.079	242.082	242.083	242.08	242.075	242.066	242.053	242.036	242.018		727
													539.5	16991.2	0.5395	31494.3	120.982	1.49485	0.00295523	0.00294312	0.00293909	0.00295119	0.00297143	0.00300805	0.00306138	0.0031319	0.00320754		120.624	120.626	120.626	120.625	120.622	120.618	120.611	120.603	120.594												728
													540	16999.3	0.54	31480.3	120.928	1.49482	0.00295423	0.00294212	0.00293809	0.00295019	0.00297043	0.00300704	0.00306036	0.00313087	0.0032065		120.571	120.572	120.573	120.571	120.569	120.564	120.558	120.549	120.54		241.195	241.198	241.199	241.196	241.191	241.182	241.169	241.152	241.134		729
													540.5	16898.1	0.5405	31263.9	120.097	1.49479	0.00295324	0.00294113	0.00293709	0.0029492	0.00296943	0.00300603	0.00305935	0.00312984	0.00320546		119.742	119.743	119.744	119.742	119.74	119.736	119.729	119.721	119.712												730
													541	16957.5	0.541	31344.7	120.407	1.49476	0.00295224	0.00294013	0.0029361	0.0029482	0.00296843	0.00300503	0.00305833	0.00312882	0.00320443		120.052	120.053	120.054	120.052	120.05	120.045	120.039	120.03	120.021		239.794	239.796	239.797	239.794	239.79	239.781	239.768	239.751	239.733		731
													541.5	16916.9	0.5415	31240.8	120.008	1.49474	0.00295125	0.00293914	0.00293512	0.00294721	0.00296744	0.00300403	0.00305733	0.0031278	0.00320339		119.654	119.655	119.656	119.654	119.652	119.648	119.641	119.633	119.624												732
													542	16960.4	0.542	31292.3	120.206	1.49471	0.00295026	0.00293816	0.00293413	0.00294623	0.00296645	0.00300303	0.00305632	0.00312679	0.00320236		119.851	119.852	119.853	119.851	119.849	119.845	119.838	119.83	119.821		239.505	239.508	239.509	239.506	239.501	239.492	239.479	239.462	239.444		733
													542.5	16898.9	0.5425	31150	119.659	1.49468	0.00294928	0.00293718	0.00293315	0.00294524	0.00296546	0.00300204	0.00305532	0.00312577	0.00320134		119.306	119.308	119.308	119.307	119.304	119.3	119.294	119.285	119.276												734
													543	16924.7	0.543	31168.9	119.732	1.49465	0.0029483	0.0029362	0.00293217	0.00294426	0.00296447	0.00300105	0.00305432	0.00312476	0.00320032		119.379	119.38	119.381	119.379	119.377	119.372	119.366	119.358	119.348		238.685	238.688	238.689	238.686	238.681	238.672	238.66	238.643	238.625		735
													543.5	16826.3	0.5435	30959.2	118.926	1.49463	0.00294732	0.00293522	0.00293119	0.00294328	0.00296349	0.00300006	0.00305332	0.00312375	0.0031993		118.576	118.577	118.578	118.576	118.574	118.569	118.563	118.555	118.546												736
													544	16907	0.544	31079	119.387	1.4946	0.00294634	0.00293425	0.00293022	0.00294231	0.00296252	0.00299908	0.00305233	0.00312275	0.00319828		119.035	119.036	119.037	119.035	119.033	119.029	119.022	119.014	119.005		237.611	237.613	237.614	237.612	237.607	237.598	237.585	237.569	237.551		737
													544.5	16897.3	0.5445	31032.8	119.209	1.49457	0.00294537	0.00293328	0.00292925	0.00294134	0.00296154	0.0029981	0.00305134	0.00312175	0.00319727		118.858	118.859	118.86	118.858	118.856	118.851	118.845	118.837	118.828												738
													545	16865	0.545	30945	118.871	1.49455	0.0029444	0.00293231	0.00292829	0.00294037	0.00296057	0.00299712	0.00305036	0.00312075	0.00319626		118.521	118.523	118.523	118.522	118.52	118.515	118.509	118.501	118.492		237.379	237.382	237.383	237.38	237.375	237.367	237.354	237.337	237.319		739
													545.5	16729.7	0.5455	30668.6	117.81	1.49452	0.00294344	0.00293135	0.00292732	0.0029394	0.0029596	0.00299615	0.00304937	0.00311976	0.00319525		117.463	117.464	117.465	117.463	117.461	117.457	117.451	117.442	117.433												740
													546	16818.8	0.546	30803.7	118.329	1.49449	0.00294247	0.00293039	0.00292636	0.00293844	0.00295863	0.00299517	0.00304839	0.00311877	0.00319425		117.981	117.982	117.982	117.981	117.979	117.974	117.968	117.96	117.951		235.444	235.446	235.447	235.444	235.44	235.431	235.419	235.402	235.384		741
													546.5	16697.5	0.5465	30553.5	117.368	1.49447	0.00294151	0.00292943	0.0029254	0.00293748	0.00295767	0.00299421	0.00304742	0.00311778	0.00319325		117.023	117.024	117.025	117.023	117.021	117.017	117.01	117.002	116.993												742
													547	16677.7	0.547	30489.4	117.121	1.49444	0.00294056	0.00292847	0.00292445	0.00293653	0.00295671	0.00299324	0.00304644	0.00311679	0.00319225		116.777	116.778	116.779	116.777	116.775	116.771	116.765	116.756	116.748		233.8	233.803	233.803	233.801	233.796	233.787	233.775	233.758	233.741		743
													547.5	16637.6	0.5475	30388.3	116.733	1.49441	0.0029396	0.00292752	0.0029235	0.00293557	0.00295576	0.00299228	0.00304547	0.00311581	0.00319126		116.39	116.392	116.392	116.391	116.388	116.384	116.378	116.37	116.361												744
													548	16633.8	0.548	30353.6	116.6	1.49439	0.00293865	0.00292657	0.00292255	0.00293462	0.0029548	0.00299132	0.0030445	0.00311483	0.00319027		116.257	116.259	116.259	116.258	116.255	116.251	116.245	116.237	116.228		232.647	232.65	232.651	232.648	232.644	232.635	232.623	232.606	232.589		745
													548.5	16644.2	0.5485	30345	116.567	1.49436	0.0029377	0.00292562	0.0029216	0.00293367	0.00295385	0.00299036	0.00304354	0.00311386	0.00318928		116.224	116.226	116.226	116.225	116.222	116.218	116.212	116.204	116.195												746
													549	16633.1	0.549	30297.2	116.383	1.49434	0.00293676	0.00292468	0.00292066	0.00293273	0.0029529	0.00298941	0.00304258	0.00311288	0.0031883		116.041	116.043	116.043	116.042	116.039	116.035	116.029	116.021	116.012		232.266	232.268	232.269	232.267	232.262	232.253	232.241	232.225	232.207		747
													549.5	16620.7	0.5495	30247	116.191	1.49431	0.00293582	0.00292374	0.00291972	0.00293179	0.00295196	0.00298846	0.00304162	0.00311191	0.00318731		115.849	115.851	115.851	115.85	115.848	115.843	115.837	115.829	115.82												748
													550	16558.6	0.55	30106.5	115.651	1.49428	0.00293488	0.0029228	0.00291878	0.00293085	0.00295102	0.00298751	0.00304066	0.00311095	0.00318634		115.311	115.313	115.313	115.312	115.309	115.305	115.299	115.291	115.282		231.161	231.164	231.164	231.162	231.157	231.149	231.136	231.12	231.102		749
													550.5	16477	0.5505	29930.9	114.976	1.49426	0.00293394	0.00292187	0.00291785	0.00292991	0.00295008	0.00298656	0.00303971	0.00310998	0.00318536		114.639	114.64	114.641	114.639	114.637	114.633	114.627	114.619	114.61												750
													551	16461.3	0.551	29875.4	114.763	1.49423	0.00293301	0.00292094	0.00291692	0.00292898	0.00294914	0.00298562	0.00303876	0.00310902	0.00318439		114.426	114.428	114.428	114.427	114.424	114.42	114.414	114.406	114.397		229.065	229.068	229.069	229.066	229.061	229.053	229.041	229.025	229.007
													551.5	16454.5	0.5515	29835.9	114.611	1.49421	0.00293207	0.00292001	0.00291599	0.00292805	0.00294821	0.00298468	0.00303781	0.00310806	0.00318342		114.275	114.277	114.277	114.276	114.273	114.269	114.263	114.255	114.246
													552	16382.9	0.552	29679.1	114.009	1.49418	0.00293115	0.00291908	0.00291507	0.00292712	0.00294728	0.00298375	0.00303686	0.00310711	0.00318245		113.675	113.676	113.676	113.675	113.673	113.669	113.663	113.655	113.646		227.95	227.953	227.954	227.951	227.946	227.938	227.926	227.91	227.892
													552.5	16422.1	0.5525	29723.2	114.178	1.49416	0.00293022	0.00291816	0.00291414	0.0029262	0.00294635	0.00298281	0.00303592	0.00310616	0.00318149		113.844	113.845	113.845	113.844	113.842	113.838	113.832	113.823	113.815
													553	16320.5	0.553	29512.7	113.37	1.49413	0.0029293	0.00291724	0.00291322	0.00292528	0.00294542	0.00298188	0.00303498	0.00310521	0.00318053		113.037	113.039	113.039	113.038	113.036	113.031	113.025	113.017	113.009		226.881	226.884	226.885	226.882	226.877	226.869	226.857	226.841	226.824
													553.5	16354	0.5535	29546.6	113.5	1.4941	0.00292838	0.00291632	0.00291231	0.00292436	0.0029445	0.00298096	0.00303405	0.00310426	0.00317957		113.167	113.169	113.169	113.168	113.166	113.161	113.155	113.147	113.139
													554	16300.5	0.554	29423.2	113.026	1.49408	0.00292746	0.00291541	0.00291139	0.00292344	0.00294358	0.00298003	0.00303312	0.00310332	0.00317861		112.695	112.696	112.697	112.696	112.693	112.689	112.683	112.675	112.667		225.862	225.865	225.866	225.863	225.859	225.851	225.838	225.823	225.806
													554.5	16271.5	0.5545	29344.5	112.723	1.49405	0.00292655	0.00291449	0.00291048	0.00292253	0.00294267	0.00297911	0.00303219	0.00310237	0.00317766		112.393	112.395	112.395	112.394	112.392	112.388	112.382	112.374	112.365
													555	16226.7	0.555	29237.3	112.312	1.49403	0.00292564	0.00291358	0.00290957	0.00292162	0.00294175	0.00297819	0.00303126	0.00310144	0.00317671		111.983	111.984	111.985	111.984	111.981	111.977	111.971	111.963	111.955		224.377	224.379	224.38	224.377	224.373	224.365	224.353	224.337	224.32
													555.5	16162.3	0.5555	29095	111.765	1.494	0.00292473	0.00291268	0.00290867	0.00292071	0.00294084	0.00297727	0.00303033	0.0031005	0.00317577		111.438	111.44	111.44	111.439	111.437	111.432	111.427	111.419	111.41
													556	16180.1	0.556	29101	111.788	1.49398	0.00292382	0.00291177	0.00290776	0.0029198	0.00293993	0.00297636	0.00302941	0.00309957	0.00317482		111.461	111.463	111.463	111.462	111.459	111.455	111.449	111.442	111.433		222.9	222.902	222.903	222.9	222.896	222.888	222.876	222.86	222.843
													556.5	16163.1	0.5565	29044.3	111.57	1.49395	0.00292292	0.00291087	0.00290686	0.0029189	0.00293903	0.00297545	0.00302849	0.00309864	0.00317388		111.244	111.245	111.246	111.245	111.242	111.238	111.232	111.224	111.216
													557	16093.2	0.557	28892.6	110.987	1.49393	0.00292202	0.00290997	0.00290596	0.002918	0.00293813	0.00297454	0.00302758	0.00309771	0.00317294		110.663	110.665	110.665	110.664	110.661	110.657	110.651	110.644	110.635		221.907	221.91	221.911	221.908	221.904	221.896	221.884	221.868	221.851
													557.5	16071.9	0.5575	28828.6	110.742	1.4939	0.00292112	0.00290908	0.00290507	0.00291711	0.00293723	0.00297363	0.00302666	0.00309679	0.00317201		110.418	110.419	110.42	110.419	110.416	110.412	110.406	110.399	110.39
													558	16067.7	0.558	28795.2	110.613	1.49388	0.00292023	0.00290819	0.00290418	0.00291621	0.00293633	0.00297273	0.00302575	0.00309587	0.00317108		110.29	110.292	110.292	110.291	110.289	110.285	110.279	110.271	110.263		220.708	220.711	220.712	220.709	220.705	220.697	220.685	220.67	220.653
													558.5	16014.3	0.5585	28673.8	110.147	1.49385	0.00291934	0.0029073	0.00290329	0.00291532	0.00293543	0.00297183	0.00302484	0.00309495	0.00317015		109.825	109.827	109.827	109.826	109.824	109.82	109.814	109.806	109.798
													559	15960.9	0.559	28552.7	109.682	1.49383	0.00291845	0.00290641	0.0029024	0.00291443	0.00293454	0.00297093	0.00302394	0.00309403	0.00316922		109.362	109.363	109.363	109.362	109.36	109.356	109.35	109.342	109.334		219.187	219.19	219.191	219.188	219.184	219.176	219.164	219.149	219.132
													559.5	15909.5	0.5595	28435.3	109.231	1.4938	0.00291756	0.00290552	0.00290152	0.00291354	0.00293365	0.00297004	0.00302304	0.00309312	0.0031683		108.912	108.914	108.914	108.913	108.91	108.906	108.901	108.893	108.885
													560	15921.2	0.56	28430.7	109.213	1.49378	0.00291668	0.00290464	0.00290063	0.00291266	0.00293277	0.00296915	0.00302214	0.00309221	0.00316738		108.895	108.896	108.897	108.895	108.893	108.889	108.883	108.876	108.867		217.807	217.81	217.811	217.808	217.804	217.796	217.784	217.769	217.752
													560.5	15865.4	0.5605	28305.7	108.733	1.49376	0.00291579	0.00290376	0.00289976	0.00291178	0.00293188	0.00296826	0.00302124	0.0030913	0.00316646		108.416	108.417	108.418	108.417	108.414	108.41	108.405	108.397	108.389
													561	15870.5	0.561	28289.7	108.672	1.49373	0.00291492	0.00290288	0.00289888	0.0029109	0.002931	0.00296737	0.00302034	0.0030904	0.00316554		108.355	108.356	108.357	108.355	108.353	108.349	108.343	108.336	108.328		216.771	216.774	216.774	216.772	216.768	216.76	216.748	216.733	216.717
													561.5	15846.8	0.5615	28222.2	108.412	1.49371	0.00291404	0.00290201	0.002898	0.00291003	0.00293012	0.00296649	0.00301945	0.0030895	0.00316463		108.096	108.098	108.098	108.097	108.095	108.091	108.085	108.077	108.069
													562	15836.6	0.562	28179.1	108.247	1.49368	0.00291317	0.00290114	0.00289713	0.00290915	0.00292925	0.00296561	0.00301856	0.0030886	0.00316372		107.931	107.933	107.933	107.932	107.93	107.926	107.92	107.912	107.904		216.028	216.03	216.031	216.029	216.024	216.016	216.005	215.99	215.973
													562.5	15775.5	0.5625	28045.4	107.733	1.49366	0.00291229	0.00290027	0.00289626	0.00290828	0.00292837	0.00296473	0.00301768	0.0030877	0.00316281		107.419	107.421	107.421	107.42	107.418	107.414	107.408	107.401	107.392
													563	15733.1	0.563	27945.1	107.348	1.49363	0.00291143	0.0028994	0.0028954	0.00290741	0.0029275	0.00296385	0.00301679	0.00308681	0.00316191		107.035	107.037	107.037	107.036	107.034	107.03	107.024	107.016	107.008		214.455	214.457	214.458	214.456	214.451	214.443	214.432	214.417	214.401
													563.5	15657.8	0.5635	27786.7	106.739	1.49361	0.00291056	0.00289854	0.00289453	0.00290655	0.00292663	0.00296298	0.00301591	0.00308591	0.003161		106.429	106.43	106.43	106.429	106.427	106.423	106.417	106.41	106.402
													564	15613.5	0.564	27683.6	106.343	1.49359	0.0029097	0.00289767	0.00289367	0.00290569	0.00292577	0.00296211	0.00301503	0.00308503	0.0031601		106.034	106.035	106.036	106.034	106.032	106.028	106.023	106.015	106.007		212.463	212.465	212.466	212.463	212.459	212.451	212.44	212.425	212.409
													564.5	15552	0.5645	27550	105.83	1.49356	0.00290884	0.00289682	0.00289282	0.00290483	0.0029249	0.00296124	0.00301416	0.00308414	0.00315921		105.522	105.524	105.524	105.523	105.521	105.517	105.511	105.504	105.496
													565	15540.7	0.565	27505.7	105.66	1.49354	0.00290798	0.00289596	0.00289196	0.00290397	0.00292404	0.00296037	0.00301328	0.00308326	0.00315831		105.353	105.354	105.355	105.353	105.351	105.347	105.342	105.334	105.326		210.875	210.878	210.879	210.876	210.872	210.864	210.853	210.838	210.822
													565.5	15496.9	0.5655	27403.9	105.269	1.49351	0.00290712	0.0028951	0.00289111	0.00290311	0.00292318	0.00295951	0.00301241	0.00308237	0.00315742		104.963	104.964	104.964	104.963	104.961	104.957	104.952	104.944	104.936
													566	15527.8	0.566	27434.3	105.386	1.49349	0.00290627	0.00289425	0.00289025	0.00290226	0.00292233	0.00295865	0.00301154	0.0030815	0.00315653		105.08	105.081	105.081	105.08	105.078	105.074	105.068	105.061	105.053		210.042	210.045	210.046	210.043	210.039	210.031	210.02	210.005	209.99
													566.5	15429	0.5665	27235.6	104.623	1.49347	0.00290542	0.0028934	0.00288941	0.00290141	0.00292148	0.00295779	0.00301068	0.00308062	0.00315565		104.319	104.32	104.32	104.319	104.317	104.313	104.308	104.3	104.292
													567	15418.6	0.567	27193.2	104.46	1.49344	0.00290457	0.00289256	0.00288856	0.00290056	0.00292063	0.00295693	0.00300981	0.00307975	0.00315476		104.156	104.158	104.158	104.157	104.155	104.151	104.145	104.138	104.13		208.475	208.477	208.478	208.476	208.471	208.464	208.453	208.438	208.423
													567.5	15353.8	0.5675	27055.2	103.929	1.49342	0.00290372	0.00289171	0.00288772	0.00289972	0.00291978	0.00295608	0.00300895	0.00307887	0.00315388		103.628	103.629	103.629	103.628	103.626	103.622	103.617	103.609	103.602
													568	15322.7	0.568	26976.6	103.628	1.4934	0.00290288	0.00289087	0.00288687	0.00289887	0.00291893	0.00295523	0.00300809	0.00307801	0.003153		103.327	103.328	103.328	103.327	103.325	103.321	103.316	103.309	103.301		206.954	206.957	206.958	206.955	206.951	206.943	206.932	206.918	206.902
													568.5	15262.5	0.5685	26847	103.129	1.49337	0.00290204	0.00289003	0.00288604	0.00289803	0.00291809	0.00295438	0.00300724	0.00307714	0.00315212		102.83	102.831	102.832	102.831	102.829	102.825	102.819	102.812	102.804
													569	15233.7	0.569	26772.7	102.844	1.49335	0.0029012	0.0028892	0.0028852	0.00289719	0.00291725	0.00295353	0.00300638	0.00307628	0.00315125		102.546	102.547	102.547	102.546	102.544	102.54	102.535	102.528	102.52		205.376	205.378	205.379	205.377	205.373	205.365	205.354	205.34	205.324
													569.5	15195.7	0.5695	26682.6	102.498	1.49333	0.00290036	0.00288836	0.00288437	0.00289636	0.00291641	0.00295269	0.00300553	0.00307542	0.00315038		102.201	102.202	102.202	102.201	102.199	102.195	102.19	102.183	102.175
													570	15114.1	0.57	26516	101.858	1.4933	0.00289953	0.00288753	0.00288353	0.00289553	0.00291557	0.00295185	0.00300468	0.00307456	0.00314951		101.563	101.564	101.564	101.563	101.561	101.557	101.552	101.545	101.537		203.763	203.766	203.767	203.764	203.76	203.753	203.742	203.728	203.712
													570.5	15052.2	0.5705	26384.2	101.352	1.49328	0.0028987	0.0028867	0.00288271	0.00289469	0.00291474	0.00295101	0.00300384	0.0030737	0.00314864		101.058	101.059	101.06	101.058	101.056	101.053	101.047	101.04	101.033
													571	15012.4	0.571	26291.4	100.995	1.49326	0.00289787	0.00288587	0.00288188	0.00289387	0.00291391	0.00295017	0.00300299	0.00307285	0.00314778		100.703	100.704	100.704	100.703	100.701	100.697	100.692	100.685	100.678		201.761	201.763	201.764	201.762	201.758	201.75	201.74	201.725	201.71
													571.5	14982.4	0.5715	26215.9	100.706	1.49323	0.00289704	0.00288505	0.00288105	0.00289304	0.00291308	0.00294934	0.00300215	0.003072	0.00314692		100.414	100.415	100.415	100.414	100.412	100.409	100.403	100.396	100.389
													572	14925	0.572	26092.6	100.232	1.49321	0.00289622	0.00288422	0.00288023	0.00289222	0.00291225	0.00294851	0.00300131	0.00307115	0.00314606		99.9416	99.9428	99.9432	99.942	99.94	99.9363	99.931	99.924	99.9165		200.355	200.358	200.359	200.356	200.352	200.345	200.334	200.32	200.305
													572.5	14847.1	0.5725	25933.8	99.6216	1.49319	0.0028954	0.0028834	0.00287941	0.0028914	0.00291143	0.00294768	0.00300048	0.0030703	0.0031452		99.3331	99.3343	99.3347	99.3335	99.3315	99.3279	99.3226	99.3157	99.3082
													573	14771.1	0.573	25778.5	99.0253	1.49317	0.00289458	0.00288259	0.0028786	0.00289058	0.00291061	0.00294685	0.00299964	0.00306946	0.00314435		98.7386	98.7398	98.7402	98.739	98.737	98.7335	98.7282	98.7213	98.7139		198.072	198.074	198.075	198.073	198.069	198.061	198.051	198.037	198.022
													573.5	14733.4	0.5735	25690.3	98.6862	1.49314	0.00289376	0.00288177	0.00287778	0.00288976	0.00290979	0.00294603	0.00299881	0.00306862	0.0031435		98.4006	98.4018	98.4022	98.401	98.399	98.3955	98.3903	98.3834	98.376
													574	14686.5	0.574	25586.3	98.2868	1.49312	0.00289294	0.00288096	0.00287697	0.00288895	0.00290897	0.0029452	0.00299798	0.00306778	0.00314265		98.0025	98.0036	98.004	98.0029	98.0009	97.9973	97.9921	97.9853	97.9779		196.403	196.405	196.406	196.404	196.4	196.393	196.382	196.369	196.354
													574.5	14640.5	0.5745	25483.9	97.8935	1.4931	0.00289213	0.00288015	0.00287616	0.00288813	0.00290815	0.00294438	0.00299715	0.00306694	0.0031418		97.6104	97.6116	97.612	97.6108	97.6088	97.6053	97.6001	97.5933	97.586
													575	14646.8	0.575	25472.7	97.8506	1.49307	0.00289132	0.00287934	0.00287535	0.00288732	0.00290734	0.00294357	0.00299633	0.00306611	0.00314096		97.5677	97.5689	97.5693	97.5681	97.5661	97.5626	97.5574	97.5506	97.5433		195.178	195.18	195.181	195.179	195.175	195.168	195.158	195.144	195.129
													575.5	14614.5	0.5755	25394.5	97.55	1.49305	0.00289051	0.00287853	0.00287454	0.00288652	0.00290653	0.00294275	0.00299551	0.00306528	0.00314012		97.268	97.2692	97.2695	97.2684	97.2664	97.2629	97.2577	97.2509	97.2436
													576	14534.3	0.576	25233.2	96.9305	1.49303	0.00288971	0.00287773	0.00287374	0.00288571	0.00290572	0.00294194	0.00299469	0.00306445	0.00313928		96.6504	96.6516	96.6519	96.6508	96.6488	96.6453	96.6402	96.6335	96.6262		193.918	193.921	193.921	193.919	193.915	193.908	193.898	193.884	193.87
													576.5	14471.7	0.5765	25102.6	96.4288	1.49301	0.0028889	0.00287693	0.00287294	0.00288491	0.00290492	0.00294113	0.00299387	0.00306362	0.00313844		96.1503	96.1514	96.1518	96.1506	96.1487	96.1452	96.1401	96.1334	96.1262
													577	14412.3	0.577	24978	95.9502	1.49299	0.0028881	0.00287613	0.00287214	0.00288411	0.00290411	0.00294032	0.00299305	0.00306279	0.0031376		95.6731	95.6742	95.6746	95.6735	95.6716	95.6681	95.663	95.6563	95.6492		191.823	191.826	191.826	191.824	191.82	191.813	191.803	191.79	191.775
													577.5	14370.1	0.5775	24883.3	95.5863	1.49296	0.0028873	0.00287533	0.00287134	0.00288331	0.00290331	0.00293951	0.00299224	0.00306197	0.00313677		95.3103	95.3114	95.3118	95.3106	95.3087	95.3053	95.3002	95.2936	95.2864
													578	14301	0.578	24742.2	95.0444	1.49294	0.00288651	0.00287453	0.00287055	0.00288251	0.00290251	0.00293871	0.00299143	0.00306115	0.00313594		94.77	94.7712	94.7715	94.7704	94.7685	94.7651	94.7601	94.7534	94.7463		190.08	190.083	190.083	190.081	190.077	190.07	190.06	190.047	190.033
													578.5	14255.1	0.5785	24641.5	94.6577	1.49292	0.00288571	0.00287374	0.00286976	0.00288172	0.00290172	0.00293791	0.00299062	0.00306033	0.00313511		94.3845	94.3856	94.386	94.3849	94.383	94.3796	94.3746	94.368	94.3609
													579	14159.9	0.579	24455.7	93.9439	1.4929	0.00288492	0.00287295	0.00286897	0.00288093	0.00290092	0.00293711	0.00298981	0.00305952	0.00313429		93.6728	93.674	93.6743	93.6732	93.6713	93.6679	93.663	93.6564	93.6494		188.057	188.06	188.06	188.058	188.054	188.048	188.038	188.024	188.01
													579.5	14090.2	0.5795	24314.4	93.4008	1.49287	0.00288413	0.00287216	0.00286818	0.00288014	0.00290013	0.00293631	0.00298901	0.0030587	0.00313347		93.1314	93.1325	93.1329	93.1318	93.1299	93.1266	93.1216	93.1151	93.1081
													580	14089	0.58	24291.3	93.3122	1.49285	0.00288334	0.00287138	0.00286739	0.00287935	0.00289934	0.00293552	0.00298821	0.00305789	0.00313264		93.0432	93.0443	93.0447	93.0436	93.0417	93.0383	93.0334	93.0269	93.0199		186.175	186.177	186.178	186.175	186.172	186.165	186.155	186.142	186.128
													580.5	14051	0.5805	24205	92.9809	1.49283	0.00288256	0.00287059	0.00286661	0.00287857	0.00289855	0.00293472	0.00298741	0.00305708	0.00313183		92.7129	92.714	92.7143	92.7132	92.7114	92.708	92.7031	92.6966	92.6897
													581	13959.8	0.581	24027.2	92.2977	1.49281	0.00288177	0.00286981	0.00286583	0.00287778	0.00289777	0.00293393	0.00298661	0.00305628	0.00313101		92.0318	92.0329	92.0332	92.0321	92.0303	92.027	92.0221	92.0157	92.0088		184.745	184.747	184.748	184.745	184.742	184.735	184.725	184.712	184.698
													581.5	13831.5	0.5815	23785.9	91.3709	1.49279	0.00288099	0.00286903	0.00286505	0.002877	0.00289698	0.00293315	0.00298582	0.00305547	0.0031302		91.1077	91.1088	91.1091	91.108	91.1062	91.1029	91.0981	91.0917	91.0849
													582	13800.6	0.582	23712.4	91.0883	1.49277	0.00288021	0.00286825	0.00286427	0.00287622	0.0028962	0.00293236	0.00298502	0.00305467	0.00312938		90.826	90.8271	90.8274	90.8264	90.8245	90.8212	90.8164	90.8101	90.8033		181.934	181.936	181.937	181.934	181.931	181.924	181.915	181.902	181.888
													582.5	13754.1	0.5825	23612.2	90.7037	1.49274	0.00287944	0.00286748	0.0028635	0.00287545	0.00289542	0.00293158	0.00298423	0.00305387	0.00312857		90.4426	90.4436	90.444	90.4429	90.4411	90.4378	90.433	90.4267	90.42
													583	13662.9	0.583	23435.5	90.0248	1.49272	0.00287866	0.0028667	0.00286272	0.00287467	0.00289465	0.00293079	0.00298344	0.00305307	0.00312777		89.7657	89.7667	89.7671	89.766	89.7642	89.761	89.7562	89.75	89.7432		180.208	180.21	180.211	180.209	180.205	180.199	180.189	180.177	180.163
													583.5	13604.8	0.5835	23315.9	89.5654	1.4927	0.00287789	0.00286593	0.00286195	0.0028739	0.00289387	0.00293001	0.00298266	0.00305228	0.00312696		89.3076	89.3087	89.3091	89.308	89.3062	89.303	89.2982	89.292	89.2853
													584	13527.8	0.584	23164	88.9819	1.49268	0.00287712	0.00286516	0.00286119	0.00287313	0.0028931	0.00292924	0.00298187	0.00305148	0.00312616		88.7259	88.727	88.7273	88.7263	88.7245	88.7213	88.7166	88.7104	88.7037		178.034	178.036	178.036	178.034	178.031	178.024	178.015	178.002	177.989
													584.5	13430.5	0.5845	22977.8	88.2666	1.49266	0.00287635	0.0028644	0.00286042	0.00287236	0.00289233	0.00292846	0.00298109	0.00305069	0.00312536		88.0127	88.0138	88.0142	88.0131	88.0113	88.0082	88.0035	87.9974	87.9908
													585	13352.3	0.585	22824.4	87.6774	1.49264	0.00287558	0.00286363	0.00285966	0.0028716	0.00289156	0.00292769	0.00298031	0.0030499	0.00312456		87.4253	87.4263	87.4267	87.4256	87.4239	87.4207	87.4161	87.41	87.4034		175.438	175.44	175.441	175.439	175.435	175.429	175.42	175.407	175.394
													585.5	13318.7	0.5855	22747.6	87.3825	1.49261	0.00287482	0.00286287	0.00285889	0.00287083	0.00289079	0.00292692	0.00297953	0.00304912	0.00312376		87.1313	87.1323	87.1326	87.1316	87.1299	87.1267	87.1221	87.116	87.1095
													586	13266.4	0.586	22638.9	86.9647	1.49259	0.00287406	0.00286211	0.00285813	0.00287007	0.00289003	0.00292615	0.00297876	0.00304833	0.00312297		86.7147	86.7158	86.7161	86.7151	86.7133	86.7102	86.7056	86.6996	86.6931		173.846	173.848	173.849	173.847	173.843	173.837	173.828	173.816	173.803
													586.5	13200.8	0.5865	22507.7	86.4607	1.49257	0.0028733	0.00286135	0.00285738	0.00286931	0.00288927	0.00292538	0.00297798	0.00304755	0.00312218		86.2123	86.2133	86.2137	86.2126	86.2109	86.2078	86.2033	86.1972	86.1908
													587	13140.1	0.587	22385.3	85.9904	1.49255	0.00287254	0.0028606	0.00285662	0.00286856	0.00288851	0.00292462	0.00297721	0.00304677	0.00312139		85.7434	85.7444	85.7448	85.7437	85.742	85.7389	85.7344	85.7284	85.722		171.956	171.958	171.958	171.956	171.953	171.947	171.938	171.926	171.913
													587.5	13066.1	0.5875	22240.2	85.4331	1.49253	0.00287178	0.00285984	0.00285587	0.0028678	0.00288775	0.00292385	0.00297644	0.00304599	0.0031206		85.1878	85.1888	85.1892	85.1881	85.1864	85.1833	85.1789	85.1729	85.1665
													588	12979.8	0.588	22074.5	84.7968	1.49251	0.00287103	0.00285909	0.00285511	0.00286705	0.00288699	0.00292309	0.00297567	0.00304521	0.00311981		84.5533	84.5543	84.5547	84.5537	84.552	84.5489	84.5444	84.5385	84.5322		169.741	169.743	169.744	169.742	169.738	169.732	169.723	169.711	169.699
													588.5	12901.7	0.5885	21923.1	84.2151	1.49249	0.00287028	0.00285834	0.00285436	0.0028663	0.00288624	0.00292234	0.00297491	0.00304444	0.00311903		83.9734	83.9744	83.9747	83.9737	83.972	83.969	83.9645	83.9587	83.9524
													589	12832.1	0.589	21786.3	83.6897	1.49247	0.00286953	0.00285759	0.00285362	0.00286555	0.00288549	0.00292158	0.00297415	0.00304367	0.00311825		83.4495	83.4505	83.4509	83.4499	83.4482	83.4452	83.4408	83.4349	83.4287		167.423	167.425	167.426	167.424	167.42	167.414	167.405	167.394	167.381
													589.5	12733.6	0.5895	21600.7	82.9768	1.49245	0.00286878	0.00285684	0.00285287	0.0028648	0.00288474	0.00292082	0.00297338	0.0030429	0.00311747		82.7387	82.7397	82.7401	82.7391	82.7374	82.7344	82.7301	82.7243	82.7181
													590	12683	0.59	21496.6	82.5768	1.49243	0.00286804	0.0028561	0.00285213	0.00286405	0.00288399	0.00292007	0.00297263	0.00304213	0.00311669		82.3399	82.3409	82.3412	82.3403	82.3386	82.3356	82.3313	82.3255	82.3194		165.079	165.081	165.081	165.079	165.076	165.07	165.061	165.05	165.037
													590.5	12649.7	0.5905	21422	82.29	1.4924	0.00286729	0.00285536	0.00285139	0.00286331	0.00288325	0.00291932	0.00297187	0.00304136	0.00311592		82.054	82.055	82.0553	82.0544	82.0527	82.0498	82.0454	82.0397	82.0336
													591	12567.5	0.591	21264.8	81.6863	1.49238	0.00286655	0.00285462	0.00285065	0.00286257	0.0028825	0.00291857	0.00297111	0.0030406	0.00311514		81.4521	81.4531	81.4534	81.4525	81.4508	81.4479	81.4436	81.4379	81.4318		163.506	163.508	163.509	163.507	163.504	163.498	163.489	163.478	163.465
													591.5	12498.4	0.5915	21130	81.1686	1.49236	0.00286581	0.00285388	0.00284991	0.00286183	0.00288176	0.00291783	0.00297036	0.00303984	0.00311437		80.936	80.937	80.9373	80.9363	80.9347	80.9318	80.9275	80.9219	80.9158
													592	12403.8	0.592	20952.4	80.4864	1.49234	0.00286507	0.00285314	0.00284917	0.00286109	0.00288102	0.00291708	0.00296961	0.00303908	0.0031136		80.2558	80.2567	80.257	80.2561	80.2545	80.2516	80.2473	80.2418	80.2358		161.192	161.194	161.194	161.192	161.189	161.183	161.175	161.164	161.152
													592.5	12272.4	0.5925	20712.9	79.5664	1.49232	0.00286434	0.00285241	0.00284844	0.00286036	0.00288028	0.00291634	0.00296886	0.00303832	0.00311284		79.3384	79.3394	79.3397	79.3388	79.3372	79.3343	79.3301	79.3246	79.3187
													593	12160.5	0.593	20506.7	78.7741	1.4923	0.0028636	0.00285168	0.00284771	0.00285962	0.00287955	0.0029156	0.00296811	0.00303757	0.00311207		78.5485	78.5495	78.5498	78.5488	78.5473	78.5444	78.5403	78.5348	78.529		157.887	157.889	157.889	157.888	157.884	157.879	157.87	157.859	157.848
													593.5	12078.7	0.5935	20351.7	78.1786	1.49228	0.00286287	0.00285095	0.00284698	0.00285889	0.00287881	0.00291486	0.00296737	0.00303681	0.00311131		77.9548	77.9557	77.9561	77.9551	77.9536	77.9507	77.9466	77.9412	77.9354
													594	11998	0.594	20198.6	77.5908	1.49226	0.00286214	0.00285022	0.00284625	0.00285816	0.00287808	0.00291413	0.00296663	0.00303606	0.00311055		77.3687	77.3696	77.3699	77.369	77.3674	77.3646	77.3606	77.3552	77.3494		155.323	155.325	155.326	155.324	155.321	155.315	155.307	155.296	155.285
													594.5	11935.2	0.5945	20076	77.1198	1.49224	0.00286141	0.00284949	0.00284552	0.00285744	0.00287735	0.00291339	0.00296588	0.00303531	0.00310979		76.8991	76.9001	76.9004	76.8995	76.8979	76.8951	76.8911	76.8857	76.88
													595	11892.8	0.595	19987.9	76.781	1.49222	0.00286069	0.00284877	0.0028448	0.00285671	0.00287662	0.00291266	0.00296515	0.00303456	0.00310903		76.5614	76.5623	76.5626	76.5617	76.5602	76.5574	76.5534	76.548	76.5423		153.461	153.462	153.463	153.461	153.458	153.453	153.444	153.434	153.422
													595.5	11830.5	0.5955	19866.5	76.3147	1.4922	0.00285996	0.00284804	0.00284408	0.00285599	0.0028759	0.00291193	0.00296441	0.00303382	0.00310828		76.0965	76.0974	76.0977	76.0968	76.0953	76.0925	76.0885	76.0832	76.0775
													596	11748.5	0.596	19712.3	75.7226	1.49218	0.00285924	0.00284732	0.00284336	0.00285527	0.00287517	0.0029112	0.00296367	0.00303308	0.00310753		75.5061	75.507	75.5073	75.5064	75.5049	75.5021	75.4981	75.4929	75.4873		151.603	151.604	151.605	151.603	151.6	151.595	151.587	151.576	151.565
													596.5	11661.8	0.5965	19550.3	75.1004	1.49216	0.00285852	0.00284661	0.00284264	0.00285455	0.00287445	0.00291047	0.00296294	0.00303233	0.00310678		74.8857	74.8866	74.8869	74.886	74.8845	74.8818	74.8778	74.8726	74.867
													597	11633.1	0.597	19486	74.8531	1.49214	0.0028578	0.00284589	0.00284192	0.00285383	0.00287373	0.00290975	0.00296221	0.00303159	0.00310603		74.6392	74.6401	74.6404	74.6395	74.638	74.6353	74.6314	74.6262	74.6206		149.525	149.527	149.527	149.525	149.522	149.517	149.509	149.499	149.488
													597.5	11604.1	0.5975	19421	74.6036	1.49212	0.00285709	0.00284517	0.00284121	0.00285311	0.00287301	0.00290903	0.00296148	0.00303086	0.00310528		74.3905	74.3913	74.3916	74.3908	74.3893	74.3866	74.3827	74.3775	74.3719
													598	11542.9	0.598	19302.5	74.1482	1.4921	0.00285637	0.00284446	0.0028405	0.0028524	0.0028723	0.0029083	0.00296075	0.00303012	0.00310454		73.9364	73.9372	73.9375	73.9367	73.9352	73.9325	73.9286	73.9235	73.918		148.327	148.329	148.329	148.327	148.324	148.319	148.311	148.301	148.29
													598.5	11479.7	0.5985	19180.8	73.681	1.49208	0.00285566	0.00284375	0.00283979	0.00285169	0.00287158	0.00290759	0.00296003	0.00302939	0.00310379		73.4706	73.4715	73.4718	73.4709	73.4694	73.4668	73.4629	73.4578	73.4523
													599	11429.2	0.599	19080.4	73.2952	1.49206	0.00285495	0.00284304	0.00283908	0.00285098	0.00287087	0.00290687	0.0029593	0.00302865	0.00310305		73.086	73.0868	73.0871	73.0863	73.0848	73.0822	73.0783	73.0732	73.0678		146.557	146.558	146.559	146.557	146.554	146.549	146.541	146.531	146.52
													599.5	11427	0.5995	19061	73.2204	1.49204	0.00285424	0.00284233	0.00283837	0.00285027	0.00287016	0.00290615	0.00295858	0.00302792	0.00310231		73.0115	73.0123	73.0126	73.0118	73.0103	73.0077	73.0038	72.9987	72.9933
													600	11390.9	0.6	18984.9	72.9283	1.49202	0.00285353	0.00284163	0.00283767	0.00284956	0.00286945	0.00290544	0.00295786	0.0030272	0.00310158		72.7202	72.7211	72.7214	72.7205	72.719	72.7164	72.7126	72.7075	72.7021		145.732	145.733	145.734	145.732	145.729	145.724	145.716	145.706	145.695
													600.5	11347.1	0.6005	18896.1	72.5872	1.492	0.00285283	0.00284092	0.00283696	0.00284886	0.00286874	0.00290473	0.00295714	0.00302647	0.00310084		72.3801	72.381	72.3813	72.3804	72.379	72.3764	72.3726	72.3675	72.3621
													601	11305.8	0.601	18811.7	72.2629	1.49198	0.00285212	0.00284022	0.00283626	0.00284815	0.00286804	0.00290402	0.00295643	0.00302575	0.00310011		72.0568	72.0576	72.0579	72.057	72.0556	72.053	72.0492	72.0442	72.0388		144.437	144.439	144.439	144.437	144.435	144.429	144.422	144.412	144.401
													601.5	11233	0.6015	18675	71.738	1.49196	0.00285142	0.00283952	0.00283556	0.00284745	0.00286733	0.00290331	0.00295571	0.00302502	0.00309938		71.5335	71.5343	71.5346	71.5338	71.5323	71.5298	71.526	71.521	71.5157
													602	11140.7	0.602	18506.1	71.0891	1.49194	0.00285072	0.00283882	0.00283486	0.00284675	0.00286663	0.0029026	0.002955	0.0030243	0.00309865		70.8864	70.8873	70.8876	70.8867	70.8853	70.8828	70.879	70.8741	70.8688		142.42	142.422	142.422	142.42	142.418	142.413	142.405	142.395	142.385
													602.5	11026.6	0.6025	18301.4	70.3026	1.49192	0.00285003	0.00283813	0.00283417	0.00284606	0.00286593	0.0029019	0.00295429	0.00302358	0.00309792		70.1022	70.103	70.1033	70.1025	70.1011	70.0986	70.0949	70.09	70.0848
													603	10920.5	0.603	18110.3	69.5687	1.4919	0.00284933	0.00283743	0.00283347	0.00284536	0.00286523	0.0029012	0.00295358	0.00302287	0.0030972		69.3705	69.3713	69.3716	69.3708	69.3694	69.3669	69.3633	69.3584	69.3533		139.473	139.474	139.475	139.473	139.47	139.465	139.458	139.448	139.438
													603.5	10871	0.6035	18013.2	69.1956	1.49188	0.00284863	0.00283674	0.00283278	0.00284467	0.00286454	0.0029005	0.00295288	0.00302215	0.00309647		68.9984	68.9993	68.9995	68.9987	68.9973	68.9949	68.9912	68.9864	68.9813
													604	10831.6	0.604	17933	68.8877	1.49186	0.00284794	0.00283605	0.00283209	0.00284397	0.00286384	0.0028998	0.00295217	0.00302144	0.00309575		68.6915	68.6923	68.6926	68.6918	68.6904	68.6879	68.6843	68.6796	68.6744		137.69	137.692	137.692	137.691	137.688	137.683	137.676	137.666	137.656
													604.5	10775.7	0.6045	17825.8	68.4758	1.49184	0.00284725	0.00283536	0.0028314	0.00284328	0.00286315	0.0028991	0.00295147	0.00302073	0.00309503		68.2809	68.2817	68.2819	68.2811	68.2798	68.2773	68.2737	68.269	68.2639
													605	10662.5	0.605	17623.9	67.7003	1.49182	0.00284656	0.00283467	0.00283071	0.0028426	0.00286246	0.00289841	0.00295077	0.00302002	0.00309431		67.5076	67.5084	67.5087	67.5079	67.5065	67.5041	67.5005	67.4959	67.4908		135.788	135.79	135.791	135.789	135.786	135.781	135.774	135.765	135.755
													605.5	10527.2	0.6055	17385.9	66.7861	1.4918	0.00284588	0.00283399	0.00283003	0.00284191	0.00286177	0.00289771	0.00295007	0.00301931	0.0030936		66.596	66.5968	66.5971	66.5963	66.595	66.5926	66.5891	66.5845	66.5795
													606	10440.2	0.606	17228.1	66.1798	1.49179	0.00284519	0.0028333	0.00282935	0.00284122	0.00286108	0.00289702	0.00294937	0.00301861	0.00309288		65.9915	65.9923	65.9925	65.9918	65.9904	65.9881	65.9846	65.98	65.9751		132.588	132.589	132.59	132.588	132.585	132.581	132.574	132.564	132.555
													606.5	10358.4	0.6065	17079	65.6069	1.49177	0.00284451	0.00283262	0.00282866	0.00284054	0.0028604	0.00289633	0.00294867	0.0030179	0.00309217		65.4203	65.4211	65.4213	65.4206	65.4193	65.4169	65.4135	65.4089	65.4041
													607	10235.4	0.607	16862.3	64.7746	1.49175	0.00284382	0.00283194	0.00282798	0.00283986	0.00285971	0.00289564	0.00294798	0.0030172	0.00309146		64.5904	64.5911	64.5914	64.5906	64.5893	64.587	64.5836	64.5791	64.5743		130.011	130.012	130.013	130.011	130.009	130.004	129.997	129.988	129.978
													607.5	10156.4	0.6075	16718.4	64.2216	1.49173	0.00284314	0.00283126	0.00282731	0.00283918	0.00285903	0.00289496	0.00294729	0.0030165	0.00309075		64.039	64.0398	64.0401	64.0393	64.038	64.0357	64.0324	64.0279	64.0231
													608	10113	0.608	16633.2	63.8944	1.49171	0.00284247	0.00283058	0.00282663	0.0028385	0.00285835	0.00289427	0.0029466	0.0030158	0.00309004		63.7128	63.7136	63.7138	63.7131	63.7118	63.7095	63.7062	63.7018	63.697		127.752	127.753	127.754	127.752	127.75	127.745	127.739	127.73	127.72
													608.5	10016.5	0.6085	16460.9	63.2327	1.49169	0.00284179	0.00282991	0.00282595	0.00283783	0.00285767	0.00289359	0.00294591	0.0030151	0.00308934		63.053	63.0538	63.054	63.0533	63.052	63.0497	63.0464	63.042	63.0373
													609	9942.11	0.609	16325.3	62.7118	1.49167	0.00284111	0.00282924	0.00282528	0.00283715	0.002857	0.00289291	0.00294522	0.00301441	0.00308863		62.5336	62.5344	62.5346	62.5339	62.5326	62.5304	62.5271	62.5228	62.5181		125.587	125.588	125.589	125.587	125.585	125.58	125.574	125.565	125.555
													609.5	9883.56	0.6095	16215.8	62.2913	1.49165	0.00284044	0.00282856	0.00282461	0.00283648	0.00285632	0.00289223	0.00294454	0.00301371	0.00308793		62.1144	62.1151	62.1154	62.1146	62.1134	62.1112	62.1079	62.1036	62.099
													610	9828.31	0.61	16112	61.8924	1.49163	0.00283977	0.00282789	0.00282394	0.00283581	0.00285565	0.00289155	0.00294385	0.00301302	0.00308723		61.7166	61.7173	61.7176	61.7168	61.7156	61.7134	61.7102	61.7059	61.7013		123.831	123.832	123.833	123.831	123.829	123.825	123.818	123.809	123.8
													610.5	9753.12	0.6105	15975.6	61.3685	1.49161	0.0028391	0.00282723	0.00282327	0.00283514	0.00285498	0.00289088	0.00294317	0.00301233	0.00308653		61.1943	61.195	61.1953	61.1945	61.1933	61.1911	61.1879	61.1837	61.1791
													611	9706.33	0.611	15886	61.0242	1.4916	0.00283843	0.00282656	0.00282261	0.00283447	0.00285431	0.0028902	0.00294249	0.00301165	0.00308584		60.8509	60.8517	60.8519	60.8512	60.85	60.8478	60.8446	60.8404	60.8359		122.045	122.047	122.047	122.046	122.043	122.039	122.033	122.024	122.015
													611.5	9623.3	0.6115	15737.2	60.4527	1.49158	0.00283777	0.00282589	0.00282194	0.00283381	0.00285364	0.00288953	0.00294181	0.00301096	0.00308514		60.2811	60.2818	60.2821	60.2813	60.2801	60.278	60.2748	60.2706	60.2662
													612	9512.61	0.612	15543.5	59.7085	1.49156	0.0028371	0.00282523	0.00282128	0.00283314	0.00285297	0.00288886	0.00294113	0.00301027	0.00308445		59.5391	59.5398	59.5401	59.5393	59.5382	59.536	59.5329	59.5288	59.5243		119.82	119.822	119.822	119.821	119.818	119.814	119.808	119.799	119.79
													612.5	9386.24	0.6125	15324.5	58.8672	1.49154	0.00283644	0.00282457	0.00282062	0.00283248	0.00285231	0.00288819	0.00294046	0.00300959	0.00308376		58.7002	58.7009	58.7011	58.7004	58.6993	58.6972	58.6941	58.69	58.6856
													613	9312.47	0.613	15191.6	58.3569	1.49152	0.00283578	0.00282391	0.00281996	0.00283182	0.00285164	0.00288752	0.00293979	0.00300891	0.00308307		58.1914	58.1921	58.1923	58.1916	58.1905	58.1884	58.1853	58.1813	58.177		116.892	116.893	116.893	116.892	116.89	116.886	116.879	116.871	116.863
													613.5	9219.67	0.6135	15028	57.7283	1.4915	0.00283512	0.00282325	0.0028193	0.00283116	0.00285098	0.00288686	0.00293911	0.00300823	0.00308238		57.5646	57.5653	57.5655	57.5648	57.5637	57.5616	57.5586	57.5546	57.5503
													614	9133.41	0.614	14875.3	57.1416	1.49148	0.00283446	0.00282259	0.00281864	0.0028305	0.00285032	0.00288619	0.00293844	0.00300755	0.0030817		56.9796	56.9803	56.9805	56.9798	56.9787	56.9767	56.9737	56.9697	56.9655		114.544	114.546	114.546	114.545	114.542	114.538	114.532	114.524	114.516
													614.5	9044.92	0.6145	14719.2	56.5419	1.49147	0.0028338	0.00282194	0.00281799	0.00282984	0.00284966	0.00288553	0.00293778	0.00300688	0.00308101		56.3817	56.3824	56.3826	56.3819	56.3808	56.3788	56.3758	56.3719	56.3677
													615	8934.24	0.615	14527.2	55.8046	1.49145	0.00283315	0.00282129	0.00281734	0.00282919	0.00284901	0.00288487	0.00293711	0.0030062	0.00308033		55.6465	55.6472	55.6474	55.6468	55.6457	55.6437	55.6407	55.6369	55.6327		112.028	112.03	112.03	112.029	112.026	112.022	112.017	112.009	112
													615.5	8811.76	0.6155	14316.4	54.9949	1.49143	0.00283249	0.00282063	0.00281669	0.00282854	0.00284835	0.00288421	0.00293644	0.00300553	0.00307965		54.8392	54.8398	54.84	54.8394	54.8383	54.8363	54.8334	54.8296	54.8256
													616	8736.27	0.616	14182.3	54.4795	1.49141	0.00283184	0.00281998	0.00281604	0.00282789	0.0028477	0.00288355	0.00293578	0.00300486	0.00307897		54.3252	54.3259	54.3261	54.3254	54.3243	54.3224	54.3195	54.3158	54.3117		109.164	109.166	109.166	109.165	109.163	109.159	109.153	109.145	109.137
													616.5	8665.57	0.6165	14056.1	53.9948	1.49139	0.00283119	0.00281933	0.00281539	0.00282724	0.00284705	0.0028829	0.00293512	0.00300419	0.00307829		53.8419	53.8426	53.8428	53.8422	53.8411	53.8392	53.8363	53.8326	53.8286
													617	8533.98	0.617	13831.4	53.1318	1.49137	0.00283055	0.00281869	0.00281474	0.00282659	0.0028464	0.00288224	0.00293446	0.00300352	0.00307762		52.9814	52.982	52.9822	52.9816	52.9805	52.9786	52.9759	52.9722	52.9683		106.823	106.825	106.825	106.824	106.822	106.818	106.812	106.805	106.797
													617.5	8473.76	0.6175	13722.7	52.7141	1.49136	0.0028299	0.00281804	0.0028141	0.00282594	0.00284575	0.00288159	0.0029338	0.00300286	0.00307694		52.565	52.5656	52.5658	52.5652	52.5641	52.5622	52.5595	52.5558	52.5519
													618	8433.81	0.618	13646.9	52.4232	1.49134	0.00282925	0.0028174	0.00281345	0.0028253	0.0028451	0.00288094	0.00293314	0.00300219	0.00307627		52.2749	52.2755	52.2757	52.2751	52.274	52.2721	52.2694	52.2658	52.2619		104.84	104.841	104.841	104.84	104.838	104.834	104.829	104.822	104.814
													618.5	8349.38	0.6185	13499.4	51.8564	1.49132	0.00282861	0.00281676	0.00281281	0.00282466	0.00284446	0.00288029	0.00293249	0.00300153	0.0030756		51.7097	51.7103	51.7105	51.7099	51.7089	51.707	51.7043	51.7007	51.6969
													619	8265.73	0.619	13353.4	51.2954	1.4913	0.00282797	0.00281612	0.00281217	0.00282401	0.00284381	0.00287964	0.00293184	0.00300087	0.00307493		51.1504	51.151	51.1512	51.1506	51.1495	51.1477	51.145	51.1415	51.1377		102.86	102.861	102.862	102.86	102.858	102.855	102.849	102.842	102.835
													619.5	8178.6	0.6195	13201.9	50.7137	1.49128	0.00282733	0.00281548	0.00281153	0.00282337	0.00284317	0.002879	0.00293118	0.00300021	0.00307426		50.5703	50.5709	50.5711	50.5705	50.5695	50.5677	50.5651	50.5616	50.5578
													620	8100.49	0.62	13065.3	50.1889	1.49127	0.00282669	0.00281484	0.0028109	0.00282274	0.00284253	0.00287835	0.00293053	0.00299955	0.0030736		50.047	50.0476	50.0478	50.0472	50.0462	50.0444	50.0418	50.0383	50.0346		100.617	100.619	100.619	100.618	100.616	100.612	100.607	100.6	100.592
													620.5	8021.57	0.6205	12927.6	49.6598	1.49125	0.00282605	0.0028142	0.00281026	0.0028221	0.00284189	0.00287771	0.00292989	0.00299889	0.00307293		49.5195	49.5201	49.5203	49.5197	49.5187	49.5169	49.5143	49.5109	49.5072
													621	7918.44	0.621	12751.1	48.982	1.49123	0.00282542	0.00281357	0.00280963	0.00282146	0.00284126	0.00287707	0.00292924	0.00299824	0.00307227		48.8436	48.8441	48.8443	48.8438	48.8428	48.841	48.8385	48.8351	48.8315		98.363	98.3642	98.3646	98.3634	98.3615	98.358	98.3528	98.346	98.3387
													621.5	7805.36	0.6215	12558.9	48.2436	1.49121	0.00282478	0.00281294	0.00280899	0.00282083	0.00284062	0.00287643	0.00292859	0.00299759	0.00307161		48.1073	48.1079	48.1081	48.1075	48.1066	48.1048	48.1023	48.099	48.0954
													622	7790.29	0.622	12524.6	48.1118	1.49119	0.00282415	0.00281231	0.00280836	0.0028202	0.00283999	0.00287579	0.00292795	0.00299694	0.00307095		47.9759	47.9765	47.9766	47.9761	47.9751	47.9734	47.9709	47.9676	47.964		96.0832	96.0843	96.0847	96.0836	96.0817	96.0782	96.0732	96.0666	96.0594
													622.5	7694.87	0.6225	12361.2	47.4843	1.49118	0.00282352	0.00281168	0.00280774	0.00281957	0.00283935	0.00287516	0.00292731	0.00299629	0.00307029		47.3502	47.3508	47.3509	47.3504	47.3494	47.3477	47.3453	47.342	47.3385
													623	7609.44	0.623	12214.2	46.9194	1.49116	0.00282289	0.00281105	0.00280711	0.00281894	0.00283872	0.00287452	0.00292667	0.00299564	0.00306963		46.787	46.7875	46.7877	46.7871	46.7862	46.7845	46.7821	46.7788	46.7754		94.1371	94.1383	94.1386	94.1375	94.1357	94.1323	94.1274	94.1208	94.1139
													623.5	7518.33	0.6235	12058.3	46.3205	1.49114	0.00282226	0.00281042	0.00280648	0.00281831	0.00283809	0.00287389	0.00292603	0.00299499	0.00306898		46.1897	46.1903	46.1905	46.1899	46.189	46.1873	46.1849	46.1817	46.1783
													624	7452.31	0.624	11942.8	45.8769	1.49112	0.00282164	0.0028098	0.00280586	0.00281769	0.00283746	0.00287325	0.00292539	0.00299435	0.00306833		45.7475	45.748	45.7482	45.7477	45.7468	45.7451	45.7427	45.7396	45.7362		91.9372	91.9383	91.9387	91.9376	91.9358	91.9325	91.9277	91.9213	91.9145
													624.5	7394.35	0.6245	11840.4	45.4836	1.49111	0.00282101	0.00280917	0.00280523	0.00281706	0.00283684	0.00287262	0.00292475	0.0029937	0.00306768		45.3553	45.3559	45.356	45.3555	45.3546	45.353	45.3506	45.3475	45.3441
													625	7288.15	0.625	11661	44.7945	1.49109	0.00282039	0.00280855	0.00280461	0.00281644	0.00283621	0.002872	0.00292412	0.00299306	0.00306703		44.6682	44.6687	44.6689	44.6684	44.6675	44.6659	44.6635	44.6605	44.6571		90.0235	90.0246	90.0249	90.0239	90.0221	90.0189	90.0141	90.0079	90.0012
													625.5	7225.35	0.6255	11551.3	44.3731	1.49107	0.00281977	0.00280793	0.00280399	0.00281582	0.00283559	0.00287137	0.00292349	0.00299242	0.00306638		44.248	44.2485	44.2487	44.2481	44.2473	44.2457	44.2434	44.2403	44.237
													626	7166.95	0.626	11448.8	43.9792	1.49105	0.00281915	0.00280731	0.00280337	0.0028152	0.00283497	0.00287074	0.00292285	0.00299178	0.00306573		43.8553	43.8558	43.8559	43.8554	43.8546	43.853	43.8507	43.8477	43.8444		88.1032	88.1043	88.1046	88.1036	88.1018	88.0987	88.094	88.088	88.0814
													626.5	7081.43	0.6265	11303.2	43.4198	1.49104	0.00281853	0.0028067	0.00280276	0.00281458	0.00283435	0.00287012	0.00292222	0.00299114	0.00306509		43.2974	43.2979	43.2981	43.2976	43.2967	43.2952	43.2929	43.2899	43.2867
													627	7019.67	0.627	11195.6	43.0068	1.49102	0.00281791	0.00280608	0.00280214	0.00281396	0.00283373	0.0028695	0.0029216	0.00299051	0.00306444		42.8856	42.8861	42.8863	42.8857	42.8849	42.8834	42.8811	42.8782	42.875		86.183	86.184	86.1844	86.1833	86.1816	86.1785	86.174	86.1681	86.1617
													627.5	6923.67	0.6275	11033.7	42.3848	1.491	0.00281729	0.00280546	0.00280153	0.00281335	0.00283311	0.00286887	0.00292097	0.00298987	0.0030638		42.2654	42.2659	42.2661	42.2656	42.2647	42.2632	42.261	42.2581	42.255
													628	6881.67	0.628	10958.1	42.0942	1.49098	0.00281668	0.00280485	0.00280092	0.00281273	0.00283249	0.00286825	0.00292034	0.00298924	0.00306316		41.9756	41.9761	41.9763	41.9758	41.9749	41.9734	41.9712	41.9683	41.9652		84.241	84.242	84.2423	84.2413	84.2397	84.2366	84.2322	84.2264	84.2202
													628.5	6782.32	0.6285	10791.3	41.4535	1.49097	0.00281607	0.00280424	0.0028003	0.00281212	0.00283188	0.00286764	0.00291972	0.00298861	0.00306252		41.3367	41.3372	41.3374	41.3369	41.3361	41.3346	41.3324	41.3296	41.3265
													629	6732.64	0.629	10703.7	41.1171	1.49095	0.00281546	0.00280363	0.00279969	0.00281151	0.00283127	0.00286702	0.0029191	0.00298798	0.00306188		41.0013	41.0018	41.002	41.0015	41.0007	40.9992	40.9971	40.9943	40.9912		82.3381	82.3391	82.3394	82.3384	82.3368	82.3338	82.3295	82.3238	82.3177
													629.5	6652.61	0.6295	10568.1	40.5961	1.49093	0.00281485	0.00280302	0.00279909	0.0028109	0.00283066	0.0028664	0.00291848	0.00298735	0.00306125		40.4818	40.4823	40.4825	40.482	40.4812	40.4797	40.4776	40.4748	40.4718
													630	6574.14	0.63	10435.1	40.0854	1.49092	0.00281424	0.00280241	0.00279848	0.00281029	0.00283005	0.00286579	0.00291786	0.00298673	0.00306061		39.9726	39.973	39.9732	39.9727	39.9719	39.9705	39.9684	39.9657	39.9627		80.4544	80.4554	80.4557	80.4547	80.4531	80.4502	80.446	80.4405	80.4345
													630.5	6501.24	0.6305	10311.2	39.6095	1.4909	0.00281363	0.00280181	0.00279787	0.00280969	0.00282944	0.00286518	0.00291724	0.0029861	0.00305998		39.498	39.4985	39.4986	39.4982	39.4974	39.496	39.4939	39.4912	39.4883
													631	6455.45	0.631	10230.5	39.2993	1.49088	0.00281303	0.0028012	0.00279727	0.00280908	0.00282883	0.00286457	0.00291662	0.00298548	0.00305935		39.1888	39.1893	39.1894	39.1889	39.1882	39.1868	39.1847	39.182	39.1791		78.6868	78.6877	78.688	78.6871	78.6856	78.6827	78.6786	78.6732	78.6674
													631.5	6391.24	0.6315	10120.7	38.8776	1.49086	0.00281242	0.0028006	0.00279667	0.00280848	0.00282822	0.00286396	0.00291601	0.00298486	0.00305872		38.7682	38.7687	38.7689	38.7684	38.7676	38.7662	38.7642	38.7615	38.7587
													632	6285.19	0.632	9944.92	38.2022	1.49085	0.00281182	0.0028	0.00279607	0.00280788	0.00282762	0.00286335	0.00291539	0.00298424	0.00305809		38.0948	38.0953	38.0954	38.095	38.0942	38.0929	38.0909	38.0882	38.0854		76.8631	76.864	76.8643	76.8634	76.8619	76.8591	76.8551	76.8498	76.8441
													632.5	6173.92	0.6325	9761.13	37.4963	1.49083	0.00281122	0.0027994	0.00279547	0.00280728	0.00282702	0.00286274	0.00291478	0.00298362	0.00305747		37.3908	37.3913	37.3914	37.391	37.3903	37.3889	37.387	37.3844	37.3816
													633	6119	0.633	9666.67	37.1334	1.49081	0.00281062	0.0027988	0.00279487	0.00280668	0.00282642	0.00286214	0.00291417	0.002983	0.00305684		37.029	37.0295	37.0296	37.0292	37.0284	37.0271	37.0252	37.0226	37.0199		74.4199	74.4208	74.421	74.4202	74.4187	74.416	74.4121	74.407	74.4015
													633.5	6103.65	0.6335	9634.81	37.011	1.4908	0.00281002	0.00279821	0.00279427	0.00280608	0.00282582	0.00286153	0.00291356	0.00298238	0.00305622		36.907	36.9075	36.9076	36.9072	36.9064	36.9051	36.9032	36.9006	36.8979
													634	6013.07	0.634	9484.34	36.433	1.49078	0.00280942	0.00279761	0.00279368	0.00280548	0.00282522	0.00286093	0.00291296	0.00298177	0.00305559		36.3306	36.3311	36.3312	36.3308	36.3301	36.3288	36.3269	36.3244	36.3217		73.2377	73.2385	73.2388	73.238	73.2365	73.2339	73.2301	73.225	73.2196
													634.5	5916.93	0.6345	9325.35	35.8223	1.49076	0.00280883	0.00279702	0.00279308	0.00280489	0.00282462	0.00286033	0.00291235	0.00298115	0.00305497		35.7216	35.7221	35.7222	35.7218	35.7211	35.7198	35.7179	35.7155	35.7128
													635	5883.33	0.635	9265.09	35.5908	1.49075	0.00280823	0.00279642	0.00279249	0.00280429	0.00282402	0.00285973	0.00291174	0.00298054	0.00305435		35.4908	35.4913	35.4914	35.491	35.4903	35.489	35.4872	35.4847	35.4821		71.2125	71.2133	71.2136	71.2128	71.2113	71.2088	71.2051	71.2002	71.1949
													635.5	5810.67	0.6355	9143.46	35.1235	1.49073	0.00280764	0.00279583	0.0027919	0.0028037	0.00282343	0.00285913	0.00291114	0.00297993	0.00305374		35.0249	35.0253	35.0255	35.0251	35.0244	35.0231	35.0213	35.0189	35.0163
													636	5756.45	0.636	9051.03	34.7685	1.49071	0.00280705	0.00279524	0.00279131	0.00280311	0.00282284	0.00285854	0.00291054	0.00297932	0.00305312		34.6709	34.6713	34.6714	34.671	34.6703	34.6691	34.6673	34.6649	34.6623		69.6958	69.6966	69.6969	69.6961	69.6947	69.6922	69.6886	69.6838	69.6786
													636.5	5673.55	0.6365	8913.67	34.2408	1.4907	0.00280646	0.00279465	0.00279072	0.00280252	0.00282225	0.00285794	0.00290994	0.00297872	0.0030525		34.1447	34.1451	34.1453	34.1449	34.1442	34.143	34.1412	34.1388	34.1363
													637	5608.59	0.637	8804.69	33.8222	1.49068	0.00280587	0.00279407	0.00279014	0.00280193	0.00282166	0.00285735	0.00290934	0.00297811	0.00305189		33.7273	33.7277	33.7278	33.7274	33.7268	33.7256	33.7238	33.7215	33.719		67.872	67.8728	67.8731	67.8723	67.871	67.8685	67.865	67.8603	67.8553
													637.5	5524.32	0.6375	8665.6	33.2879	1.49066	0.00280528	0.00279348	0.00278955	0.00280135	0.00282107	0.00285676	0.00290874	0.0029775	0.00305128		33.1945	33.1949	33.195	33.1947	33.194	33.1928	33.1911	33.1888	33.1863
													638	5463.38	0.638	8563.29	32.8949	1.49065	0.0028047	0.0027929	0.00278897	0.00280076	0.00282048	0.00285616	0.00290815	0.0029769	0.00305067		32.8026	32.803	32.8032	32.8028	32.8021	32.8009	32.7992	32.797	32.7945		65.9972	65.9979	65.9982	65.9974	65.9961	65.9938	65.9903	65.9858	65.9809
													638.5	5397.21	0.6385	8452.96	32.4711	1.49063	0.00280411	0.00279231	0.00278838	0.00280018	0.00281989	0.00285557	0.00290755	0.0029763	0.00305006		32.38	32.3804	32.3805	32.3801	32.3795	32.3783	32.3767	32.3744	32.372
													639	5299.86	0.639	8293.99	31.8604	1.49061	0.00280353	0.00279173	0.0027878	0.0027996	0.00281931	0.00285499	0.00290696	0.0029757	0.00304945		31.7711	31.7715	31.7716	31.7712	31.7706	31.7695	31.7678	31.7656	31.7633		64.1511	64.1519	64.1521	64.1514	64.1501	64.1478	64.1445	64.14	64.1353
													639.5	5246.07	0.6395	8203.4	31.5124	1.4906	0.00280295	0.00279115	0.00278722	0.00279901	0.00281873	0.0028544	0.00290636	0.0029751	0.00304885		31.4241	31.4245	31.4246	31.4242	31.4236	31.4225	31.4208	31.4187	31.4163
													640	5211	0.64	8142.19	31.2773	1.49058	0.00280237	0.00279057	0.00278664	0.00279843	0.00281814	0.00285381	0.00290577	0.0029745	0.00304824		31.1896	31.19	31.1901	31.1897	31.1891	31.188	31.1864	31.1842	31.1819		62.6137	62.6145	62.6147	62.614	62.6127	62.6105	62.6072	62.6029	62.5983
													640.5	5153.55	0.6405	8046.13	30.9083	1.49056	0.00280179	0.00278999	0.00278607	0.00279786	0.00281756	0.00285323	0.00290518	0.00297391	0.00304764		30.8217	30.8221	30.8222	30.8218	30.8212	30.8201	30.8185	30.8164	30.8141
													641	5092.73	0.641	7944.98	30.5197	1.49055	0.00280121	0.00278942	0.00278549	0.00279728	0.00281698	0.00285265	0.0029046	0.00297331	0.00304703		30.4342	30.4346	30.4347	30.4344	30.4338	30.4327	30.4311	30.429	30.4267		61.2559	61.2567	61.2569	61.2562	61.255	61.2528	61.2496	61.2454	61.2408
													641.5	5051.33	0.6415	7874.25	30.248	1.49053	0.00280064	0.00278884	0.00278492	0.0027967	0.00281641	0.00285207	0.00290401	0.00297272	0.00304643		30.1633	30.1637	30.1638	30.1634	30.1628	30.1618	30.1602	30.1581	30.1559
													642	4993.02	0.642	7777.29	29.8756	1.49052	0.00280006	0.00278827	0.00278434	0.00279613	0.00281583	0.00285149	0.00290342	0.00297212	0.00304583		29.7919	29.7923	29.7924	29.792	29.7914	29.7904	29.7888	29.7868	29.7846		59.9552	59.9559	59.9562	59.9555	59.9543	59.9521	59.949	59.9449	59.9405
													642.5	4948.06	0.6425	7701.26	29.5835	1.4905	0.00279949	0.0027877	0.00278377	0.00279556	0.00281526	0.00285091	0.00290284	0.00297153	0.00304524		29.5007	29.501	29.5012	29.5008	29.5002	29.4992	29.4976	29.4956	29.4934
													643	4863.88	0.643	7564.36	29.0576	1.49048	0.00279892	0.00278713	0.0027832	0.00279498	0.00281468	0.00285033	0.00290226	0.00297094	0.00304464		28.9763	28.9766	28.9767	28.9764	28.9758	28.9748	28.9733	28.9713	28.9691		58.477	58.4777	58.4779	58.4772	58.476	58.474	58.4709	58.4669	58.4626
													643.5	4796.84	0.6435	7454.3	28.6348	1.49047	0.00279835	0.00278656	0.00278263	0.00279441	0.00281411	0.00284975	0.00290168	0.00297036	0.00304404		28.5547	28.555	28.5551	28.5548	28.5542	28.5532	28.5517	28.5498	28.5477
													644	4734.87	0.644	7352.28	28.2429	1.49045	0.00279778	0.00278599	0.00278206	0.00279384	0.00281354	0.00284918	0.0029011	0.00296977	0.00304345		28.1639	28.1642	28.1644	28.164	28.1635	28.1625	28.161	28.1591	28.157		56.7186	56.7193	56.7195	56.7188	56.7177	56.7157	56.7127	56.7088	56.7046
													644.5	4709.73	0.6445	7307.57	28.0712	1.49043	0.00279721	0.00278542	0.0027815	0.00279328	0.00281297	0.00284861	0.00290052	0.00296918	0.00304286		27.9927	27.993	27.9931	27.9928	27.9922	27.9912	27.9898	27.9879	27.9858
													645	4675.01	0.645	7248.07	27.8426	1.49042	0.00279664	0.00278485	0.00278093	0.00279271	0.0028124	0.00284803	0.00289994	0.0029686	0.00304227		27.7648	27.7651	27.7652	27.7649	27.7643	27.7633	27.7619	27.76	27.7579		55.7575	55.7581	55.7583	55.7577	55.7566	55.7546	55.7517	55.7478	55.7437
													645.5	4569.93	0.6455	7079.67	27.1957	1.4904	0.00279608	0.00278429	0.00278037	0.00279214	0.00281183	0.00284746	0.00289936	0.00296802	0.00304168		27.1197	27.12	27.1201	27.1198	27.1193	27.1183	27.1169	27.115	27.113
													646	4536.97	0.646	7023.18	26.9787	1.49039	0.00279551	0.00278373	0.00277981	0.00279158	0.00281127	0.00284689	0.00289879	0.00296744	0.00304109		26.9033	26.9036	26.9037	26.9034	26.9029	26.9019	26.9005	26.8987	26.8967		54.023	54.0237	54.0239	54.0232	54.0222	54.0202	54.0174	54.0137	54.0097
													646.5	4498.88	0.6465	6958.82	26.7315	1.49037	0.00279495	0.00278317	0.00277924	0.00279102	0.0028107	0.00284632	0.00289822	0.00296686	0.0030405		26.6568	26.6571	26.6572	26.6569	26.6564	26.6554	26.654	26.6522	26.6502
													647	4453.31	0.647	6883.02	26.4403	1.49036	0.00279439	0.0027826	0.00277868	0.00279046	0.00281014	0.00284576	0.00289765	0.00296628	0.00303992		26.3664	26.3668	26.3669	26.3665	26.366	26.3651	26.3637	26.3619	26.36		53.0233	53.0239	53.0241	53.0235	53.0224	53.0205	53.0178	53.0141	53.0102
													647.5	4381.63	0.6475	6767	25.9947	1.49034	0.00279383	0.00278205	0.00277812	0.0027899	0.00280958	0.00284519	0.00289707	0.0029657	0.00303933		25.922	25.9223	25.9224	25.9221	25.9216	25.9207	25.9193	25.9176	25.9157
													648	4328.42	0.648	6679.67	25.6592	1.49032	0.00279327	0.00278149	0.00277757	0.00278934	0.00280902	0.00284463	0.00289651	0.00296512	0.00303875		25.5875	25.5878	25.5879	25.5876	25.5871	25.5862	25.5849	25.5831	25.5812		51.5095	51.5101	51.5103	51.5097	51.5087	51.5069	51.5042	51.5007	51.4969
													648.5	4291.41	0.6485	6617.45	25.4202	1.49031	0.00279271	0.00278093	0.00277701	0.00278878	0.00280846	0.00284407	0.00289594	0.00296455	0.00303817		25.3492	25.3495	25.3496	25.3493	25.3488	25.3479	25.3465	25.3448	25.3429
													649	4212.23	0.649	6490.33	24.9319	1.49029	0.00279215	0.00278038	0.00277646	0.00278822	0.0028079	0.0028435	0.00289537	0.00296398	0.00303759		24.8623	24.8626	24.8626	24.8624	24.8619	24.861	24.8597	24.858	24.8561		50.2114	50.212	50.2122	50.2116	50.2106	50.2088	50.2062	50.2028	50.1991
													649.5	4185.44	0.6495	6444.1	24.7543	1.49028	0.0027916	0.00277982	0.0027759	0.00278767	0.00280734	0.00284294	0.0028948	0.0029634	0.00303701		24.6852	24.6855	24.6856	24.6853	24.6848	24.6839	24.6826	24.6809	24.6791
													650	4132.12	0.65	6357.11	24.4201	1.49026	0.00279104	0.00277927	0.00277535	0.00278711	0.00280679	0.00284238	0.00289424	0.00296283	0.00303643		24.3519	24.3522	24.3523	24.352	24.3516	24.3507	24.3494	24.3477	24.3459		49.0371	49.0377	49.0379	49.0373	49.0363	49.0346	49.032	49.0287	49.025
													650.5	4085.86	0.6505	6281.11	24.1282	1.49024	0.00279049	0.00277872	0.0027748	0.00278656	0.00280623	0.00284183	0.00289368	0.00296226	0.00303585		24.0608	24.0611	24.0612	24.0609	24.0605	24.0596	24.0583	24.0567	24.0549
													651	4051.59	0.651	6223.64	23.9074	1.49023	0.00278994	0.00277817	0.00277425	0.00278601	0.00280568	0.00284127	0.00289312	0.0029617	0.00303528		23.8407	23.841	23.8411	23.8408	23.8403	23.8395	23.8382	23.8366	23.8348		47.9015	47.9021	47.9023	47.9017	47.9008	47.899	47.8966	47.8933	47.8897
													651.5	3987.11	0.6515	6119.89	23.5088	1.49021	0.00278939	0.00277762	0.0027737	0.00278546	0.00280513	0.00284071	0.00289256	0.00296113	0.0030347		23.4433	23.4435	23.4436	23.4434	23.4429	23.4421	23.4408	23.4392	23.4375
													652	3913.07	0.652	6001.64	23.0546	1.4902	0.00278884	0.00277707	0.00277315	0.00278491	0.00280458	0.00284016	0.002892	0.00296056	0.00303413		22.9903	22.9906	22.9907	22.9904	22.99	22.9891	22.988	22.9864	22.9847		46.4336	46.4341	46.4343	46.4338	46.4329	46.4312	46.4288	46.4256	46.4222
													652.5	3874.63	0.6525	5938.14	22.8107	1.49018	0.00278829	0.00277652	0.00277261	0.00278437	0.00280403	0.00283961	0.00289144	0.00296	0.00303356		22.7471	22.7473	22.7474	22.7472	22.7467	22.7459	22.7447	22.7431	22.7415
													653	3839.3	0.653	5879.48	22.5853	1.49017	0.00278774	0.00277598	0.00277206	0.00278382	0.00280348	0.00283906	0.00289088	0.00295944	0.00303299		22.5224	22.5227	22.5227	22.5225	22.522	22.5212	22.5201	22.5185	22.5168		45.2694	45.27	45.2702	45.2696	45.2687	45.2671	45.2648	45.2617	45.2583
													653.5	3813.4	0.6535	5835.35	22.4158	1.49015	0.0027872	0.00277543	0.00277152	0.00278327	0.00280293	0.00283851	0.00289033	0.00295887	0.00303242		22.3533	22.3536	22.3537	22.3534	22.353	22.3522	22.351	22.3495	22.3478
													654	3765.53	0.654	5757.7	22.1175	1.49014	0.00278666	0.00277489	0.00277097	0.00278273	0.00280239	0.00283796	0.00288977	0.00295831	0.00303185		22.0559	22.0562	22.0562	22.056	22.0555	22.0548	22.0536	22.0521	22.0505		44.4092	44.4098	44.4099	44.4094	44.4085	44.4069	44.4046	44.4016	44.3983
													654.5	3708.57	0.6545	5666.26	21.7663	1.49012	0.00278611	0.00277435	0.00277043	0.00278219	0.00280184	0.00283741	0.00288922	0.00295775	0.00303129		21.7057	21.7059	21.706	21.7057	21.7053	21.7045	21.7034	21.7019	21.7003
													655	3672.23	0.655	5606.46	21.5366	1.49011	0.00278557	0.00277381	0.00276989	0.00278165	0.0028013	0.00283686	0.00288867	0.0029572	0.00303072		21.4766	21.4768	21.4769	21.4767	21.4763	21.4755	21.4744	21.4729	21.4713		43.1822	43.1828	43.1829	43.1824	43.1816	43.18	43.1778	43.1748	43.1716
													655.5	3623.37	0.6555	5527.65	21.2338	1.49009	0.00278503	0.00277327	0.00276935	0.00278111	0.00280076	0.00283632	0.00288812	0.00295664	0.00303016		21.1747	21.1749	21.175	21.1748	21.1743	21.1736	21.1725	21.171	21.1695
													656	3566.96	0.656	5437.44	20.8873	1.49008	0.00278449	0.00277273	0.00276882	0.00278057	0.00280021	0.00283577	0.00288757	0.00295608	0.0030296		20.8291	20.8294	20.8295	20.8292	20.8288	20.8281	20.827	20.8256	20.824		42.0038	42.0043	42.0045	42.004	42.0032	42.0017	41.9995	41.9966	41.9935
													656.5	3518.91	0.6565	5360.1	20.5902	1.49006	0.00278395	0.00277219	0.00276828	0.00278003	0.00279968	0.00283523	0.00288702	0.00295553	0.00302904		20.5329	20.5331	20.5332	20.533	20.5326	20.5318	20.5308	20.5294	20.5278
													657	3482.75	0.657	5300.98	20.3631	1.49004	0.00278342	0.00277166	0.00276774	0.00277949	0.00279914	0.00283469	0.00288647	0.00295498	0.00302848		20.3064	20.3067	20.3068	20.3065	20.3061	20.3054	20.3043	20.3029	20.3014		40.8393	40.8398	40.84	40.8395	40.8387	40.8372	40.8351	40.8323	40.8293
													657.5	3438.89	0.6575	5230.25	20.0914	1.49003	0.00278288	0.00277112	0.00276721	0.00277896	0.0027986	0.00283415	0.00288593	0.00295442	0.00302792		20.0355	20.0357	20.0358	20.0356	20.0352	20.0344	20.0334	20.032	20.0306
													658	3400.31	0.658	5167.65	19.8509	1.49001	0.00278235	0.00277059	0.00276668	0.00277842	0.00279806	0.00283361	0.00288538	0.00295387	0.00302736		19.7957	19.7959	19.796	19.7958	19.7954	19.7947	19.7937	19.7923	19.7908		39.8312	39.8316	39.8318	39.8313	39.8305	39.8291	39.8271	39.8243	39.8214
													658.5	3372	0.6585	5120.73	19.6707	1.49	0.00278181	0.00277006	0.00276614	0.00277789	0.00279753	0.00283307	0.00288484	0.00295332	0.0030268		19.616	19.6162	19.6163	19.616	19.6157	19.615	19.6139	19.6126	19.6112
													659	3317.59	0.659	5034.29	19.3386	1.48998	0.00278128	0.00276953	0.00276561	0.00277736	0.002797	0.00283253	0.0028843	0.00295278	0.00302625		19.2848	19.2851	19.2851	19.2849	19.2845	19.2839	19.2829	19.2815	19.2801		38.9008	38.9013	38.9014	38.901	38.9002	38.8988	38.8968	38.8941	38.8913
													659.5	3256.83	0.6595	4938.34	18.9701	1.48997	0.00278075	0.002769	0.00276508	0.00277683	0.00279646	0.002832	0.00288376	0.00295223	0.00302569		18.9173	18.9175	18.9176	18.9174	18.917	18.9163	18.9153	18.9141	18.9127
													660	3207.33	0.66	4859.6	18.6676	1.48995	0.00278022	0.00276847	0.00276456	0.0027763	0.00279593	0.00283146	0.00288322	0.00295168	0.00302514		18.6157	18.6159	18.616	18.6158	18.6154	18.6147	18.6138	18.6125	18.6111		37.533	37.5334	37.5336	37.5331	37.5324	37.5311	37.5291	37.5265	37.5238
													660.5	3181.99	0.6605	4817.55	18.5061	1.48994	0.00277969	0.00276794	0.00276403	0.00277577	0.0027954	0.00283093	0.00288268	0.00295114	0.00302459		18.4546	18.4549	18.4549	18.4547	18.4543	18.4537	18.4527	18.4515	18.4501
													661	3160.89	0.661	4781.99	18.3695	1.48992	0.00277916	0.00276741	0.0027635	0.00277524	0.00279487	0.0028304	0.00288214	0.0029506	0.00302404		18.3184	18.3186	18.3187	18.3185	18.3181	18.3175	18.3165	18.3153	18.3139		36.773	36.7735	36.7736	36.7732	36.7725	36.7711	36.7692	36.7667	36.764
													661.5	3113.04	0.6615	4706.03	18.0777	1.48991	0.00277864	0.00276689	0.00276298	0.00277472	0.00279434	0.00282987	0.00288161	0.00295005	0.00302349		18.0274	18.0277	18.0277	18.0275	18.0272	18.0265	18.0256	18.0243	18.023
													662	3060.03	0.662	4622.41	17.7564	1.48989	0.00277811	0.00276636	0.00276245	0.00277419	0.00279382	0.00282934	0.00288107	0.00294951	0.00302294		17.7071	17.7073	17.7074	17.7072	17.7068	17.7062	17.7053	17.7041	17.7028		35.7346	35.735	35.7351	35.7347	35.734	35.7327	35.7309	35.7284	35.7258
													662.5	2996.75	0.6625	4523.4	17.3761	1.48988	0.00277759	0.00276584	0.00276193	0.00277367	0.00279329	0.00282881	0.00288054	0.00294897	0.0030224		17.3279	17.3281	17.3281	17.3279	17.3276	17.327	17.3261	17.3249	17.3236
													663	2961.24	0.663	4466.43	17.1573	1.48986	0.00277707	0.00276532	0.00276141	0.00277315	0.00279277	0.00282828	0.00288001	0.00294843	0.00302185		17.1096	17.1098	17.1099	17.1097	17.1094	17.1087	17.1079	17.1067	17.1054		34.4375	34.4379	34.438	34.4376	34.4369	34.4357	34.4339	34.4316	34.429
													663.5	2927.28	0.6635	4411.88	16.9477	1.48985	0.00277654	0.0027648	0.00276089	0.00277263	0.00279225	0.00282775	0.00287948	0.0029479	0.00302131		16.9007	16.9009	16.9009	16.9007	16.9004	16.8998	16.8989	16.8978	16.8965
													664	2859.45	0.664	4306.4	16.5425	1.48984	0.00277602	0.00276428	0.00276037	0.00277211	0.00279172	0.00282723	0.00287895	0.00294736	0.00302077		16.4966	16.4968	16.4969	16.4967	16.4964	16.4958	16.4949	16.4938	16.4926		33.3973	33.3977	33.3978	33.3974	33.3968	33.3956	33.3938	33.3915	33.3891
													664.5	2836.12	0.6645	4268.05	16.3952	1.48982	0.0027755	0.00276376	0.00275985	0.00277159	0.0027912	0.0028267	0.00287842	0.00294683	0.00302022		16.3497	16.3499	16.35	16.3498	16.3495	16.3489	16.348	16.3469	16.3457
													665	2806.92	0.665	4220.93	16.2142	1.48981	0.00277499	0.00276325	0.00275934	0.00277107	0.00279068	0.00282618	0.00287789	0.00294629	0.00301968		16.1692	16.1694	16.1695	16.1693	16.169	16.1684	16.1676	16.1665	16.1653		32.519	32.5193	32.5195	32.5191	32.5185	32.5173	32.5156	32.5134	32.511
													665.5	2759	0.6655	4145.76	15.9254	1.48979	0.00277447	0.00276273	0.00275882	0.00277055	0.00279016	0.00282566	0.00287736	0.00294576	0.00301915		15.8813	15.8814	15.8815	15.8813	15.881	15.8804	15.8796	15.8785	15.8774
													666	2739.53	0.666	4113.41	15.8012	1.48978	0.00277395	0.00276221	0.00275831	0.00277004	0.00278965	0.00282514	0.00287684	0.00294523	0.00301861		15.7574	15.7576	15.7576	15.7574	15.7571	15.7566	15.7557	15.7547	15.7535		31.6386	31.639	31.6391	31.6388	31.6381	31.637	31.6354	31.6332	31.6309
													666.5	2696.85	0.6665	4046.29	15.5433	1.48976	0.00277344	0.0027617	0.00275779	0.00276952	0.00278913	0.00282462	0.00287631	0.0029447	0.00301807		15.5002	15.5004	15.5005	15.5003	15.5	15.4994	15.4986	15.4976	15.4964
													667	2636.03	0.667	3952.07	15.1814	1.48975	0.00277292	0.00276119	0.00275728	0.00276901	0.00278862	0.0028241	0.00287579	0.00294417	0.00301753		15.1393	15.1395	15.1396	15.1394	15.1391	15.1386	15.1378	15.1367	15.1356		30.6396	30.6399	30.6401	30.6397	30.6391	30.638	30.6364	30.6343	30.6321
													667.5	2585.1	0.6675	3872.81	14.8769	1.48973	0.00277241	0.00276068	0.00275677	0.0027685	0.0027881	0.00282358	0.00287527	0.00294364	0.003017		14.8357	14.8359	14.8359	14.8358	14.8355	14.8349	14.8342	14.8331	14.8321
													668	2555.67	0.668	3825.85	14.6966	1.48972	0.0027719	0.00276017	0.00275626	0.00276799	0.00278759	0.00282307	0.00287475	0.00294311	0.00301647		14.6558	14.656	14.656	14.6559	14.6556	14.6551	14.6543	14.6533	14.6522		29.4915	29.4919	29.492	29.4916	29.491	29.49	29.4885	29.4864	29.4843
													668.5	2521.12	0.6685	3771.31	14.487	1.4897	0.00277139	0.00275966	0.00275575	0.00276748	0.00278708	0.00282255	0.00287423	0.00294259	0.00301593		14.4469	14.4471	14.4471	14.4469	14.4467	14.4461	14.4454	14.4444	14.4433
													669	2494.43	0.669	3728.59	14.3229	1.48969	0.00277088	0.00275915	0.00275524	0.00276697	0.00278657	0.00282204	0.00287371	0.00294206	0.0030154		14.2833	14.2834	14.2835	14.2833	14.283	14.2825	14.2818	14.2808	14.2798		28.7301	28.7305	28.7306	28.7303	28.7297	28.7287	28.7272	28.7252	28.7231
													669.5	2442.67	0.6695	3648.5	14.0153	1.48967	0.00277037	0.00275864	0.00275474	0.00276646	0.00278606	0.00282153	0.00287319	0.00294154	0.00301487		13.9765	13.9766	13.9767	13.9765	13.9763	13.9758	13.975	13.9741	13.9731
													670	2384	0.67	3558.21	13.6685	1.48966	0.00276987	0.00275814	0.00275423	0.00276595	0.00278555	0.00282101	0.00287268	0.00294102	0.00301434		13.6306	13.6308	13.6308	13.6306	13.6304	13.6299	13.6292	13.6283	13.6272		27.6071	27.6074	27.6075	27.6072	27.6066	27.6057	27.6042	27.6023	27.6003
													670.5	2364.13	0.6705	3525.93	13.5444	1.48965	0.00276936	0.00275763	0.00275373	0.00276545	0.00278504	0.0028205	0.00287216	0.0029405	0.00301382		13.5069	13.5071	13.5071	13.507	13.5067	13.5062	13.5055	13.5046	13.5036
													671	2332.8	0.671	3476.61	13.355	1.48963	0.00276886	0.00275713	0.00275322	0.00276494	0.00278454	0.00281999	0.00287165	0.00293998	0.00301329		13.318	13.3182	13.3182	13.3181	13.3178	13.3173	13.3166	13.3157	13.3147		26.8249	26.8253	26.8254	26.825	26.8245	26.8236	26.8222	26.8203	26.8184
													671.5	2303.23	0.6715	3429.98	13.1759	1.48962	0.00276835	0.00275662	0.00275272	0.00276444	0.00278403	0.00281949	0.00287114	0.00293946	0.00301277		13.1394	13.1396	13.1396	13.1395	13.1392	13.1387	13.1381	13.1372	13.1362
													672	2266.88	0.672	3373.34	12.9583	1.4896	0.00276785	0.00275612	0.00275222	0.00276394	0.00278353	0.00281898	0.00287062	0.00293894	0.00301224		12.9224	12.9226	12.9226	12.9225	12.9222	12.9218	12.9211	12.9202	12.9193		26.0618	26.0621	26.0622	26.0619	26.0614	26.0605	26.0591	26.0574	26.0554
													672.5	2240.4	0.6725	3331.45	12.7974	1.48959	0.00276735	0.00275562	0.00275172	0.00276344	0.00278302	0.00281847	0.00287011	0.00293842	0.00301172		12.762	12.7621	12.7622	12.762	12.7618	12.7613	12.7607	12.7598	12.7588
													673	2197.92	0.673	3265.85	12.5454	1.48957	0.00276685	0.00275512	0.00275122	0.00276294	0.00278252	0.00281797	0.0028696	0.00293791	0.0030112		12.5107	12.5108	12.5109	12.5107	12.5105	12.5101	12.5094	12.5085	12.5076		25.2727	25.273	25.2731	25.2728	25.2723	25.2714	25.2701	25.2683	25.2665
													673.5	2172.37	0.6735	3225.49	12.3903	1.48956	0.00276635	0.00275462	0.00275072	0.00276244	0.00278202	0.00281746	0.00286909	0.00293739	0.00301067		12.3561	12.3562	12.3563	12.3561	12.3559	12.3554	12.3548	12.3539	12.353
													674	2157.56	0.674	3201.13	12.2968	1.48955	0.00276585	0.00275413	0.00275023	0.00276194	0.00278152	0.00281696	0.00286859	0.00293688	0.00301016		12.2628	12.2629	12.2629	12.2628	12.2626	12.2621	12.2615	12.2606	12.2597		24.6188	24.6191	24.6192	24.6189	24.6184	24.6176	24.6163	24.6146	24.6128
													674.5	2101.11	0.6745	3115.06	11.9662	1.48953	0.00276535	0.00275363	0.00274973	0.00276144	0.00278102	0.00281646	0.00286808	0.00293637	0.00300964		11.9331	11.9332	11.9333	11.9331	11.9329	11.9325	11.9318	11.931	11.9301
													675	2070.77	0.675	3067.81	11.7846	1.48952	0.00276486	0.00275314	0.00274924	0.00276095	0.00278052	0.00281596	0.00286758	0.00293586	0.00300912		11.7521	11.7522	11.7522	11.7521	11.7519	11.7515	11.7509	11.7501	11.7492		23.6851	23.6854	23.6855	23.6852	23.6848	23.6839	23.6827	23.6811	23.6793
													675.5	2065.12	0.6755	3057.17	11.7438	1.4895	0.00276436	0.00275264	0.00274874	0.00276045	0.00278003	0.00281546	0.00286707	0.00293535	0.0030086		11.7113	11.7114	11.7115	11.7113	11.7111	11.7107	11.7101	11.7093	11.7084
													676	2007.96	0.676	2970.35	11.4103	1.48949	0.00276387	0.00275215	0.00274825	0.00275996	0.00277953	0.00281496	0.00286657	0.00293484	0.00300809		11.3787	11.3789	11.3789	11.3788	11.3786	11.3782	11.3776	11.3768	11.376		23.09	23.0903	23.0904	23.0901	23.0897	23.0889	23.0877	23.0861	23.0844
													676.5	1991.61	0.6765	2944	11.309	1.48948	0.00276337	0.00275166	0.00274776	0.00275947	0.00277904	0.00281446	0.00286607	0.00293433	0.00300757		11.2778	11.2779	11.278	11.2778	11.2776	11.2772	11.2766	11.2758	11.275
													677	1971.07	0.677	2911.47	11.1841	1.48946	0.00276288	0.00275117	0.00274727	0.00275897	0.00277854	0.00281397	0.00286557	0.00293382	0.00300706		11.1532	11.1533	11.1534	11.1532	11.153	11.1526	11.152	11.1513	11.1505		22.431	22.4312	22.4313	22.4311	22.4306	22.4298	22.4287	22.4271	22.4255
													677.5	1946.93	0.6775	2873.7	11.039	1.48945	0.00276239	0.00275068	0.00274678	0.00275848	0.00277805	0.00281347	0.00286507	0.00293332	0.00300655		11.0085	11.0086	11.0087	11.0085	11.0083	11.0079	11.0074	11.0066	11.0058
													678	1915.18	0.678	2824.74	10.8509	1.48943	0.0027619	0.00275019	0.00274629	0.00275799	0.00277756	0.00281298	0.00286457	0.00293281	0.00300604		10.821	10.8211	10.8211	10.821	10.8208	10.8204	10.8198	10.8191	10.8183		21.8295	21.8297	21.8298	21.8295	21.8291	21.8283	21.8272	21.8257	21.8241
													678.5	1880.02	0.6785	2770.85	10.6439	1.48942	0.00276141	0.0027497	0.0027458	0.0027575	0.00277707	0.00281248	0.00286407	0.00293231	0.00300553		10.6145	10.6146	10.6147	10.6145	10.6143	10.614	10.6134	10.6127	10.6119
													679	1880.49	0.679	2769.5	10.6387	1.48941	0.00276092	0.00274921	0.00274532	0.00275702	0.00277658	0.00281199	0.00286357	0.0029318	0.00300502		10.6093	10.6095	10.6095	10.6094	10.6092	10.6088	10.6082	10.6075	10.6067		21.2238	21.2241	21.2242	21.2239	21.2235	21.2228	21.2217	21.2202	21.2186
													679.5	1857.32	0.6795	2733.36	10.4999	1.48939	0.00276044	0.00274873	0.00274483	0.00275653	0.00277609	0.0028115	0.00286308	0.0029313	0.00300451		10.4709	10.471	10.4711	10.471	10.4707	10.4704	10.4698	10.4691	10.4684
													680	1835.02	0.68	2698.56	10.3662	1.48938	0.00275995	0.00274824	0.00274435	0.00275605	0.00277561	0.00281101	0.00286258	0.0029308	0.003004		10.3376	10.3377	10.3378	10.3376	10.3374	10.3371	10.3365	10.3358	10.3351		20.8085	20.8087	20.8088	20.8086	20.8082	20.8074	20.8064	20.8049	20.8034
													680.5	1815.03	0.6805	2667.21	10.2458	1.48937	0.00275947	0.00274776	0.00274386	0.00275556	0.00277512	0.00281052	0.00286209	0.0029303	0.0030035		10.2175	10.2176	10.2177	10.2175	10.2173	10.217	10.2164	10.2157	10.215
													681	1786.41	0.681	2623.22	10.0768	1.48935	0.00275898	0.00274728	0.00274338	0.00275508	0.00277464	0.00281003	0.0028616	0.00292981	0.00300299		10.049	10.0491	10.0491	10.049	10.0488	10.0485	10.048	10.0473	10.0465		20.2665	20.2667	20.2668	20.2666	20.2662	20.2654	20.2644	20.263	20.2615
													681.5	1757.11	0.6815	2578.29	9.90422	1.48934	0.0027585	0.00274679	0.0027429	0.0027546	0.00277415	0.00280954	0.0028611	0.00292931	0.00300249		9.8769	9.87701	9.87705	9.87693	9.87674	9.87639	9.87588	9.8752	9.87448
													682	1735.93	0.682	2545.36	9.7777	1.48932	0.00275802	0.00274631	0.00274242	0.00275411	0.00277367	0.00280906	0.00286061	0.00292881	0.00300199		9.75073	9.75084	9.75088	9.75077	9.75057	9.75023	9.74972	9.74906	9.74834		19.6276	19.6279	19.6279	19.6277	19.6273	19.6266	19.6256	19.6243	19.6228
													682.5	1714.33	0.6825	2511.84	9.64896	1.48931	0.00275754	0.00274583	0.00274194	0.00275363	0.00277319	0.00280857	0.00286012	0.00292832	0.00300149		9.62235	9.62246	9.6225	9.62239	9.6222	9.62186	9.62136	9.6207	9.62
													683	1684.6	0.683	2466.47	9.47467	1.4893	0.00275706	0.00274536	0.00274146	0.00275315	0.00277271	0.00280809	0.00285964	0.00292782	0.00300099		9.44854	9.44865	9.44869	9.44858	9.4484	9.44806	9.44757	9.44693	9.44623		19.0709	19.0711	19.0712	19.071	19.0706	19.0699	19.0689	19.0676	19.0662
													683.5	1686.28	0.6835	2467.13	9.47718	1.48928	0.00275658	0.00274488	0.00274098	0.00275268	0.00277223	0.00280761	0.00285915	0.00292733	0.00300049		9.45106	9.45117	9.45121	9.4511	9.45091	9.45057	9.45009	9.44944	9.44875
													684	1677.05	0.684	2451.83	9.41843	1.48927	0.0027561	0.0027444	0.00274051	0.0027522	0.00277175	0.00280712	0.00285866	0.00292684	0.00299999		9.39247	9.39258	9.39262	9.39251	9.39233	9.39199	9.39151	9.39087	9.39018		18.8435	18.8438	18.8438	18.8436	18.8432	18.8426	18.8416	18.8403	18.8389
													684.5	1644.83	0.6845	2402.97	9.23072	1.48926	0.00275563	0.00274393	0.00274003	0.00275172	0.00277127	0.00280664	0.00285818	0.00292635	0.00299949		9.20528	9.20539	9.20542	9.20532	9.20514	9.20481	9.20433	9.2037	9.20303
													685	1617.21	0.685	2360.9	9.06911	1.48924	0.00275515	0.00274345	0.00273956	0.00275125	0.00277079	0.00280616	0.00285769	0.00292586	0.002999		9.04412	9.04423	9.04426	9.04416	9.04398	9.04366	9.04319	9.04257	9.04191		18.2494	18.2496	18.2497	18.2495	18.2491	18.2485	18.2475	18.2463	18.2449
													685.5	1581.71	0.6855	2307.38	8.86352	1.48923	0.00275468	0.00274298	0.00273908	0.00275077	0.00277032	0.00280568	0.00285721	0.00292537	0.0029985		8.8391	8.8392	8.83924	8.83914	8.83896	8.83865	8.83819	8.83759	8.83694
													686	1543.85	0.686	2250.52	8.64509	1.48922	0.0027542	0.00274251	0.00273861	0.0027503	0.00276984	0.00280521	0.00285673	0.00292488	0.00299801		8.62128	8.62139	8.62142	8.62132	8.62115	8.62084	8.6204	8.61981	8.61918		17.4604	17.4606	17.4607	17.4605	17.4601	17.4595	17.4586	17.4574	17.4561
													686.5	1515.52	0.6865	2207.61	8.48027	1.4892	0.00275373	0.00274203	0.00273814	0.00274983	0.00276937	0.00280473	0.00285625	0.00292439	0.00299751		8.45692	8.45702	8.45705	8.45695	8.45679	8.45649	8.45605	8.45547	8.45485
													687	1495.57	0.687	2176.96	8.36255	1.48919	0.00275326	0.00274156	0.00273767	0.00274936	0.00276889	0.00280425	0.00285577	0.00292391	0.00299702		8.33953	8.33963	8.33966	8.33956	8.3394	8.3391	8.33867	8.3381	8.33749		16.7964	16.7966	16.7967	16.7965	16.7962	16.7956	16.7947	16.7936	16.7923
													687.5	1490.64	0.6875	2168.2	8.3289	1.48918	0.00275279	0.00274109	0.0027372	0.00274889	0.00276842	0.00280378	0.00285529	0.00292342	0.00299653		8.30598	8.30607	8.30611	8.30601	8.30585	8.30555	8.30512	8.30456	8.30395
													688	1472.2	0.688	2139.82	8.21987	1.48916	0.00275232	0.00274062	0.00273673	0.00274842	0.00276795	0.00280331	0.00285481	0.00292294	0.00299604		8.19725	8.19734	8.19738	8.19728	8.19712	8.19683	8.19641	8.19585	8.19524		16.5032	16.5034	16.5035	16.5033	16.503	16.5024	16.5015	16.5004	16.4992
													688.5	1432	0.6885	2079.88	7.98963	1.48915	0.00275185	0.00274016	0.00273627	0.00274795	0.00276748	0.00280283	0.00285433	0.00292245	0.00299555		7.96765	7.96774	7.96777	7.96768	7.96752	7.96724	7.96683	7.96628	7.9657
													689	1429.67	0.689	2074.99	7.97083	1.48914	0.00275138	0.00273969	0.0027358	0.00274748	0.00276701	0.00280236	0.00285385	0.00292197	0.00299506		7.9489	7.94899	7.94902	7.94893	7.94877	7.94849	7.94808	7.94754	7.94695		15.9165	15.9167	15.9168	15.9166	15.9163	15.9157	15.9149	15.9138	15.9127
													689.5	1392.08	0.6895	2018.98	7.75567	1.48912	0.00275091	0.00273922	0.00273533	0.00274702	0.00276654	0.00280189	0.00285338	0.00292149	0.00299458		7.73433	7.73442	7.73446	7.73436	7.73421	7.73394	7.73354	7.73301	7.73244
													690	1376.96	0.69	1995.59	7.66585	1.48911	0.00275045	0.00273876	0.00273487	0.00274655	0.00276608	0.00280142	0.0028529	0.00292101	0.00299409		7.64476	7.64485	7.64488	7.64479	7.64464	7.64437	7.64398	7.64345	7.64289		15.3791	15.3793	15.3793	15.3792	15.3789	15.3783	15.3775	15.3765	15.3753
													690.5	1354.89	0.6905	1962.19	7.53751	1.4891	0.00274998	0.0027383	0.00273441	0.00274609	0.00276561	0.00280095	0.00285243	0.00292053	0.00299361		7.51678	7.51687	7.5169	7.51681	7.51666	7.5164	7.51601	7.5155	7.51494
													691	1306.32	0.691	1890.48	7.26205	1.48908	0.00274952	0.00273783	0.00273394	0.00274562	0.00276515	0.00280048	0.00285196	0.00292006	0.00299312		7.24208	7.24217	7.2422	7.24211	7.24197	7.24171	7.24134	7.24085	7.24032		14.7589	14.759	14.7591	14.7589	14.7586	14.7581	14.7573	14.7563	14.7553
													691.5	1312.18	0.6915	1897.58	7.28933	1.48907	0.00274906	0.00273737	0.00273348	0.00274516	0.00276468	0.00280001	0.00285149	0.00291958	0.00299264		7.2693	7.26938	7.26941	7.26932	7.26918	7.26892	7.26855	7.26805	7.26752
													692	1261.91	0.692	1823.56	7.00501	1.48906	0.0027486	0.00273691	0.00273302	0.0027447	0.00276422	0.00279955	0.00285102	0.0029191	0.00299216		6.98576	6.98584	6.98587	6.98579	6.98565	6.9854	6.98504	6.98457	6.98405		14.2551	14.2552	14.2553	14.2551	14.2548	14.2543	14.2536	14.2526	14.2516
													692.5	1263.58	0.6925	1824.67	7.00925	1.48904	0.00274813	0.00273645	0.00273256	0.00274424	0.00276376	0.00279908	0.00285055	0.00291863	0.00299168		6.98998	6.99007	6.99009	6.99001	6.98988	6.98963	6.98927	6.98879	6.98828
													693	1241	0.693	1790.76	6.87902	1.48903	0.00274767	0.00273599	0.0027321	0.00274378	0.0027633	0.00279862	0.00285008	0.00291815	0.0029912		6.86012	6.8602	6.86022	6.86014	6.86001	6.85977	6.85941	6.85894	6.85844		13.8501	13.8503	13.8503	13.8502	13.8499	13.8494	13.8487	13.8477	13.8467
													693.5	1224.59	0.6935	1765.81	6.78314	1.48902	0.00274722	0.00273553	0.00273165	0.00274332	0.00276283	0.00279816	0.00284961	0.00291768	0.00299072		6.76451	6.76459	6.76461	6.76453	6.7644	6.76416	6.76381	6.76335	6.76286
													694	1231.75	0.694	1774.86	6.81791	1.489	0.00274676	0.00273508	0.00273119	0.00274286	0.00276238	0.00279769	0.00284915	0.00291721	0.00299024		6.79919	6.79927	6.79929	6.79921	6.79908	6.79884	6.79849	6.79802	6.79753		13.5637	13.5639	13.5639	13.5637	13.5635	13.563	13.5623	13.5614	13.5604
													694.5	1183.17	0.6945	1703.62	6.54427	1.48899	0.0027463	0.00273462	0.00273073	0.0027424	0.00276192	0.00279723	0.00284868	0.00291674	0.00298976		6.5263	6.52638	6.5264	6.52633	6.5262	6.52597	6.52563	6.52519	6.52471
													695	1169.43	0.695	1682.64	6.46365	1.48898	0.00274584	0.00273416	0.00273028	0.00274195	0.00276146	0.00279677	0.00284822	0.00291627	0.00298929		6.4459	6.44598	6.446	6.44593	6.4458	6.44557	6.44524	6.4448	6.44433		12.9722	12.9724	12.9724	12.9723	12.972	12.9715	12.9709	12.97	12.969
													695.5	1159.53	0.6955	1667.19	6.40433	1.48896	0.00274539	0.00273371	0.00272982	0.00274149	0.002761	0.00279631	0.00284775	0.0029158	0.00298881		6.38675	6.38683	6.38685	6.38678	6.38665	6.38642	6.3861	6.38566	6.38519
													696	1138.2	0.696	1635.35	6.282	1.48895	0.00274493	0.00273326	0.00272937	0.00274104	0.00276055	0.00279585	0.00284729	0.00291533	0.00298834		6.26476	6.26483	6.26486	6.26478	6.26466	6.26444	6.26412	6.26369	6.26323		12.6515	12.6517	12.6517	12.6516	12.6513	12.6509	12.6502	12.6493	12.6484
													696.5	1118.95	0.6965	1606.53	6.17129	1.48894	0.00274448	0.0027328	0.00272892	0.00274059	0.00276009	0.0027954	0.00284683	0.00291486	0.00298787		6.15435	6.15443	6.15445	6.15438	6.15426	6.15404	6.15372	6.1533	6.15285
													697	1114.37	0.697	1598.8	6.14162	1.48893	0.00274403	0.00273235	0.00272847	0.00274013	0.00275964	0.00279494	0.00284637	0.0029144	0.00298739		6.12477	6.12484	6.12486	6.12479	6.12467	6.12445	6.12414	6.12372	6.12327		12.2791	12.2793	12.2793	12.2792	12.2789	12.2785	12.2779	12.277	12.2761
													697.5	1095.24	0.6975	1570.24	6.03188	1.48891	0.00274358	0.0027319	0.00272802	0.00273968	0.00275919	0.00279448	0.00284591	0.00291393	0.00298692		6.01533	6.0154	6.01543	6.01536	6.01524	6.01503	6.01472	6.01431	6.01387
													698	1088.1	0.698	1558.88	5.98826	1.4889	0.00274313	0.00273145	0.00272757	0.00273923	0.00275873	0.00279403	0.00284545	0.00291347	0.00298645		5.97183	5.9719	5.97192	5.97185	5.97174	5.97153	5.97122	5.97081	5.97037		11.9872	11.9873	11.9874	11.9872	11.987	11.9866	11.9859	11.9851	11.9842
													698.5	1053.99	0.6985	1508.93	5.79638	1.48889	0.00274268	0.002731	0.00272712	0.00273878	0.00275828	0.00279358	0.00284499	0.002913	0.00298598		5.78048	5.78055	5.78057	5.7805	5.78039	5.78018	5.77989	5.77949	5.77907
													699	1039.97	0.699	1487.79	5.71519	1.48887	0.00274223	0.00273056	0.00272667	0.00273833	0.00275783	0.00279312	0.00284453	0.00291254	0.00298552		5.69951	5.69958	5.6996	5.69954	5.69942	5.69922	5.69893	5.69854	5.69812		11.48	11.4801	11.4802	11.48	11.4798	11.4794	11.4788	11.478	11.4772
													699.5	1013	0.6995	1448.18	5.56301	1.48886	0.00274178	0.00273011	0.00272622	0.00273789	0.00275738	0.00279267	0.00284408	0.00291208	0.00298505		5.54775	5.54782	5.54784	5.54778	5.54767	5.54747	5.54718	5.54681	5.5464
													700	1001.96	0.7	1431.37	5.49845	1.48885	0.00274133	0.00272966	0.00272578	0.00273744	0.00275694	0.00279222	0.00284362	0.00291162	0.00298458		5.48338	5.48344	5.48347	5.4834	5.48329	5.4831	5.48282	5.48244	5.48204		11.0311	11.0313	11.0313	11.0312	11.031	11.0306	11.03	11.0293	11.0284
													700.5	995.467	0.7005	1421.08	5.45892	1.48884	0.00274089	0.00272922	0.00272533	0.00273699	0.00275649	0.00279177	0.00284317	0.00291116	0.00298412		5.44395	5.44402	5.44404	5.44398	5.44387	5.44368	5.4434	5.44302	5.44263
													701	984.569	0.701	1404.52	5.3953	1.48882	0.00274044	0.00272877	0.00272489	0.00273655	0.00275604	0.00279132	0.00284271	0.0029107	0.00298365		5.38052	5.38058	5.3806	5.38054	5.38043	5.38024	5.37997	5.3796	5.37921		10.8245	10.8246	10.8246	10.8245	10.8243	10.8239	10.8234	10.8226	10.8218
													701.5	950	0.7015	1354.24	5.20216	1.48881	0.00274	0.00272833	0.00272445	0.00273611	0.0027556	0.00279087	0.00284226	0.00291024	0.00298319		5.18791	5.18797	5.18799	5.18793	5.18783	5.18764	5.18737	5.18702	5.18664
													702	945.067	0.702	1346.25	5.17146	1.4888	0.00273955	0.00272789	0.00272401	0.00273566	0.00275515	0.00279042	0.00284181	0.00290979	0.00298273		5.15729	5.15735	5.15737	5.15731	5.15721	5.15703	5.15676	5.15641	5.15604		10.3452	10.3453	10.3454	10.3452	10.345	10.3447	10.3441	10.3434	10.3427
													702.5	942.941	0.7025	1342.27	5.15616	1.48879	0.00273911	0.00272745	0.00272356	0.00273522	0.00275471	0.00278998	0.00284136	0.00290933	0.00298227		5.14203	5.14209	5.14211	5.14205	5.14195	5.14177	5.14151	5.14116	5.14078
													703	914.78	0.703	1301.25	4.99861	1.48877	0.00273867	0.00272701	0.00272312	0.00273478	0.00275426	0.00278953	0.00284091	0.00290887	0.0029818		4.98492	4.98498	4.985	4.98494	4.98484	4.98467	4.98441	4.98407	4.9837		10.127	10.1271	10.1271	10.127	10.1268	10.1264	10.1259	10.1252	10.1245
													703.5	907.993	0.7035	1290.68	4.958	1.48876	0.00273823	0.00272657	0.00272268	0.00273434	0.00275382	0.00278909	0.00284046	0.00290842	0.00298135		4.94442	4.94448	4.9445	4.94444	4.94435	4.94417	4.94392	4.94358	4.94322
													704	890.28	0.704	1264.6	4.85782	1.48875	0.00273779	0.00272613	0.00272225	0.0027339	0.00275338	0.00278864	0.00284001	0.00290797	0.00298089		4.84452	4.84458	4.8446	4.84454	4.84445	4.84428	4.84403	4.8437	4.84334		9.78895	9.78906	9.7891	9.78899	9.78879	9.78845	9.78794	9.78728	9.78656
													704.5	882.294	0.7045	1252.37	4.81083	1.48874	0.00273735	0.00272569	0.00272181	0.00273346	0.00275294	0.0027882	0.00283957	0.00290752	0.00298043		4.79766	4.79772	4.79774	4.79768	4.79759	4.79742	4.79717	4.79684	4.79649
													705	871.033	0.705	1235.51	4.74606	1.48872	0.00273691	0.00272525	0.00272137	0.00273302	0.0027525	0.00278776	0.00283912	0.00290706	0.00297997		4.73307	4.73313	4.73315	4.73309	4.733	4.73283	4.73259	4.73227	4.73192		9.53074	9.53085	9.53089	9.53077	9.53059	9.53025	9.52976	9.52911	9.52841
													705.5	858.327	0.7055	1216.62	4.67351	1.48871	0.00273648	0.00272482	0.00272094	0.00273259	0.00275206	0.00278732	0.00283867	0.00290661	0.00297952		4.66072	4.66078	4.6608	4.66074	4.66065	4.66049	4.66025	4.65993	4.65959
													706	858.293	0.706	1215.71	4.67002	1.4887	0.00273604	0.00272438	0.0027205	0.00273215	0.00275163	0.00278688	0.00283823	0.00290616	0.00297906		4.65724	4.6573	4.65732	4.65726	4.65717	4.65701	4.65677	4.65645	4.65611		9.31797	9.31808	9.31811	9.318	9.31782	9.31749	9.31701	9.31638	9.3157
													706.5	844	0.7065	1194.62	4.589	1.48869	0.0027356	0.00272395	0.00272007	0.00273171	0.00275119	0.00278644	0.00283779	0.00290572	0.00297861		4.57645	4.5765	4.57652	4.57646	4.57638	4.57621	4.57598	4.57567	4.57533
													707	824.78	0.707	1166.59	4.48133	1.48867	0.00273517	0.00272351	0.00271963	0.00273128	0.00275075	0.002786	0.00283734	0.00290527	0.00297815		4.46907	4.46912	4.46914	4.46909	4.469	4.46884	4.46861	4.46831	4.46798		9.04552	9.04562	9.04566	9.04555	9.04537	9.04505	9.04459	9.04397	9.04331
													707.5	814.039	0.7075	1150.59	4.41984	1.48866	0.00273474	0.00272308	0.0027192	0.00273085	0.00275032	0.00278556	0.0028369	0.00290482	0.0029777		4.40775	4.40781	4.40782	4.40777	4.40769	4.40753	4.4073	4.407	4.40668
													708	801.307	0.708	1131.79	4.34764	1.48865	0.0027343	0.00272265	0.00271877	0.00273041	0.00274989	0.00278512	0.00283646	0.00290437	0.00297725		4.33575	4.3358	4.33582	4.33577	4.33568	4.33553	4.33531	4.33501	4.33469		8.7435	8.74361	8.74364	8.74354	8.74337	8.74306	8.74261	8.74201	8.74137
													708.5	787.301	0.7085	1111.22	4.26863	1.48864	0.00273387	0.00272222	0.00271834	0.00272998	0.00274945	0.00278469	0.00283602	0.00290393	0.0029768		4.25696	4.25701	4.25703	4.25698	4.25689	4.25674	4.25652	4.25623	4.25592
													709	771.38	0.709	1087.98	4.17936	1.48862	0.00273344	0.00272179	0.00271791	0.00272955	0.00274902	0.00278425	0.00283558	0.00290349	0.00297635		4.16794	4.16799	4.168	4.16795	4.16787	4.16773	4.16751	4.16723	4.16692		8.4249	8.425	8.42503	8.42493	8.42477	8.42447	8.42404	8.42346	8.42285
													709.5	764.261	0.7095	1077.18	4.13788	1.48861	0.00273301	0.00272136	0.00271748	0.00272912	0.00274859	0.00278382	0.00283514	0.00290304	0.0029759		4.12657	4.12661	4.12663	4.12658	4.1265	4.12636	4.12614	4.12586	4.12556
													710	761	0.71	1071.83	4.11732	1.4886	0.00273258	0.00272093	0.00271705	0.00272869	0.00274816	0.00278339	0.00283471	0.0029026	0.00297545		4.10606	4.10611	4.10613	4.10608	4.106	4.10586	4.10564	4.10536	4.10506		8.23263	8.23273	8.23276	8.23266	8.2325	8.23221	8.23179	8.23123	8.23063
													710.5	758.412	0.7105	1067.43	4.10042	1.48859	0.00273215	0.0027205	0.00271662	0.00272827	0.00274773	0.00278295	0.00283427	0.00290216	0.00297501		4.08922	4.08927	4.08929	4.08924	4.08916	4.08901	4.0888	4.08852	4.08823
													711	741.953	0.711	1043.53	4.00862	1.48857	0.00273172	0.00272007	0.0027162	0.00272784	0.0027473	0.00278252	0.00283384	0.00290172	0.00297456		3.99767	3.99772	3.99773	3.99768	3.99761	3.99747	3.99726	3.99699	3.9967		8.08689	8.08698	8.08702	8.08692	8.08676	8.08648	8.08606	8.08551	8.08492
													711.5	727.68	0.7115	1022.74	3.92874	1.48856	0.0027313	0.00271965	0.00271577	0.00272741	0.00274687	0.00278209	0.0028334	0.00290128	0.00297411		3.91801	3.91805	3.91807	3.91802	3.91795	3.91781	3.91761	3.91734	3.91705
													712	721.933	0.712	1013.95	3.89498	1.48855	0.00273087	0.00271922	0.00271535	0.00272699	0.00274644	0.00278166	0.00283297	0.00290084	0.00297367		3.88434	3.88439	3.8844	3.88436	3.88428	3.88414	3.88394	3.88368	3.8834		7.80235	7.80244	7.80247	7.80238	7.80223	7.80195	7.80155	7.80102	7.80045
													712.5	701.797	0.7125	984.979	3.78368	1.48854	0.00273045	0.0027188	0.00271492	0.00272656	0.00274602	0.00278123	0.00283253	0.0029004	0.00297323		3.77335	3.7734	3.77341	3.77337	3.77329	3.77316	3.77297	3.77271	3.77243
													713	686.767	0.713	963.207	3.70005	1.48853	0.00273002	0.00271838	0.0027145	0.00272614	0.00274559	0.0027808	0.0028321	0.00289996	0.00297278		3.68995	3.68999	3.69001	3.68996	3.68989	3.68976	3.68957	3.68932	3.68905		7.4633	7.46339	7.46342	7.46333	7.46318	7.46292	7.46254	7.46203	7.46148
													713.5	679.118	0.7135	951.812	3.65628	1.48851	0.0027296	0.00271795	0.00271408	0.00272571	0.00274517	0.00278038	0.00283167	0.00289953	0.00297234		3.64629	3.64634	3.64635	3.64631	3.64624	3.64611	3.64592	3.64567	3.64541
													714	668.32	0.714	936.022	3.59562	1.4885	0.00272918	0.00271753	0.00271366	0.00272529	0.00274474	0.00277995	0.00283124	0.00289909	0.0029719		3.58581	3.58585	3.58587	3.58582	3.58575	3.58563	3.58544	3.5852	3.58494		7.2321	7.23219	7.23222	7.23213	7.23199	7.23174	7.23136	7.23087	7.23034
													714.5	659.242	0.7145	922.662	3.5443	1.48849	0.00272875	0.00271711	0.00271324	0.00272487	0.00274432	0.00277953	0.00283081	0.00289866	0.00297146		3.53463	3.53467	3.53468	3.53464	3.53457	3.53445	3.53427	3.53403	3.53377
													715	641.167	0.715	896.737	3.44471	1.48848	0.00272833	0.00271669	0.00271282	0.00272445	0.0027439	0.0027791	0.00283038	0.00289822	0.00297102		3.43531	3.43535	3.43537	3.43533	3.43526	3.43514	3.43496	3.43473	3.43448		6.96994	6.97002	6.97005	6.96997	6.96983	6.96959	6.96923	6.96875	6.96824
													715.5	631.915	0.7155	883.18	3.39263	1.48847	0.00272791	0.00271627	0.0027124	0.00272403	0.00274348	0.00277868	0.00282995	0.00289779	0.00297058		3.38338	3.38342	3.38343	3.38339	3.38333	3.38321	3.38303	3.3828	3.38255
													716	625.133	0.716	873.091	3.35388	1.48845	0.00272749	0.00271585	0.00271198	0.00272361	0.00274306	0.00277825	0.00282953	0.00289736	0.00297015		3.34473	3.34477	3.34478	3.34474	3.34468	3.34456	3.34439	3.34416	3.34392		6.72811	6.72819	6.72821	6.72814	6.728	6.72777	6.72742	6.72696	6.72647
													716.5	612.216	0.7165	854.453	3.28228	1.48844	0.00272708	0.00271544	0.00271156	0.00272319	0.00274264	0.00277783	0.0028291	0.00289693	0.00296971		3.27333	3.27337	3.27338	3.27335	3.27328	3.27317	3.273	3.27277	3.27254
													717	608.727	0.717	848.991	3.2613	1.48843	0.00272666	0.00271502	0.00271115	0.00272278	0.00274222	0.00277741	0.00282868	0.0028965	0.00296927		3.25241	3.25245	3.25246	3.25242	3.25236	3.25224	3.25208	3.25186	3.25162		6.52574	6.52582	6.52584	6.52577	6.52564	6.52541	6.52507	6.52463	6.52415
													717.5	596.046	0.7175	830.726	3.19114	1.48842	0.00272624	0.0027146	0.00271073	0.00272236	0.0027418	0.00277699	0.00282825	0.00289607	0.00296884		3.18244	3.18247	3.18249	3.18245	3.18239	3.18228	3.18211	3.1819	3.18166
													718	586.387	0.718	816.694	3.13724	1.48841	0.00272583	0.00271419	0.00271032	0.00272194	0.00274138	0.00277657	0.00282783	0.00289564	0.00296841		3.12869	3.12872	3.12874	3.1287	3.12864	3.12853	3.12837	3.12815	3.12793		6.31112	6.3112	6.31122	6.31115	6.31103	6.3108	6.31048	6.31005	6.30959
													718.5	580.085	0.7185	807.356	3.10136	1.48839	0.00272541	0.00271377	0.0027099	0.00272153	0.00274097	0.00277615	0.00282741	0.00289521	0.00296797		3.09291	3.09295	3.09296	3.09292	3.09286	3.09275	3.09259	3.09238	3.09216
													719	565.953	0.719	787.14	3.02371	1.48838	0.002725	0.00271336	0.00270949	0.00272112	0.00274055	0.00277573	0.00282698	0.00289478	0.00296754		3.01547	3.0155	3.01551	3.01548	3.01542	3.01531	3.01516	3.01495	3.01473		6.10838	6.10845	6.10847	6.1084	6.10828	6.10807	6.10775	6.10734	6.10689
													719.5	556.216	0.7195	773.059	2.96962	1.48837	0.00272458	0.00271295	0.00270908	0.0027207	0.00274014	0.00277532	0.00282656	0.00289436	0.00296711		2.96152	2.96156	2.96157	2.96154	2.96148	2.96137	2.96122	2.96102	2.9608
													720	543.533	0.72	754.907	2.89989	1.48836	0.00272417	0.00271254	0.00270867	0.00272029	0.00273972	0.0027749	0.00282614	0.00289393	0.00296668		2.89199	2.89202	2.89204	2.892	2.89194	2.89184	2.89169	2.8915	2.89129		5.85352	5.85358	5.85361	5.85354	5.85342	5.85322	5.85292	5.85252	5.85209
													720.5	537.288	0.7205	745.715	2.86458	1.48835	0.00272376	0.00271213	0.00270825	0.00271988	0.00273931	0.00277448	0.00282572	0.00289351	0.00296625		2.85678	2.85681	2.85682	2.85679	2.85673	2.85663	2.85648	2.85629	2.85608
													721	532.373	0.721	738.382	2.83641	1.48834	0.00272335	0.00271172	0.00270784	0.00271947	0.0027389	0.00277407	0.0028253	0.00289309	0.00296582		2.82868	2.82872	2.82873	2.8287	2.82864	2.82854	2.8284	2.8282	2.828		5.68546	5.68553	5.68555	5.68548	5.68537	5.68517	5.68488	5.68449	5.68408
													721.5	518.059	0.7215	718.03	2.75823	1.48832	0.00272294	0.00271131	0.00270744	0.00271906	0.00273849	0.00277365	0.00282489	0.00289266	0.00296539		2.75072	2.75075	2.75076	2.75073	2.75068	2.75058	2.75044	2.75025	2.75005
													722	503.24	0.722	697.008	2.67748	1.48831	0.00272253	0.0027109	0.00270703	0.00271865	0.00273808	0.00277324	0.00282447	0.00289224	0.00296496		2.67019	2.67022	2.67023	2.6702	2.67015	2.67005	2.66991	2.66973	2.66954		5.42091	5.42097	5.42099	5.42093	5.42082	5.42063	5.42035	5.41999	5.41959
													722.5	496.137	0.7225	686.695	2.63786	1.4883	0.00272212	0.00271049	0.00270662	0.00271824	0.00273767	0.00277283	0.00282405	0.00289182	0.00296454		2.63068	2.63071	2.63072	2.63069	2.63064	2.63055	2.63041	2.63023	2.63004
													723	483.24	0.723	668.382	2.56751	1.48829	0.00272171	0.00271008	0.00270621	0.00271783	0.00273726	0.00277242	0.00282364	0.0028914	0.00296411		2.56052	2.56055	2.56056	2.56053	2.56048	2.56039	2.56026	2.56009	2.5599		5.1912	5.19126	5.19128	5.19122	5.19112	5.19094	5.19067	5.19032	5.18994
													723.5	481.556	0.7235	665.592	2.55679	1.48828	0.0027213	0.00270968	0.00270581	0.00271743	0.00273685	0.00277201	0.00282322	0.00289098	0.00296369		2.54984	2.54987	2.54988	2.54985	2.5498	2.54971	2.54958	2.5494	2.54922
													724	472.32	0.724	652.376	2.50603	1.48827	0.0027209	0.00270927	0.0027054	0.00271702	0.00273644	0.0027716	0.00282281	0.00289056	0.00296326		2.49921	2.49924	2.49925	2.49922	2.49917	2.49908	2.49895	2.49878	2.4986		5.04904	5.0491	5.04912	5.04906	5.04896	5.04879	5.04853	5.04818	5.04782
													724.5	470.261	0.7245	649.084	2.49338	1.48825	0.00272049	0.00270887	0.002705	0.00271661	0.00273604	0.00277119	0.0028224	0.00289014	0.00296284		2.4866	2.48663	2.48664	2.48661	2.48656	2.48647	2.48634	2.48618	2.48599
													725	470.967	0.725	649.609	2.4954	1.48824	0.00272009	0.00270846	0.00270459	0.00271621	0.00273563	0.00277078	0.00282198	0.00288973	0.00296242		2.48861	2.48864	2.48865	2.48862	2.48857	2.48848	2.48836	2.48819	2.48801		4.97521	4.97527	4.97529	4.97523	4.97513	4.97496	4.9747	4.97436	4.974
													725.5	457.667	0.7255	630.829	2.42326	1.48823	0.00271968	0.00270806	0.00270419	0.00271581	0.00273523	0.00277037	0.00282157	0.00288931	0.002962		2.41667	2.4167	2.41671	2.41668	2.41663	2.41655	2.41642	2.41626	2.41608
													726	458.413	0.726	631.423	2.42554	1.48822	0.00271928	0.00270766	0.00270379	0.0027154	0.00273482	0.00276996	0.00282116	0.00288889	0.00296158		2.41894	2.41897	2.41898	2.41895	2.41891	2.41882	2.4187	2.41853	2.41836		4.83561	4.83567	4.83569	4.83563	4.83554	4.83537	4.83512	4.83479	4.83444
													726.5	456.307	0.7265	628.09	2.41273	1.48821	0.00271888	0.00270726	0.00270339	0.002715	0.00273442	0.00276956	0.00282075	0.00288848	0.00296116		2.40617	2.4062	2.40621	2.40618	2.40614	2.40605	2.40593	2.40577	2.40559
													727	443.413	0.727	609.922	2.34295	1.4882	0.00271848	0.00270686	0.00270299	0.0027146	0.00273401	0.00276915	0.00282034	0.00288807	0.00296074		2.33658	2.3366	2.33661	2.33659	2.33654	2.33646	2.33634	2.33618	2.33601		4.74275	4.74281	4.74282	4.74277	4.74268	4.74251	4.74227	4.74194	4.7416
													727.5	437.255	0.7275	601.038	2.30882	1.48818	0.00271808	0.00270646	0.00270259	0.0027142	0.00273361	0.00276875	0.00281994	0.00288765	0.00296032		2.30254	2.30257	2.30258	2.30255	2.30251	2.30242	2.30231	2.30215	2.30198
													728	433.84	0.728	595.934	2.28921	1.48817	0.00271768	0.00270606	0.00270219	0.0027138	0.00273321	0.00276834	0.00281953	0.00288724	0.0029599		2.28299	2.28302	2.28303	2.283	2.28296	2.28287	2.28276	2.2826	2.28244		4.58553	4.58559	4.5856	4.58555	4.58546	4.5853	4.58506	4.58475	4.58442
													728.5	417.137	0.7285	572.598	2.19957	1.48816	0.00271728	0.00270566	0.00270179	0.0027134	0.00273281	0.00276794	0.00281912	0.00288683	0.00295949		2.19359	2.19362	2.19362	2.1936	2.19356	2.19348	2.19337	2.19322	2.19306
													729	408.087	0.729	559.79	2.15037	1.48815	0.00271688	0.00270526	0.00270139	0.002713	0.00273241	0.00276754	0.00281872	0.00288642	0.00295907		2.14453	2.14455	2.14456	2.14453	2.14449	2.14442	2.14431	2.14416	2.144		4.33812	4.33817	4.33818	4.33813	4.33805	4.3379	4.33767	4.33738	4.33706
													729.5	414.222	0.7295	567.817	2.1812	1.48814	0.00271648	0.00270486	0.002701	0.00271261	0.00273201	0.00276714	0.00281831	0.00288601	0.00295866		2.17528	2.1753	2.17531	2.17529	2.17524	2.17517	2.17505	2.17491	2.17475
													730	402.6	0.73	551.507	2.11855	1.48813	0.00271608	0.00270447	0.0027006	0.00271221	0.00273162	0.00276674	0.00281791	0.0028856	0.00295824		2.1128	2.11282	2.11283	2.1128	2.11276	2.11269	2.11258	2.11244	2.11228		4.28807	4.28812	4.28814	4.28809	4.28801	4.28786	4.28764	4.28734	4.28703
													730.5	391.667	0.7305	536.162	2.05961	1.48812	0.00271569	0.00270407	0.00270021	0.00271181	0.00273122	0.00276634	0.0028175	0.00288519	0.00295783		2.05401	2.05404	2.05405	2.05402	2.05398	2.05391	2.0538	2.05366	2.05351
													731	390.827	0.731	534.647	2.05378	1.4881	0.00271529	0.00270368	0.00269981	0.00271142	0.00273082	0.00276594	0.0028171	0.00288478	0.00295742		2.04821	2.04823	2.04824	2.04821	2.04818	2.0481	2.048	2.04786	2.04771		4.10222	4.10227	4.10228	4.10224	4.10216	4.10201	4.1018	4.10152	4.10122
													731.5	387.059	0.7315	529.13	2.03259	1.48809	0.0027149	0.00270328	0.00269942	0.00271102	0.00273043	0.00276554	0.0028167	0.00288438	0.002957		2.02707	2.0271	2.02711	2.02708	2.02704	2.02697	2.02687	2.02673	2.02658
													732	383.813	0.732	524.335	2.01417	1.48808	0.0027145	0.00270289	0.00269903	0.00271063	0.00273003	0.00276514	0.0028163	0.00288397	0.00295659		2.00871	2.00873	2.00874	2.00871	2.00867	2.0086	2.0085	2.00836	2.00822		4.03578	4.03583	4.03584	4.0358	4.03572	4.03558	4.03537	4.03509	4.0348
													732.5	366.641	0.7325	500.533	1.92274	1.48807	0.00271411	0.0027025	0.00269863	0.00271024	0.00272964	0.00276475	0.0028159	0.00288357	0.00295618		1.91752	1.91754	1.91755	1.91753	1.91749	1.91742	1.91733	1.9172	1.91706
													733	371.38	0.733	506.658	1.94627	1.48806	0.00271372	0.00270211	0.00269824	0.00270985	0.00272924	0.00276435	0.0028155	0.00288316	0.00295577		1.94099	1.94101	1.94102	1.94099	1.94096	1.94089	1.94079	1.94066	1.94051		3.85851	3.85855	3.85857	3.85852	3.85845	3.85831	3.85811	3.85785	3.85757
													733.5	358.111	0.7335	488.222	1.87545	1.48805	0.00271333	0.00270172	0.00269785	0.00270945	0.00272885	0.00276396	0.0028151	0.00288276	0.00295536		1.87036	1.87038	1.87039	1.87037	1.87033	1.87027	1.87017	1.87004	1.86991
													734	361.72	0.734	492.807	1.89306	1.48804	0.00271294	0.00270133	0.00269746	0.00270906	0.00272846	0.00276356	0.0028147	0.00288236	0.00295496		1.88792	1.88795	1.88795	1.88793	1.88789	1.88783	1.88773	1.8876	1.88747		3.75829	3.75833	3.75834	3.7583	3.75823	3.75809	3.7579	3.75765	3.75737
													734.5	350.216	0.7345	476.808	1.8316	1.48803	0.00271255	0.00270094	0.00269707	0.00270867	0.00272807	0.00276317	0.0028143	0.00288195	0.00295455		1.82664	1.82666	1.82666	1.82664	1.82661	1.82654	1.82645	1.82633	1.82619
													735	335	0.735	455.782	1.75084	1.48801	0.00271216	0.00270055	0.00269669	0.00270828	0.00272768	0.00276277	0.00281391	0.00288155	0.00295414		1.74609	1.74611	1.74611	1.74609	1.74606	1.746	1.74591	1.74579	1.74566		3.57272	3.57276	3.57278	3.57274	3.57267	3.57254	3.57236	3.57212	3.57186
													735.5	342.209	0.7355	465.274	1.7873	1.488	0.00271177	0.00270016	0.0026963	0.0027079	0.00272729	0.00276238	0.00281351	0.00288115	0.00295374		1.78245	1.78247	1.78248	1.78246	1.78242	1.78236	1.78227	1.78215	1.78202
													736	351.68	0.736	477.826	1.83551	1.48799	0.00271138	0.00269977	0.00269591	0.00270751	0.0027269	0.00276199	0.00281312	0.00288075	0.00295333		1.83054	1.83056	1.83057	1.83054	1.83051	1.83044	1.83035	1.83023	1.83009		3.61299	3.61303	3.61304	3.613	3.61293	3.6128	3.61262	3.61237	3.61211
													736.5	332.144	0.7365	450.976	1.73237	1.48798	0.00271099	0.00269939	0.00269553	0.00270712	0.00272651	0.0027616	0.00281272	0.00288035	0.00295293		1.72768	1.7277	1.7277	1.72768	1.72765	1.72759	1.7275	1.72738	1.72726
													737	326.686	0.737	443.265	1.70275	1.48797	0.00271061	0.002699	0.00269514	0.00270674	0.00272612	0.00276121	0.00281233	0.00287996	0.00295253		1.69814	1.69816	1.69816	1.69814	1.69811	1.69805	1.69796	1.69785	1.69772		3.42581	3.42585	3.42586	3.42583	3.42576	3.42564	3.42546	3.42523	3.42498
													737.5	336.533	0.7375	456.316	1.75289	1.48796	0.00271022	0.00269862	0.00269476	0.00270635	0.00272574	0.00276082	0.00281194	0.00287956	0.00295212		1.74814	1.74816	1.74816	1.74814	1.74811	1.74805	1.74796	1.74784	1.74771
													738	310.183	0.738	420.302	1.61454	1.48795	0.00270984	0.00269823	0.00269437	0.00270597	0.00272535	0.00276043	0.00281154	0.00287916	0.00295172		1.61017	1.61019	1.61019	1.61017	1.61014	1.61009	1.61	1.60989	1.60978		3.3583	3.35834	3.35836	3.35832	3.35825	3.35813	3.35796	3.35773	3.35749
													738.5	330.427	0.7385	447.429	1.71875	1.48794	0.00270945	0.00269785	0.00269399	0.00270558	0.00272496	0.00276004	0.00281115	0.00287877	0.00295132		1.71409	1.71411	1.71412	1.7141	1.71407	1.71401	1.71392	1.7138	1.71368
													739	302.196	0.739	408.926	1.57084	1.48793	0.00270907	0.00269747	0.00269361	0.0027052	0.00272458	0.00275966	0.00281076	0.00287837	0.00295092		1.56659	1.5666	1.56661	1.56659	1.56656	1.56651	1.56643	1.56632	1.56621		3.28068	3.28072	3.28073	3.28069	3.28063	3.28051	3.28034	3.28012	3.27988
													739.5	295.333	0.7395	399.369	1.53413	1.48792	0.00270869	0.00269709	0.00269322	0.00270482	0.0027242	0.00275927	0.00281037	0.00287798	0.00295052		1.52997	1.52999	1.53	1.52998	1.52995	1.5299	1.52982	1.52971	1.5296
													740	315.333	0.74	426.126	1.63691	1.4879	0.0027083	0.0026967	0.00269284	0.00270443	0.00272381	0.00275889	0.00280998	0.00287758	0.00295012		1.63248	1.6325	1.63251	1.63249	1.63246	1.6324	1.63231	1.6322	1.63209		3.16246	3.16249	3.1625	3.16247	3.16241	3.16229	3.16213	3.16192	3.16169
													740.5	292.784	0.7405	395.387	1.51883	1.48789	0.00270792	0.00269632	0.00269246	0.00270405	0.00272343	0.0027585	0.00280959	0.00287719	0.00294973		1.51472	1.51474	1.51475	1.51473	1.5147	1.51465	1.51457	1.51446	1.51435
													741	294.293	0.741	397.157	1.52563	1.48788	0.00270754	0.00269594	0.00269208	0.00270367	0.00272305	0.00275812	0.00280921	0.0028768	0.00294933		1.5215	1.52152	1.52153	1.52151	1.52148	1.52142	1.52135	1.52124	1.52113		3.03622	3.03626	3.03627	3.03624	3.03618	3.03607	3.03591	3.03571	3.03549
													741.5	293.693	0.7415	396.079	1.52149	1.48787	0.00270716	0.00269556	0.00269171	0.00270329	0.00272267	0.00275773	0.00280882	0.00287641	0.00294893		1.51737	1.51739	1.5174	1.51738	1.51735	1.5173	1.51722	1.51712	1.51701
													742	278.307	0.742	375.076	1.44081	1.48786	0.00270678	0.00269519	0.00269133	0.00270291	0.00272229	0.00275735	0.00280843	0.00287601	0.00294854		1.43691	1.43693	1.43694	1.43692	1.43689	1.43684	1.43677	1.43667	1.43656		2.95429	2.95432	2.95433	2.9543	2.95424	2.95414	2.95399	2.95379	2.95357
													742.5	279.863	0.7425	376.92	1.44789	1.48785	0.0027064	0.00269481	0.00269095	0.00270254	0.00272191	0.00275697	0.00280805	0.00287562	0.00294814		1.44397	1.44399	1.444	1.44398	1.44395	1.4439	1.44383	1.44373	1.44362
													743	267.78	0.743	360.404	1.38445	1.48784	0.00270603	0.00269443	0.00269057	0.00270216	0.00272153	0.00275659	0.00280766	0.00287524	0.00294775		1.3807	1.38072	1.38072	1.38071	1.38068	1.38063	1.38056	1.38047	1.38037		2.82468	2.82471	2.82472	2.82469	2.82463	2.82453	2.82439	2.8242	2.82399
													743.5	264.85	0.7435	356.22	1.36838	1.48783	0.00270565	0.00269406	0.0026902	0.00270178	0.00272115	0.00275621	0.00280728	0.00287485	0.00294735		1.36468	1.36469	1.3647	1.36468	1.36466	1.36461	1.36454	1.36444	1.36435
													744	260.987	0.744	350.789	1.34751	1.48782	0.00270527	0.00269368	0.00268982	0.00270141	0.00272077	0.00275583	0.0028069	0.00287446	0.00294696		1.34387	1.34388	1.34389	1.34387	1.34385	1.3438	1.34373	1.34364	1.34354		2.70855	2.70858	2.70859	2.70856	2.7085	2.70841	2.70827	2.70809	2.70789
													744.5	258.562	0.7445	347.296	1.3341	1.48781	0.0027049	0.00269331	0.00268945	0.00270103	0.0027204	0.00275545	0.00280651	0.00287407	0.00294657		1.33049	1.33051	1.33051	1.3305	1.33047	1.33042	1.33035	1.33026	1.33017
													745	251.133	0.745	337.092	1.2949	1.4878	0.00270452	0.00269293	0.00268907	0.00270066	0.00272002	0.00275507	0.00280613	0.00287369	0.00294618		1.2914	1.29141	1.29142	1.2914	1.29138	1.29133	1.29127	1.29118	1.29108		2.62189	2.62192	2.62193	2.6219	2.62185	2.62175	2.62162	2.62144	2.62125
													745.5	251.51	0.7455	337.371	1.29597	1.48779	0.00270415	0.00269256	0.0026887	0.00270028	0.00271965	0.00275469	0.00280575	0.0028733	0.00294579		1.29247	1.29248	1.29249	1.29247	1.29245	1.2924	1.29233	1.29225	1.29215
													746	252.242	0.746	338.126	1.29887	1.48777	0.00270378	0.00269219	0.00268833	0.00269991	0.00271927	0.00275432	0.00280537	0.00287292	0.0029454		1.29536	1.29537	1.29538	1.29536	1.29534	1.29529	1.29523	1.29514	1.29505		2.58783	2.58786	2.58787	2.58784	2.58779	2.58769	2.58756	2.58739	2.5872
													746.5	239.72	0.7465	321.125	1.23357	1.48776	0.0027034	0.00269181	0.00268796	0.00269954	0.0027189	0.00275394	0.00280499	0.00287253	0.00294501		1.23023	1.23025	1.23025	1.23024	1.23021	1.23017	1.23011	1.23002	1.22993
													747	240.477	0.747	321.924	1.23663	1.48775	0.00270303	0.00269144	0.00268759	0.00269917	0.00271852	0.00275356	0.00280461	0.00287215	0.00294462		1.23329	1.23331	1.23331	1.2333	1.23327	1.23323	1.23317	1.23308	1.23299		2.46352	2.46355	2.46356	2.46353	2.46348	2.4634	2.46327	2.4631	2.46293
													747.5	242.68	0.7475	324.656	1.24713	1.48774	0.00270266	0.00269107	0.00268722	0.00269879	0.00271815	0.00275319	0.00280423	0.00287177	0.00294423		1.24376	1.24377	1.24378	1.24376	1.24374	1.24369	1.24363	1.24355	1.24345
													748	239.157	0.748	319.728	1.2282	1.48773	0.00270229	0.0026907	0.00268685	0.00269842	0.00271778	0.00275282	0.00280386	0.00287138	0.00294385		1.22488	1.2249	1.2249	1.22489	1.22486	1.22482	1.22476	1.22467	1.22458		2.46864	2.46867	2.46868	2.46865	2.4686	2.46851	2.46839	2.46822	2.46804
													748.5	235.327	0.7485	314.398	1.20772	1.48772	0.00270192	0.00269033	0.00268648	0.00269805	0.00271741	0.00275244	0.00280348	0.002871	0.00294346		1.20446	1.20447	1.20448	1.20446	1.20444	1.2044	1.20434	1.20426	1.20417
													749	233.863	0.749	312.233	1.19941	1.48771	0.00270155	0.00268996	0.00268611	0.00269769	0.00271704	0.00275207	0.0028031	0.00287062	0.00294308		1.19617	1.19618	1.19619	1.19617	1.19615	1.19611	1.19605	1.19597	1.19588		2.40063	2.40066	2.40066	2.40064	2.40059	2.40051	2.40038	2.40022	2.40005
													749.5	215.533	0.7495	287.569	1.10467	1.4877	0.00270118	0.0026896	0.00268574	0.00269732	0.00271667	0.0027517	0.00280273	0.00287024	0.00294269		1.10168	1.10169	1.1017	1.10169	1.10166	1.10163	1.10157	1.10149	1.10141
													750	221.98	0.75	295.974	1.13695	1.48769	0.00270081	0.00268923	0.00268537	0.00269695	0.0027163	0.00275133	0.00280235	0.00286986	0.00294231		1.13388	1.13389	1.1339	1.13388	1.13386	1.13382	1.13376	1.13369	1.1336		2.23556	2.23559	2.23559	2.23557	2.23553	2.23545	2.23533	2.23518	2.23502
													Sum:	6.20297e+06		1.20139e+07	46150	uW									Net pwr mW		46009.5	46010.1	46010.2	46009.7	46008.7	46007	46004.5	46001.2	45997.7
																46150000	nW
																3.84138	nw/count										Average		46006.5
																											STDEV		4.47998
																											change from 11 to 64% methanol				-0.0256746	percent
[truncated: 9 more columns]

## Sheet: Absorption
			Mole and Volume Fraction Methanol										Mole and Volume Fraction Methanol										Mole and Volume fraction Methanol
			0.4396	0.3937	0.3438	0.296	0.2516	0.2042	0.1532	0.1016	0.0545		0.4396	0.3937	0.3438	0.296	0.2516	0.2042	0.1532	0.1016	0.0545		0.4396	0.3937	0.3438	0.296	0.2516	0.2042	0.1532	0.1016	0.0545
			0.637254	0.592537	0.539876	0.484962	0.429511	0.364937	0.288338	0.202084	0.114329		0.637254	0.592537	0.539876	0.484962	0.429511	0.364937	0.288338	0.202084	0.114329		0.637254	0.592537	0.539876	0.484962	0.429511	0.364937	0.288338	0.202084	0.114329
Wavelength nm	Water	Methanol	Mole fraction weighted extinction										Power Entering Cell in Microwatts										Absorbed power, microwatts
351	0.00988339	0.0145775	0.0119469	0.0117315	0.0114972	0.0112728	0.0110644	0.0108419	0.0106025	0.0103603	0.0101392		0.613994	0.614002	0.614005	0.613997	0.613983	0.613958	0.613921	0.613873	0.613821		0.00219666	0.00215714	0.00211416	0.00207294	0.00203463	0.0019937	0.00194963	0.00190501	0.00186426
352	0.0097666	0.0144842	0.0118405	0.0116239	0.0113885	0.011163	0.0109536	0.0107299	0.0104893	0.0102459	0.0100237		0.813964	0.813975	0.813979	0.813968	0.81395	0.813916	0.813868	0.813804	0.813736		0.00288618	0.00283353	0.00277626	0.00272134	0.0026703	0.00261577	0.00255706	0.00249761	0.00244332
353	0.00966968	0.0143718	0.0117367	0.0115209	0.0112863	0.0110615	0.0108527	0.0106299	0.01039	0.0101474	0.00992595		0.67492	0.674929	0.674932	0.674923	0.674907	0.67488	0.67484	0.674787	0.67473		0.00237223	0.00232871	0.00228137	0.00223599	0.0021938	0.00214873	0.00210021	0.00205108	0.00200621
354	0.00963577	0.0142612	0.0116691	0.0114568	0.011226	0.0110049	0.0107995	0.0105803	0.0103444	0.0101057	0.00988786		0.667192	0.667201	0.667204	0.667195	0.66718	0.667152	0.667113	0.66706	0.667004		0.00233158	0.00228926	0.00224323	0.00219909	0.00215807	0.00211424	0.00206705	0.00201927	0.00197564
355	0.00954518	0.0141092	0.0115515	0.011342	0.0111143	0.0108961	0.0106935	0.0104772	0.0102444	0.0100089	0.00979392		0.634592	0.6346	0.634603	0.634595	0.63458	0.634554	0.634517	0.634467	0.634414		0.00219535	0.00215563	0.00211243	0.002071	0.0020325	0.00199137	0.00194708	0.00190224	0.00186128
356	0.00956696	0.014024	0.0115263	0.0113217	0.0110993	0.0108863	0.0106884	0.0104771	0.0102498	0.0100198	0.00980987		0.681691	0.6817	0.681703	0.681694	0.681678	0.681651	0.68161	0.681557	0.6815		0.00235314	0.00231148	0.00226615	0.0022227	0.00218231	0.00213915	0.00209269	0.00204564	0.00200268
357	0.00945979	0.0138995	0.0114115	0.0112077	0.0109862	0.0107739	0.0105768	0.0103664	0.0101399	0.00991086	0.00970175		0.733417	0.733427	0.73343	0.73342	0.733404	0.733374	0.73333	0.733273	0.733211		0.00250652	0.00246187	0.00241329	0.00236672	0.00232343	0.00227719	0.00222739	0.00217697	0.00213093
358	0.00948174	0.0139786	0.0114586	0.0112522	0.0110278	0.0108128	0.0106132	0.0104	0.0101707	0.00993862	0.00972682		0.658019	0.658028	0.65803	0.658022	0.658007	0.65798	0.657941	0.657889	0.657834		0.0022581	0.00221753	0.00217339	0.00213106	0.00209173	0.0020497	0.00200445	0.00195863	0.00191679
359	0.00946653	0.0140513	0.011482	0.0112716	0.0110428	0.0108236	0.0106201	0.0104027	0.0101689	0.00993234	0.0097164		0.64681	0.646818	0.646821	0.646813	0.646798	0.646772	0.646733	0.646683	0.646628		0.00222417	0.0021835	0.00213927	0.00209685	0.00205743	0.00201531	0.00196997	0.00192405	0.00188213
360	0.009342	0.0140244	0.0114004	0.0111855	0.0109518	0.010728	0.0105201	0.0102981	0.0100593	0.00981773	0.00959719		0.782426	0.782437	0.78244	0.78243	0.782412	0.78238	0.782334	0.782273	0.782207		0.00267142	0.00262117	0.00256652	0.00251412	0.00246542	0.00241339	0.00235737	0.00230065	0.00224886
361	0.0093075	0.0139368	0.0113426	0.0111301	0.0108991	0.0106778	0.0104722	0.0102528	0.0100167	0.00977784	0.0095598		0.81946	0.819471	0.819475	0.819464	0.819445	0.819412	0.819363	0.819299	0.819231		0.00278369	0.00273167	0.00267508	0.00262082	0.00257039	0.00251651	0.0024585	0.00239977	0.00234614
362	0.00916709	0.0137421	0.0111783	0.0109683	0.01074	0.0105213	0.0103182	0.0101013	0.00986798	0.00963191	0.00941642		0.816577	0.816588	0.816592	0.816581	0.816563	0.816529	0.816481	0.816417	0.816349		0.00273379	0.00268255	0.00262682	0.00257338	0.00252372	0.00247066	0.00241353	0.00235569	0.00230287
363	0.00926198	0.0137555	0.0112373	0.0110311	0.0108069	0.0105921	0.0103926	0.0101796	0.00995039	0.00971853	0.00950688		0.784428	0.784439	0.784443	0.784432	0.784414	0.784383	0.784336	0.784275	0.784209		0.00264001	0.00259167	0.00253909	0.00248867	0.00244181	0.00239175	0.00233784	0.00228327	0.00223343
364	0.00933127	0.0137113	0.0112567	0.0110557	0.0108371	0.0106278	0.0104333	0.0102257	0.0100023	0.00977628	0.00956998		0.928908	0.92892	0.928924	0.928912	0.928891	0.928853	0.928799	0.928726	0.928648		0.00313165	0.00307586	0.00301516	0.00295696	0.00290287	0.00284508	0.00278286	0.00271986	0.00266232
365	0.00934678	0.0136275	0.0112286	0.0110321	0.0108185	0.0106139	0.0104238	0.0102209	0.0100026	0.0097817	0.00958008		0.951379	0.951392	0.951396	0.951383	0.951362	0.951323	0.951267	0.951193	0.951114		0.0031994	0.00314355	0.00308279	0.00302454	0.0029704	0.00291255	0.00285026	0.00278719	0.0027296
366	0.00922069	0.0135042	0.0111037	0.0109071	0.0106934	0.0104886	0.0102984	0.0100954	0.00987692	0.00965589	0.00945414		0.846099	0.84611	0.846114	0.846102	0.846083	0.846049	0.845999	0.845933	0.845863		0.00281376	0.00276406	0.00270999	0.00265815	0.00260996	0.00255848	0.00250305	0.00244693	0.00239567
367	0.00891964	0.0130153	0.0107201	0.0105321	0.0103277	0.0101319	0.0099501	0.00975597	0.00954709	0.00933575	0.00914285		0.873635	0.873647	0.873651	0.873639	0.87362	0.873584	0.873533	0.873465	0.873392		0.00280512	0.00275604	0.00270266	0.00265147	0.00260389	0.00255306	0.00249833	0.00244291	0.0023923
368	0.00888683	0.0129453	0.010671	0.0104847	0.0102821	0.0100881	0.00990795	0.00971558	0.00950859	0.00929918	0.00910802		0.920646	0.920658	0.920662	0.92065	0.92063	0.920592	0.920538	0.920466	0.92039		0.00294254	0.00289129	0.00283554	0.00278208	0.0027324	0.00267932	0.00262216	0.00256429	0.00251144
369	0.0088008	0.0128772	0.0105928	0.0104057	0.0102023	0.0100074	0.00982642	0.0096332	0.0094253	0.00921496	0.00902296		0.937206	0.937218	0.937223	0.93721	0.937189	0.937151	0.937096	0.937023	0.936945		0.00297356	0.00292115	0.00286415	0.00280949	0.00275869	0.00270442	0.00264598	0.00258681	0.00253278
370	0.00886022	0.0130293	0.0106929	0.0105016	0.0102935	0.0100943	0.00990916	0.00971155	0.00949892	0.0092838	0.00908744		0.985168	0.985182	0.985186	0.985173	0.985151	0.985111	0.985053	0.984976	0.984894		0.00315524	0.00309891	0.00303763	0.00297887	0.00292426	0.00286591	0.00280309	0.00273948	0.00268139
371	0.00892044	0.0130902	0.0107535	0.0105621	0.010354	0.0101547	0.00996955	0.00977191	0.00955925	0.00934409	0.00914769		0.856899	0.856911	0.856915	0.856903	0.856884	0.856849	0.856799	0.856732	0.856661		0.00275994	0.00271093	0.00265762	0.0026065	0.002559	0.00250824	0.00245359	0.00239825	0.00234772
372	0.00879619	0.0131916	0.0107284	0.0105267	0.0103073	0.0100972	0.00990207	0.00969373	0.00946956	0.00924276	0.00903573		1.0245	1.02452	1.02452	1.02451	1.02449	1.02444	1.02438	1.0243	1.02422		0.00329209	0.00323032	0.00316313	0.00309871	0.00303884	0.00297488	0.00290601	0.00283629	0.00277261
373	0.00867923	0.0131313	0.0106364	0.010432	0.0102098	0.00999704	0.00979937	0.00958834	0.00936128	0.00913156	0.00892186		0.917324	0.917336	0.91734	0.917328	0.917308	0.917271	0.917217	0.917146	0.917069		0.00292243	0.00286641	0.00280547	0.00274705	0.00269275	0.00263474	0.00257228	0.00250905	0.00245131
374	0.00871941	0.0129547	0.0105812	0.0103868	0.0101755	0.00997304	0.009785	0.00958425	0.00936825	0.00914971	0.00895023		1.024	1.02402	1.02402	1.02401	1.02399	1.02395	1.02388	1.02381	1.02372		0.00324541	0.00318592	0.00312121	0.00305917	0.0030015	0.00293989	0.00287356	0.0028064	0.00274507
375	0.00868607	0.0130179	0.0105903	0.0103915	0.0101753	0.00996828	0.00977595	0.00957062	0.0093497	0.00912618	0.00892215		1.12671	1.12672	1.12673	1.12671	1.12669	1.12664	1.12657	1.12649	1.12639		0.00357398	0.00350703	0.0034342	0.00336438	0.00329949	0.00323016	0.00315551	0.00307994	0.00301092
376	0.00862865	0.0128857	0.0105001	0.0103047	0.0100922	0.00988875	0.00969973	0.00949795	0.00928084	0.00906117	0.00886066		1.02894	1.02895	1.02895	1.02894	1.02892	1.02888	1.02882	1.02874	1.02865		0.00323607	0.00317598	0.00311062	0.00304795	0.00298971	0.00292749	0.0028605	0.00279267	0.00273073
377	0.00860562	0.012915	0.0105	0.0103022	0.0100872	0.00988118	0.00968985	0.00948559	0.00926581	0.00904345	0.00884048		1.05047	1.05048	1.05049	1.05047	1.05045	1.05041	1.05035	1.05027	1.05018		0.00330377	0.00324168	0.00317413	0.00310937	0.00304918	0.00298487	0.00291564	0.00284554	0.00278153
378	0.00861998	0.0128948	0.0104992	0.010303	0.0100897	0.00988532	0.00969552	0.00949289	0.00927488	0.0090543	0.00885296		1.08626	1.08627	1.08627	1.08626	1.08624	1.08619	1.08613	1.08605	1.08596		0.00341605	0.00335236	0.00328307	0.00321664	0.0031549	0.00308893	0.00301791	0.00294601	0.00288035
379	0.00848959	0.01282	0.0103932	0.0101945	0.00997837	0.00977138	0.00957911	0.00937385	0.009153	0.00892956	0.0087256		1.36552	1.36554	1.36555	1.36553	1.3655	1.36544	1.36536	1.36526	1.36515		0.00425103	0.00416991	0.00408167	0.00399707	0.00391845	0.00383445	0.00374401	0.00365245	0.00356884
380	0.0085709	0.0128961	0.0104723	0.0102737	0.0100579	0.00985116	0.00965912	0.00945411	0.00923352	0.00901034	0.00880662		1.27274	1.27276	1.27277	1.27275	1.27272	1.27267	1.2726	1.2725	1.27239		0.00399228	0.00391677	0.00383462	0.00375587	0.00368268	0.00360448	0.00352029	0.00343505	0.00335721
381	0.00854364	0.0128551	0.0104389	0.010241	0.0100259	0.00981982	0.00962839	0.00942403	0.00920415	0.00898168	0.00877861		1.25242	1.25243	1.25244	1.25242	1.25239	1.25234	1.25227	1.25217	1.25207		0.00391603	0.00384196	0.00376139	0.00368414	0.00361234	0.00353564	0.00345306	0.00336945	0.00329309
382	0.00849543	0.0127904	0.0103835	0.0101863	0.00997203	0.00976673	0.00957604	0.00937246	0.00915341	0.0089318	0.0087295		1.36326	1.36327	1.36328	1.36326	1.36323	1.36318	1.3631	1.36299	1.36288		0.00424	0.00415968	0.00407231	0.00398854	0.00391069	0.00382751	0.00373797	0.0036473	0.00356451
383	0.00839341	0.0128059	0.0103331	0.0101306	0.00991042	0.0096995	0.00950359	0.00929444	0.0090694	0.00884172	0.00863389		1.51591	1.51593	1.51593	1.51591	1.51588	1.51582	1.51573	1.51561	1.51549		0.00469194	0.00460018	0.00450037	0.00440467	0.00431573	0.00422072	0.00411842	0.00401486	0.00392029
384	0.00847919	0.0126417	0.010309	0.010118	0.00991027	0.0097113	0.00952648	0.00932918	0.00911689	0.0089021	0.00870604		1.58041	1.58043	1.58044	1.58042	1.58039	1.58032	1.58023	1.58011	1.57998		0.00488022	0.00478997	0.0046918	0.00459768	0.00451021	0.00441675	0.00431613	0.00421426	0.00412122
385	0.00831491	0.0127498	0.0102645	0.0100609	0.00983964	0.00962765	0.00943074	0.00922052	0.00899434	0.0087655	0.00855661		1.54636	1.54638	1.54639	1.54637	1.54634	1.54627	1.54618	1.54606	1.54594		0.00475447	0.00466038	0.00455805	0.00445993	0.00436874	0.00427132	0.00416645	0.00406027	0.00396331
386	0.00845625	0.0126054	0.0102802	0.0100898	0.00988273	0.0096844	0.00950018	0.00930351	0.0090919	0.00887781	0.00868238		1.53349	1.53351	1.53352	1.5335	1.53347	1.5334	1.53332	1.5332	1.53307		0.00472211	0.00463482	0.00453988	0.00444884	0.00436424	0.00427385	0.00417653	0.004078	0.00398802
387	0.00828842	0.0125958	0.0101819	0.00998423	0.00976929	0.0095634	0.00937215	0.00916798	0.00894831	0.00872605	0.00852317		1.71718	1.71721	1.71721	1.71719	1.71715	1.71708	1.71698	1.71685	1.71671		0.00523727	0.0051358	0.00502542	0.00491959	0.00482124	0.00471617	0.00460305	0.00448852	0.00438394
388	0.00824583	0.0124943	0.0101135	0.00991845	0.00970645	0.00950337	0.00931474	0.00911336	0.00889669	0.00867747	0.00847737		1.6646	1.66462	1.66463	1.6646	1.66457	1.6645	1.6644	1.66428	1.66414		0.0050428	0.00494577	0.00484023	0.00473905	0.00464501	0.00454455	0.00443639	0.00432688	0.00422688
389	0.00824307	0.0125944	0.0101559	0.00995619	0.00973906	0.00953107	0.00933787	0.00913161	0.0089097	0.00868517	0.00848022		1.93627	1.9363	1.9363	1.93628	1.93624	1.93616	1.93605	1.9359	1.93574		0.0058904	0.00577481	0.00564908	0.00552853	0.00541651	0.00529682	0.00516797	0.00503751	0.00491839
390	0.00828101	0.0125171	0.0101432	0.00994876	0.00973738	0.00953489	0.00934681	0.00914602	0.00892998	0.0087114	0.00851188		1.93508	1.93511	1.93511	1.93509	1.93505	1.93497	1.93486	1.93471	1.93455		0.00587942	0.00576696	0.00564463	0.00552735	0.00541835	0.0053019	0.00517653	0.0050496	0.00493369
391	0.00813556	0.0126207	0.0101072	0.00990138	0.00967757	0.00946318	0.00926403	0.00905144	0.00882269	0.00859126	0.00838001		2.11462	2.11465	2.11466	2.11463	2.11459	2.1145	2.11438	2.11422	2.11404		0.00640219	0.00627207	0.00613053	0.00599483	0.00586872	0.00573399	0.00558895	0.00544212	0.00530803
392	0.00824522	0.0124157	0.0100785	0.00988712	0.00967902	0.00947967	0.0092945	0.00909682	0.00888413	0.00866894	0.00847251		2.15212	2.15215	2.15216	2.15213	2.15208	2.152	2.15187	2.15171	2.15153		0.00649725	0.00637411	0.00624017	0.00611175	0.00599241	0.0058649	0.00572762	0.00558864	0.00546172
393	0.0080968	0.0124802	0.0100238	0.00982256	0.00960383	0.0093943	0.00919967	0.0089919	0.00876834	0.00854216	0.0083357		2.37258	2.37261	2.37262	2.37259	2.37253	2.37244	2.3723	2.37212	2.37193		0.00712392	0.00698123	0.00682602	0.00667722	0.00653893	0.0063912	0.00623215	0.00607113	0.00592409
394	0.00810069	0.0125688	0.0100649	0.00985979	0.00963683	0.00942326	0.00922487	0.00901308	0.00878521	0.00855465	0.00834421		2.4676	2.46763	2.46765	2.46761	2.46756	2.46746	2.46732	2.46713	2.46693		0.00743959	0.00728832	0.00712378	0.00696603	0.00681943	0.00666282	0.00649421	0.00632351	0.00616764
395	0.00807038	0.0124252	0.00998475	0.00978486	0.00956756	0.0093594	0.00916605	0.00895963	0.00873753	0.00851283	0.00830772		2.64088	2.64091	2.64093	2.64089	2.64083	2.64073	2.64058	2.64037	2.64016		0.00789872	0.00774093	0.0075693	0.00740475	0.00725182	0.00708845	0.00691257	0.00673451	0.00657191
396	0.00804862	0.0124371	0.00997781	0.00977637	0.00955739	0.00934762	0.00915277	0.00894475	0.00872094	0.00849449	0.00828779		2.89646	2.8965	2.89651	2.89647	2.89641	2.8963	2.89613	2.89591	2.89567		0.00865713	0.00848273	0.00829303	0.00811116	0.00794214	0.00776157	0.00756718	0.00737038	0.00719067
397	0.00791065	0.0123387	0.00985722	0.00965398	0.00943302	0.00922136	0.00902475	0.00881486	0.00858903	0.00836054	0.00815198		3.16121	3.16125	3.16126	3.16122	3.16115	3.16103	3.16084	3.1606	3.16034		0.00933441	0.00914234	0.00893342	0.00873314	0.008547	0.00834816	0.00813409	0.00791737	0.00771948
398	0.00786589	0.0122765	0.0098048	0.00960235	0.00938226	0.00917143	0.0089756	0.00876654	0.0085416	0.00831401	0.00810627		3.45181	3.45186	3.45187	3.45183	3.45175	3.45162	3.45142	3.45115	3.45087		0.0101384	0.00992948	0.00970225	0.00948441	0.00928197	0.00906569	0.00883286	0.00859715	0.00838191
399	0.00800172	0.0123353	0.00990677	0.00970786	0.00949161	0.00928446	0.00909205	0.00888664	0.00866562	0.00844201	0.0082379		3.64571	3.64575	3.64577	3.64572	3.64564	3.6455	3.64529	3.64501	3.64471		0.0108191	0.0106023	0.0103665	0.0101404	0.00993036	0.00970593	0.0094643	0.00921969	0.00899631
400	0.00785096	0.0124438	0.00986995	0.00965914	0.00942996	0.00921042	0.0090065	0.00878881	0.00855457	0.00831758	0.00810126		3.91633	3.91638	3.9164	3.91635	3.91626	3.9161	3.91588	3.91558	3.91526		0.011579	0.0113322	0.0110638	0.0108064	0.0105673	0.0103118	0.0100367	0.00975827	0.00950402
401	0.00797663	0.0122205	0.00984223	0.00964743	0.00943567	0.00923281	0.00904438	0.00884322	0.00862679	0.0084078	0.00820792		4.40792	4.40798	4.408	4.40794	4.40785	4.40767	4.40742	4.40708	4.40672		0.0129959	0.0127393	0.0124601	0.0121924	0.0119437	0.0116779	0.0113918	0.0111022	0.0108377
402	0.00777495	0.0123404	0.0097819	0.00957235	0.00934454	0.00912631	0.00892361	0.0087072	0.00847437	0.00823879	0.00802376		4.68914	4.6892	4.68922	4.68916	4.68905	4.68887	4.6886	4.68824	4.68786		0.0137404	0.0134467	0.0131272	0.0128209	0.0125362	0.0122321	0.0119047	0.0115733	0.0112707
403	0.0078174	0.0121157	0.00970694	0.00950964	0.00929516	0.0090897	0.00889885	0.00869511	0.0084759	0.00825411	0.00805166		5.11706	5.11712	5.11715	5.11708	5.11697	5.11677	5.11647	5.11608	5.11567		0.0148796	0.0145778	0.0142495	0.0139348	0.0136423	0.0133299	0.0129935	0.0126529	0.012342
404	0.00784399	0.0122415	0.00977712	0.00957528	0.00935584	0.00914564	0.00895039	0.00874195	0.00851768	0.00829077	0.00808365		5.72017	5.72024	5.72027	5.72019	5.72007	5.71984	5.71951	5.71908	5.71861		0.0167534	0.0164083	0.0160329	0.0156729	0.0153385	0.0149811	0.0145964	0.014207	0.0138514
405	0.00770931	0.0120258	0.00960683	0.0094087	0.00919331	0.00898698	0.00879533	0.00859073	0.00837059	0.00814786	0.00794456		6.59809	6.59818	6.59821	6.59812	6.59798	6.59772	6.59734	6.59684	6.5963		0.0189886	0.0185978	0.0181727	0.0177652	0.0173865	0.0169819	0.0165463	0.0161054	0.0157027
406	0.00787602	0.0122975	0.00981969	0.00961675	0.00939612	0.00918477	0.00898846	0.00877888	0.00855339	0.00832524	0.00811699		7.00452	7.00461	7.00464	7.00455	7.0044	7.00412	7.00372	7.00319	7.00262		0.0206043	0.0201794	0.0197171	0.019274	0.0188622	0.0184223	0.0179486	0.0174692	0.0170313
407	0.00761517	0.012098	0.00958581	0.00938005	0.00915636	0.00894208	0.00874304	0.00853056	0.00830194	0.00807062	0.00785948		7.79001	7.79011	7.79014	7.79004	7.78987	7.78956	7.78912	7.78853	7.7879		0.0223699	0.0218907	0.0213694	0.0208697	0.0204054	0.0199093	0.0193753	0.0188347	0.018341
408	0.00772391	0.0120204	0.00961266	0.00941545	0.00920106	0.00899568	0.00880491	0.00860126	0.00838214	0.00816043	0.00795807		8.84491	8.84502	8.84506	8.84495	8.84475	8.84441	8.8439	8.84323	8.84251		0.0254702	0.0249487	0.0243815	0.0238377	0.0233324	0.0227925	0.0222113	0.0216229	0.0210856
409	0.00751691	0.0118359	0.00941553	0.00921729	0.00900177	0.00879533	0.00860356	0.00839884	0.00817858	0.00795572	0.00775229		9.97404	9.97417	9.97421	9.97408	9.97386	9.97347	9.9729	9.97215	9.97134		0.0281335	0.0275423	0.0268993	0.0262829	0.02571	0.0250981	0.0244393	0.0237723	0.0231633
410	0.00758352	0.0119161	0.00948811	0.00928924	0.00907305	0.00886595	0.00867359	0.00846823	0.00824727	0.00802371	0.00781964		11.2707	11.2708	11.2709	11.2707	11.2705	11.27	11.2694	11.2685	11.2676		0.0320356	0.0313655	0.0306366	0.0299379	0.0292885	0.0285948	0.027848	0.027092	0.0264017
411	0.00752476	0.0119222	0.00945788	0.00925604	0.0090366	0.0088264	0.00863116	0.00842272	0.00819845	0.00797154	0.00776442		12.9699	12.9701	12.9701	12.97	12.9697	12.9692	12.9684	12.9675	12.9664		0.0367482	0.0359655	0.0351142	0.034298	0.0335396	0.0327294	0.0318571	0.0309741	0.0301679
412	0.00762426	0.0117259	0.00942734	0.00923907	0.0090344	0.00883834	0.00865623	0.00846181	0.00825263	0.00804099	0.0078478		15.0003	15.0005	15.0005	15.0003	15	14.9994	14.9986	14.9974	14.9962		0.0423638	0.0415195	0.0406012	0.0397207	0.0389025	0.0380284	0.0370873	0.0361346	0.0352647
413	0.00747914	0.0118143	0.00938486	0.00918588	0.00896956	0.00876234	0.00856986	0.00836437	0.00814328	0.00791959	0.0077154		17.3776	17.3778	17.3779	17.3777	17.3773	17.3766	17.3756	17.3743	17.3729		0.0488571	0.0478232	0.0466987	0.0456207	0.0446189	0.0435486	0.0423965	0.0412302	0.0401652
414	0.00761691	0.0118526	0.00947892	0.00928451	0.00907314	0.00887068	0.00868261	0.00848184	0.00826582	0.00804726	0.00784776		20.2139	20.2141	20.2142	20.2139	20.2135	20.2127	20.2116	20.21	20.2084		0.0574	0.0562251	0.0549471	0.0537219	0.0525833	0.0513669	0.0500574	0.0487318	0.0475212
415	0.00742714	0.011751	0.00932792	0.00912945	0.00891369	0.00870701	0.00851503	0.00831007	0.00808955	0.00786644	0.00766279		23.6939	23.6942	23.6943	23.694	23.6935	23.6925	23.6912	23.6894	23.6875		0.0662116	0.0648056	0.0632764	0.0618103	0.0604479	0.0589924	0.0574256	0.0558395	0.0543911
416	0.0075428	0.0115917	0.0093227	0.00913686	0.00893481	0.00874128	0.0085615	0.00836959	0.00816309	0.00795417	0.00776346		27.6541	27.6545	27.6546	27.6543	27.6537	27.6526	27.651	27.6489	27.6467		0.0772353	0.0756988	0.0740274	0.0724251	0.070936	0.0693451	0.0676325	0.0658986	0.0643153
417	0.00745033	0.0116863	0.00931246	0.00911803	0.00890666	0.00870418	0.0085161	0.00831531	0.00809928	0.0078807	0.00768119		32.6209	32.6214	32.6215	32.6211	32.6204	32.6191	32.6172	32.6148	32.6122		0.0910072	0.0891108	0.0870482	0.0850708	0.0832331	0.08127	0.0791567	0.0770172	0.0750636
418	0.00741601	0.0114844	0.00920448	0.00901774	0.00881473	0.00862026	0.00843962	0.00824678	0.00803929	0.00782936	0.00763774		38.4961	38.4966	38.4968	38.4963	38.4955	38.494	38.4918	38.4889	38.4858		0.106154	0.104005	0.101667	0.0994258	0.0973429	0.0951177	0.0927221	0.0902969	0.0880824
419	0.0073745	0.0116017	0.00923279	0.00903876	0.00882782	0.00862576	0.00843807	0.0082377	0.00802211	0.00780398	0.00760488		45.7198	45.7204	45.7206	45.72	45.719	45.7172	45.7146	45.7112	45.7075		0.126461	0.123809	0.120924	0.118158	0.115588	0.112842	0.109886	0.106894	0.104161
420	0.00724393	0.0112554	0.00900739	0.00882326	0.00862308	0.00843133	0.00825322	0.00806308	0.00785849	0.0076515	0.00746255		53.6873	53.688	53.6882	53.6876	53.6864	53.6843	53.6813	53.6772	53.6729		0.144879	0.141923	0.138708	0.135626	0.132761	0.129701	0.126407	0.123072	0.120027
421	0.00742593	0.0113223	0.00913877	0.00895993	0.0087655	0.00857925	0.00840626	0.00822157	0.00802285	0.0078218	0.00763828		63.3235	63.3244	63.3246	63.3238	63.3225	63.32	63.3164	63.3116	63.3066		0.173372	0.169986	0.166303	0.162772	0.15949	0.155984	0.15221	0.148389	0.1449
422	0.00714587	0.0111749	0.00891705	0.00873211	0.00853106	0.00833847	0.00815958	0.0079686	0.00776312	0.00755522	0.00736545		74.0518	74.0527	74.053	74.0521	74.0505	74.0476	74.0434	74.0379	74.0319		0.197832	0.193737	0.189283	0.185013	0.181045	0.176805	0.172242	0.167622	0.163403
423	0.00747501	0.0114864	0.00923841	0.00905429	0.00885412	0.00866238	0.00848427	0.00829413	0.00808956	0.00788257	0.00769363		86.1315	86.1326	86.133	86.1319	86.13	86.1267	86.1218	86.1153	86.1084		0.238385	0.233643	0.228486	0.223541	0.218946	0.214037	0.208753	0.203402	0.198517
424	0.00713968	0.0113815	0.0090044	0.0088097	0.00859803	0.00839527	0.00820693	0.00800587	0.00778953	0.00757065	0.00737086		99.9009	99.9022	99.9026	99.9013	99.8992	99.8953	99.8896	99.8821	99.8741		0.2695	0.263684	0.257358	0.251293	0.245657	0.239637	0.233156	0.226594	0.220604
425	0.00714945	0.0112822	0.00896621	0.00877652	0.00857029	0.00837275	0.00818925	0.00799336	0.00778259	0.00756934	0.00737469		116.121	116.122	116.123	116.121	116.119	116.114	116.107	116.099	116.089		0.311929	0.305342	0.298178	0.29131	0.284927	0.278109	0.270769	0.263338	0.256553
426	0.00719929	0.0113278	0.0090142	0.0088247	0.00861868	0.00842134	0.00823803	0.00804234	0.00783178	0.00761875	0.00742429		134.033	134.034	134.035	134.033	134.03	134.025	134.018	134.007	133.997		0.361969	0.354374	0.346114	0.338194	0.330835	0.322973	0.314509	0.305941	0.298117
427	0.00712327	0.0110622	0.00885484	0.00867404	0.00847749	0.0082892	0.00811432	0.00792761	0.00772672	0.00752347	0.00733795		154.032	154.034	154.035	154.033	154.03	154.024	154.015	154.004	153.991		0.408637	0.400309	0.391251	0.382568	0.374498	0.365877	0.356596	0.3472	0.338621
428	0.00721157	0.0112294	0.00897781	0.00879339	0.0085929	0.00840085	0.00822246	0.00803201	0.0078271	0.00761978	0.00743054		176.146	176.148	176.149	176.147	176.143	176.136	176.126	176.113	176.099		0.473784	0.46407	0.453505	0.443376	0.433963	0.423908	0.413083	0.402124	0.392116
429	0.00705471	0.0108276	0.00871328	0.0085401	0.00835183	0.00817149	0.00800397	0.00782514	0.00763272	0.00743804	0.00726034		201.047	201.049	201.05	201.047	201.043	201.035	201.024	201.009	200.993		0.524846	0.514435	0.50311	0.492253	0.482164	0.471385	0.459781	0.448034	0.437306
430	0.0070831	0.0109158	0.00876793	0.00859202	0.00840077	0.00821757	0.0080474	0.00786573	0.00767026	0.0074725	0.00729198		227.615	227.618	227.619	227.616	227.611	227.602	227.589	227.572	227.554		0.597927	0.585953	0.572929	0.560443	0.54884	0.536444	0.523099	0.509589	0.497252
431	0.00690778	0.0110029	0.00870799	0.00852003	0.00831568	0.00811994	0.00793811	0.007744	0.00753515	0.00732385	0.00713097		256.146	256.149	256.15	256.147	256.142	256.132	256.117	256.098	256.078		0.668282	0.653884	0.638223	0.62321	0.609259	0.594355	0.578311	0.562069	0.547239
432	0.0071189	0.0112609	0.00893972	0.00874961	0.00854292	0.00834493	0.00816103	0.0079647	0.00775345	0.00753973	0.00734464		286.724	286.727	286.729	286.725	286.719	286.708	286.692	286.67	286.647		0.767939	0.751639	0.733909	0.716912	0.701117	0.684244	0.66608	0.647692	0.630901
433	0.00669096	0.0104791	0.00835622	0.00818234	0.00799332	0.00781225	0.00764405	0.0074645	0.0072713	0.00707583	0.00689741		322.095	322.099	322.1	322.096	322.089	322.077	322.059	322.035	322.009		0.806437	0.789687	0.771469	0.754004	0.737774	0.720435	0.70177	0.682874	0.66562
434	0.00683	0.0107354	0.00854679	0.00836754	0.00817266	0.00798598	0.00781259	0.00762747	0.0074283	0.00722678	0.00704284		360.881	360.886	360.887	360.883	360.875	360.861	360.841	360.814	360.785		0.924128	0.904781	0.883739	0.863566	0.84482	0.824793	0.803235	0.78141	0.761481
435	0.00692162	0.010985	0.00870789	0.00852138	0.00831861	0.00812438	0.00794397	0.00775136	0.00754413	0.00733446	0.00714307		407.318	407.323	407.325	407.319	407.311	407.295	407.272	407.242	407.209		1.06267	1.03996	1.01525	0.991557	0.969543	0.946027	0.920712	0.895085	0.871684
436	0.00670805	0.0105149	0.00838156	0.00820682	0.00801686	0.00783489	0.00766586	0.00748542	0.00729127	0.00709483	0.00691552		460.385	460.391	460.393	460.387	460.377	460.359	460.333	460.299	460.263		1.15617	1.13211	1.10594	1.08085	1.05754	1.03263	1.00582	0.978681	0.953897
437	0.00701464	0.0109465	0.00874309	0.00856262	0.00836642	0.00817848	0.0080039	0.00781753	0.007617	0.00741412	0.00722893		518.357	518.363	518.366	518.359	518.348	518.328	518.299	518.26	518.219		1.35783	1.32986	1.29943	1.27026	1.24315	1.21419	1.18301	1.15145	1.12263
438	0.0067395	0.0104944	0.00839017	0.00821781	0.00803044	0.00785096	0.00768424	0.00750625	0.00731475	0.007121	0.00694414		587.524	587.531	587.534	587.526	587.514	587.491	587.458	587.415	587.368		1.47697	1.44668	1.41374	1.38216	1.35282	1.32147	1.28772	1.25355	1.22236
439	0.00687807	0.0107884	0.00859703	0.00841755	0.00822243	0.00803551	0.0078619	0.00767655	0.00747713	0.00727535	0.00709118		663.135	663.143	663.146	663.138	663.123	663.098	663.061	663.012	662.959		1.70809	1.6725	1.63378	1.59667	1.56218	1.52533	1.48567	1.44552	1.40885
440	0.00688071	0.0106242	0.00852636	0.00835453	0.00816773	0.00798879	0.00782258	0.00764513	0.00745421	0.00726105	0.00708473		740.731	740.74	740.743	740.734	740.718	740.69	740.648	740.593	740.534		1.8923	1.85424	1.81283	1.77314	1.73626	1.69685	1.65443	1.61149	1.57227
441	0.00652365	0.0102774	0.00817379	0.00800149	0.00781418	0.00763475	0.00746809	0.00729016	0.00709872	0.00690503	0.00672823		817.024	817.035	817.038	817.028	817.01	816.979	816.933	816.873	816.808		2.001	1.9589	1.9131	1.8692	1.8284	1.78482	1.7379	1.69041	1.64704
442	0.00690361	0.0106468	0.00854911	0.0083773	0.00819051	0.00801159	0.00784539	0.00766797	0.00747707	0.00728392	0.00710761		885.162	885.173	885.177	885.165	885.147	885.113	885.063	884.998	884.927		2.26729	2.22181	2.17235	2.12492	2.08085	2.03376	1.98308	1.93176	1.88491
443	0.0065623	0.0103224	0.00821522	0.00804264	0.00785501	0.00767528	0.00750833	0.0073301	0.00713834	0.00694432	0.00676722		935.04	935.052	935.056	935.044	935.024	934.988	934.936	934.867	934.793		2.30163	2.25337	2.20087	2.15054	2.10377	2.05381	2.00003	1.94558	1.89586
444	0.00665013	0.010512	0.00834779	0.00817053	0.00797783	0.00779323	0.00762177	0.00743872	0.00724177	0.0070425	0.0068606		958.281	958.293	958.297	958.285	958.265	958.228	958.174	958.104	958.028		2.39686	2.34605	2.2908	2.23782	2.1886	2.13601	2.0794	2.02209	1.96977
445	0.00661625	0.0103402	0.00825331	0.00808238	0.00789655	0.00771854	0.0075532	0.00737668	0.00718676	0.0069946	0.0068192		951.144	951.156	951.16	951.148	951.128	951.091	951.038	950.968	950.892		2.35211	2.30349	2.2506	2.19989	2.15278	2.10244	2.04826	1.9934	1.94331
446	0.00651886	0.0103631	0.00820877	0.00803232	0.0078405	0.00765675	0.00748606	0.00730385	0.0071078	0.00690943	0.00672837		911.3	911.312	911.315	911.304	911.285	911.25	911.199	911.132	911.06		2.24144	2.19334	2.14103	2.09088	2.04428	1.9945	1.94091	1.88667	1.83713
447	0.00670989	0.0104925	0.00837273	0.00819911	0.00801036	0.00782955	0.0076616	0.0074823	0.00728939	0.00709421	0.00691604		845.59	845.601	845.605	845.594	845.576	845.544	845.496	845.434	845.367		2.12131	2.0774	2.02964	1.98385	1.94131	1.89586	1.84693	1.79739	1.75216
448	0.00653646	0.0103294	0.00820382	0.00802973	0.00784046	0.00765916	0.00749076	0.00731097	0.00711754	0.00692182	0.00674318		760.273	760.283	760.286	760.276	760.26	760.231	760.189	760.133	760.073		1.86884	1.82926	1.7862	1.74492	1.70656	1.66558	1.62147	1.57681	1.53604
449	0.00677817	0.0104734	0.00840259	0.00823298	0.00804859	0.00787195	0.00770789	0.00753273	0.00734428	0.00715361	0.00697956		664.698	664.707	664.71	664.701	664.687	664.662	664.625	664.576	664.523		1.67345	1.63973	1.60306	1.5679	1.53522	1.50032	1.46275	1.4247	1.38997
450	0.00671352	0.0102699	0.00827693	0.00811369	0.00793622	0.00776622	0.00760832	0.00743974	0.00725837	0.00707486	0.00690735		568.355	568.362	568.364	568.357	568.345	568.323	568.292	568.25	568.205		1.40952	1.38177	1.35159	1.32266	1.29577	1.26704	1.23611	1.20481	1.17622
451	0.00652291	0.0105373	0.00828762	0.00810336	0.00790304	0.00771116	0.00753292	0.00734264	0.00713791	0.00693077	0.00674169		482.146	482.152	482.154	482.148	482.138	482.119	482.092	482.057	482.019		1.19726	1.17069	1.14179	1.11409	1.08834	1.06084	1.03123	1.00127	0.973901
452	0.00679799	0.010427	0.00839328	0.00822671	0.00804563	0.00787216	0.00771104	0.00753902	0.00735395	0.00716669	0.00699577		407.001	407.006	407.008	407.003	406.994	406.979	406.956	406.926	406.894		1.02353	1.00326	0.981206	0.960064	0.940417	0.919427	0.896831	0.873955	0.853066
453	0.00639392	0.010227	0.00807893	0.00790299	0.00771172	0.0075285	0.00735832	0.00717663	0.00698114	0.00678336	0.00660282		345.301	345.305	345.307	345.302	345.295	345.282	345.263	345.237	345.21		0.835885	0.817713	0.797949	0.779003	0.761396	0.742588	0.722341	0.701846	0.683131
454	0.00651617	0.0104989	0.00826697	0.00808417	0.00788543	0.00769505	0.00751822	0.00732944	0.00712632	0.00692081	0.00673323		297.832	297.835	297.837	297.833	297.827	297.815	297.799	297.777	297.753		0.737734	0.72145	0.703738	0.686759	0.670981	0.654126	0.635983	0.617616	0.600845
455	0.0064704	0.00998251	0.00801432	0.00785312	0.00767786	0.00750998	0.00735405	0.00718757	0.00700845	0.00682723	0.00666181		261.881	261.884	261.886	261.882	261.877	261.867	261.852	261.833	261.812		0.628884	0.616257	0.602522	0.589355	0.577119	0.564047	0.549975	0.535729	0.522721
456	0.00638384	0.0102161	0.00806851	0.00789261	0.00770138	0.00751819	0.00734804	0.00716639	0.00697095	0.0067732	0.0065927		235.082	235.085	235.086	235.083	235.078	235.069	235.056	235.039	235.021		0.568341	0.555972	0.542519	0.529623	0.517639	0.504837	0.491056	0.477105	0.464367
457	0.00664082	0.0101761	0.00819494	0.00803267	0.00785625	0.00768727	0.0075303	0.00736273	0.00718243	0.007	0.00683349		214.527	214.53	214.531	214.528	214.524	214.516	214.504	214.488	214.471		0.526764	0.516352	0.505028	0.494171	0.484082	0.473303	0.4617	0.449953	0.439226
458	0.00636285	0.00992889	0.00793048	0.0077668	0.00758886	0.0074184	0.00726007	0.00709104	0.00690917	0.00672516	0.0065572		197.24	197.243	197.244	197.241	197.237	197.23	197.219	197.204	197.189		0.468706	0.459049	0.448545	0.438476	0.429119	0.419123	0.408362	0.397468	0.387521
459	0.00641873	0.0102554	0.00810532	0.00792922	0.00773777	0.00755438	0.00738403	0.00720217	0.0070065	0.00680853	0.00662783		182.525	182.527	182.528	182.526	182.522	182.515	182.505	182.492	182.477		0.443288	0.433674	0.423217	0.413193	0.403877	0.393926	0.383214	0.37237	0.362468
460	0.00657073	0.00998852	0.00807319	0.00791632	0.00774577	0.0075824	0.00743065	0.00726864	0.00709434	0.00691798	0.006757		167.999	168.001	168.002	168	167.996	167.99	167.98	167.968	167.955		0.406394	0.398511	0.389937	0.381717	0.374079	0.365918	0.357132	0.348238	0.340116
461	0.00623754	0.0101512	0.00795798	0.00777834	0.00758305	0.00739598	0.00722221	0.00703671	0.00683711	0.00663517	0.00645084		153.68	153.682	153.682	153.681	153.677	153.671	153.663	153.652	153.64		0.366457	0.358199	0.349217	0.340607	0.332607	0.32406	0.31486	0.305547	0.297044
462	0.00652871	0.0104973	0.00827329	0.00809114	0.00789311	0.00770341	0.0075272	0.00733909	0.0071367	0.00693192	0.006745		139.575	139.576	139.577	139.575	139.572	139.567	139.559	139.549	139.538		0.345993	0.338389	0.330118	0.322189	0.314821	0.306951	0.298478	0.289902	0.28207
463	0.00640075	0.00984596	0.00791527	0.00775713	0.00758522	0.00742054	0.00726757	0.00710427	0.00692856	0.00675079	0.00658852		125.726	125.728	125.728	125.726	125.724	125.719	125.712	125.703	125.693		0.298192	0.292245	0.285777	0.279576	0.273813	0.267657	0.26103	0.25432	0.248194
464	0.0062403	0.0102311	0.00799466	0.00781148	0.00761234	0.00742158	0.00724439	0.00705522	0.00685169	0.00664577	0.0064578		112.361	112.363	112.363	112.362	112.359	112.355	112.349	112.341	112.332		0.269164	0.263007	0.256311	0.249892	0.243927	0.237555	0.230697	0.223754	0.217414
465	0.00656839	0.010008	0.00808045	0.00792257	0.00775093	0.00758652	0.0074338	0.00727076	0.00709534	0.00691786	0.00675585		99.9199	99.9211	99.9215	99.9203	99.9182	99.9144	99.9089	99.9016	99.8938		0.241926	0.237208	0.232076	0.227156	0.222583	0.217699	0.21244	0.207117	0.202255
466	0.00634368	0.0101692	0.00802538	0.00784979	0.00765889	0.00747603	0.00730618	0.00712485	0.00692975	0.00673235	0.00655217		88.3486	88.3497	88.3501	88.349	88.3471	88.3438	88.3389	88.3325	88.3256		0.212453	0.207813	0.202766	0.197928	0.193432	0.188629	0.183459	0.178226	0.173447
467	0.00631108	0.0105217	0.00816207	0.00796881	0.0077587	0.00755743	0.00737048	0.00717089	0.00695615	0.00673888	0.00654056		78.209	78.21	78.2103	78.2093	78.2077	78.2047	78.2004	78.1947	78.1886		0.19127	0.186749	0.181831	0.177118	0.172737	0.168058	0.163022	0.157924	0.153269
468	0.0066315	0.0100005	0.0081125	0.00795787	0.00778976	0.00762872	0.00747914	0.00731945	0.00714763	0.00697379	0.00681511		69.9671	69.968	69.9683	69.9674	69.966	69.9633	69.9595	69.9544	69.9489		0.170076	0.16684	0.16332	0.159945	0.156809	0.153459	0.149853	0.146201	0.142867
469	0.00614643	0.0101513	0.00790697	0.00772314	0.0075233	0.00733187	0.00715405	0.00696422	0.00675997	0.00655332	0.00636469		63.2131	63.2138	63.2141	63.2133	63.212	63.2096	63.2061	63.2015	63.1966		0.149769	0.146293	0.142513	0.138889	0.135521	0.131924	0.128052	0.124132	0.120553
470	0.0064937	0.0105275	0.00826695	0.0080818	0.00788051	0.0076877	0.0075086	0.0073174	0.00711168	0.00690353	0.00671354		58.1378	58.1385	58.1387	58.138	58.1368	58.1346	58.1314	58.1272	58.1226		0.144008	0.140788	0.137287	0.13393	0.13081	0.127478	0.123891	0.12026	0.116945
471	0.0064463	0.0101771	0.00808636	0.00791512	0.00772895	0.00755062	0.00738497	0.00720813	0.00701786	0.00682535	0.00664963		54.3002	54.3009	54.3011	54.3005	54.2993	54.2973	54.2943	54.2903	54.2861		0.131568	0.128787	0.125761	0.122861	0.120167	0.117288	0.114189	0.111051	0.108187
472	0.00615198	0.010253	0.00795478	0.00776654	0.0075619	0.00736588	0.00718379	0.0069894	0.00678025	0.00656864	0.00637548		50.9664	50.9671	50.9673	50.9666	50.9656	50.9637	50.9609	50.9571	50.9532		0.121483	0.118613	0.115492	0.1125	0.10972	0.10675	0.103553	0.100317	0.0973622
473	0.00628445	0.0100504	0.00793997	0.00776711	0.00757919	0.00739917	0.00723197	0.00705346	0.0068614	0.00666707	0.00648969		48.637	48.6376	48.6378	48.6372	48.6361	48.6343	48.6316	48.6281	48.6243		0.115715	0.1132	0.110465	0.107843	0.105406	0.102803	0.100001	0.0971649	0.094575
474	0.00629325	0.00975525	0.00781515	0.00765624	0.00748349	0.007318	0.00716429	0.00700019	0.00682363	0.00664499	0.00648193		46.7179	46.7185	46.7187	46.7181	46.7171	46.7154	46.7128	46.7094	46.7058		0.109404	0.107183	0.104768	0.102452	0.100301	0.098002	0.0955274	0.0930223	0.0907348
475	0.00600125	0.0100961	0.00780135	0.0076134	0.00740906	0.00721333	0.00703152	0.00683742	0.00662858	0.00641729	0.00622442		45.0228	45.0234	45.0236	45.023	45.0221	45.0204	45.0179	45.0146	45.0111		0.105248	0.102717	0.0999636	0.0973244	0.094872	0.0922524	0.0894326	0.0865782	0.0839721
476	0.00624911	0.0099554	0.00787839	0.00770828	0.00752333	0.00734617	0.00718161	0.00700593	0.00681691	0.00662567	0.0064511		43.6866	43.6872	43.6874	43.6868	43.6859	43.6843	43.6819	43.6787	43.6753		0.103132	0.100909	0.0984912	0.0961733	0.0940193	0.0917183	0.0892414	0.0867339	0.0844444
477	0.00626102	0.00995082	0.00788305	0.00771369	0.00752957	0.0073532	0.00718937	0.00701448	0.0068263	0.0066359	0.00646211		42.1546	42.1551	42.1553	42.1548	42.1539	42.1523	42.15	42.147	42.1437		0.0995744	0.0974388	0.095116	0.0928893	0.0908201	0.0886097	0.0862302	0.0838215	0.081622
478	0.00592922	0.0101331	0.00777727	0.00758431	0.00737453	0.00717358	0.00698693	0.00678766	0.00657326	0.00635634	0.00615833		40.8307	40.8312	40.8314	40.8309	40.83	40.8285	40.8262	40.8233	40.8201		0.0951543	0.0927973	0.0902338	0.0877766	0.0854933	0.0830544	0.0804291	0.0777718	0.0753455
479	0.00648468	0.00975735	0.00792335	0.00777313	0.00760983	0.00745339	0.00730809	0.00715296	0.00698606	0.00681719	0.00666304		39.5846	39.5851	39.5852	39.5847	39.5839	39.5824	39.5802	39.5774	39.5743		0.0939809	0.0922024	0.0902679	0.0884133	0.0866897	0.0848484	0.0828661	0.0808592	0.0790266
480	0.00622379	0.00977796	0.00778621	0.00762307	0.00744572	0.00727583	0.00711802	0.00694956	0.00676829	0.0065849	0.0064175		38.5033	38.5037	38.5039	38.5034	38.5026	38.5012	38.4991	38.4963	38.4933		0.0898333	0.0879544	0.0859107	0.0839516	0.082131	0.0801862	0.0780925	0.0759731	0.0740378
481	0.00581634	0.00978161	0.00755947	0.00737747	0.0071796	0.00699006	0.006814	0.00662605	0.00642382	0.00621921	0.00603244		37.1391	37.1396	37.1397	37.1393	37.1385	37.1371	37.1351	37.1324	37.1295		0.0841302	0.0821079	0.0799084	0.0778001	0.075841	0.0737483	0.0714957	0.0692156	0.0671337
482	0.00628454	0.00983912	0.00784713	0.00768398	0.0075066	0.00733669	0.00717887	0.00701038	0.0068291	0.00664568	0.00647826		36.5716	36.572	36.5722	36.5717	36.571	36.5696	36.5676	36.5649	36.5621		0.0859933	0.0842085	0.0822672	0.0804061	0.0786767	0.0768292	0.0748404	0.0728271	0.0709886
483	0.00610189	0.00993241	0.00778579	0.00760997	0.00741882	0.00723573	0.00706565	0.00688408	0.00668873	0.00649107	0.00631065		35.7291	35.7295	35.7297	35.7292	35.7285	35.7271	35.7252	35.7226	35.7198		0.0833563	0.0814771	0.0794332	0.0774739	0.0756533	0.0737084	0.0716149	0.0694957	0.0675607
484	0.00577252	0.00960241	0.00745614	0.00728035	0.00708923	0.00690617	0.00673612	0.00655458	0.00635926	0.00616164	0.00598125		36.0596	36.06	36.0602	36.0597	36.059	36.0576	36.0557	36.0531	36.0503		0.0805694	0.0786729	0.0766103	0.074633	0.0727957	0.0708332	0.0687206	0.0665822	0.0646297
485	0.0058425	0.00793044	0.00676036	0.00666452	0.00656033	0.00646053	0.00636782	0.00626885	0.00616237	0.00605463	0.00595629		37.1242	37.1247	37.1249	37.1244	37.1236	37.1222	37.1202	37.1175	37.1147		0.0752156	0.0741514	0.0729936	0.0718833	0.0708513	0.0697486	0.0685611	0.0673587	0.0662605
486	0.00621827	0.00903655	0.00745719	0.00732783	0.00718719	0.00705248	0.00692735	0.00679376	0.00665003	0.00650461	0.00637186		37.9106	37.9111	37.9113	37.9108	37.91	37.9086	37.9065	37.9038	37.9008		0.0847172	0.0832503	0.0816546	0.0801247	0.0787029	0.0771839	0.0755484	0.0738926	0.0723805
487	0.00643117	0.0113418	0.00858987	0.00836447	0.00811943	0.00788471	0.00766668	0.00743391	0.00718347	0.00693009	0.0066988		38.9762	38.9767	38.9768	38.9763	38.9755	38.9741	38.9719	38.9691	38.9661		0.100311	0.0976831	0.0948254	0.0920861	0.0895408	0.0868221	0.0838957	0.0809337	0.0782292
488	0.00614055	0.0102064	0.00792791	0.00774129	0.0075384	0.00734405	0.00716353	0.0069708	0.00676344	0.00655364	0.00636214		41.3603	41.3609	41.361	41.3605	41.3597	41.3581	41.3558	41.3529	41.3497		0.0982535	0.0959444	0.0934331	0.0910258	0.0887889	0.0863994	0.0838273	0.0812237	0.0788464
489	0.00603125	0.00996392	0.00776005	0.00757954	0.0073833	0.00719532	0.00702071	0.0068343	0.00663374	0.00643081	0.00624558		43.5057	43.5062	43.5064	43.5059	43.505	43.5033	43.501	43.4978	43.4945		0.101164	0.0988148	0.0962597	0.0938104	0.0915343	0.0891031	0.0864861	0.083837	0.0814182
490	0.0058036	0.0102209	0.00774546	0.00754271	0.00732228	0.00711113	0.006915	0.00670562	0.00648034	0.0062524	0.00604434		46.2058	46.2064	46.2066	46.206	46.2051	46.2033	46.2008	46.1975	46.1939		0.107241	0.104438	0.10139	0.0984681	0.0957531	0.0928532	0.0897318	0.0865723	0.0836877
491	0.00609454	0.0103191	0.00795164	0.00775774	0.00754693	0.007345	0.00715743	0.00695719	0.00674174	0.00652375	0.00632478		49.6009	49.6015	49.6017	49.6011	49.6001	49.5982	49.5955	49.5919	49.5881		0.118182	0.115304	0.112175	0.109176	0.106388	0.103411	0.100207	0.0969628	0.0940009
492	0.0061344	0.0104415	0.00802779	0.0078301	0.00761517	0.0074093	0.00721806	0.00701391	0.00679424	0.006572	0.00636914		53.3543	53.355	53.3552	53.3546	53.3535	53.3515	53.3485	53.3447	53.3406		0.128341	0.125185	0.121754	0.118464	0.115408	0.112143	0.108628	0.105071	0.101823
493	0.00577236	0.00999417	0.00762827	0.00743449	0.00722382	0.00702202	0.00683457	0.00663446	0.00641914	0.0062013	0.00600245		57.2146	57.2153	57.2156	57.2149	57.2137	57.2115	57.2084	57.2043	57.1999		0.130785	0.127468	0.12386	0.120402	0.117189	0.113757	0.110063	0.106323	0.102909
494	0.0060279	0.00967721	0.00763213	0.00746463	0.00728253	0.00710809	0.00694607	0.00677309	0.00658697	0.00639867	0.00622679		61.6469	61.6476	61.6479	61.6471	61.6458	61.6435	61.6402	61.6357	61.631		0.140988	0.137899	0.134539	0.131318	0.128325	0.125128	0.121686	0.118203	0.115021
495	0.00610328	0.00970919	0.00768844	0.00752293	0.00734299	0.00717063	0.00701053	0.00683961	0.00665571	0.00646964	0.0062998		66.3554	66.3562	66.3565	66.3557	66.3543	66.3518	66.3482	66.3434	66.3383		0.152874	0.149589	0.146016	0.14259	0.139407	0.136007	0.132346	0.128641	0.125257
496	0.00576178	0.00949742	0.00740397	0.0072325	0.00704609	0.00686753	0.00670167	0.0065246	0.00633408	0.00614132	0.00596537		71.4824	71.4833	71.4836	71.4827	71.4812	71.4785	71.4746	71.4695	71.464		0.1586	0.154933	0.150944	0.147121	0.143569	0.139774	0.135689	0.131554	0.127778
497	0.00614921	0.00968467	0.0077034	0.00754112	0.0073647	0.0071957	0.00703873	0.00687115	0.00669084	0.00650841	0.00634189		76.5771	76.5781	76.5784	76.5774	76.5758	76.573	76.5688	76.5633	76.5574		0.176767	0.173049	0.169006	0.16513	0.161528	0.157681	0.153539	0.149346	0.145517
498	0.0059498	0.00980998	0.00764674	0.00746955	0.00727693	0.00709241	0.00692102	0.00673805	0.00654118	0.00634199	0.00616018		82.5335	82.5345	82.5349	82.5339	82.5321	82.5291	82.5246	82.5187	82.5123		0.189117	0.184742	0.179984	0.175423	0.171184	0.166657	0.161784	0.156851	0.152346
499	0.00574959	0.00945727	0.00737949	0.0072093	0.00702429	0.00684706	0.00668244	0.0065067	0.00631761	0.00612629	0.00595166		88.3449	88.346	88.3464	88.3453	88.3434	88.3401	88.3353	88.329	88.3222		0.195366	0.190867	0.185975	0.181285	0.176928	0.172273	0.167262	0.16219	0.157558
500	0.00583817	0.00930449	0.00736197	0.00720286	0.00702989	0.0068642	0.0067103	0.00654599	0.00636921	0.00619035	0.00602709		94.6937	94.6949	94.6953	94.6941	94.6921	94.6886	94.6835	94.6767	94.6694		0.208909	0.204401	0.199499	0.194799	0.190432	0.185767	0.180745	0.175661	0.171019
501	0.00580584	0.00957994	0.00746493	0.0072917	0.00710338	0.00692297	0.0067554	0.00657651	0.00638403	0.00618929	0.00601153		101.767	101.768	101.768	101.767	101.765	101.761	101.756	101.748	101.741		0.22765	0.222375	0.216639	0.21114	0.20603	0.200572	0.194697	0.18875	0.18332
502	0.00573512	0.00952636	0.00740175	0.00722773	0.00703855	0.00685733	0.006689	0.00650929	0.00631594	0.00612031	0.00594174		107.892	107.893	107.893	107.892	107.89	107.886	107.88	107.872	107.864		0.23931	0.233693	0.227584	0.221727	0.216285	0.210473	0.204215	0.197882	0.192099
503	0.00591153	0.00957654	0.00752266	0.00735444	0.00717156	0.00699637	0.00683364	0.00665992	0.00647301	0.00628389	0.00611127		114.967	114.969	114.969	114.968	114.965	114.961	114.955	114.947	114.938		0.259165	0.253379	0.247086	0.241054	0.235448	0.22946	0.223014	0.216489	0.210532
504	0.00595354	0.00955141	0.00753517	0.00737002	0.00719049	0.00701851	0.00685877	0.00668823	0.00650474	0.00631909	0.00614963		121.782	121.783	121.784	121.782	121.78	121.775	121.769	121.76	121.751		0.274983	0.268966	0.262422	0.256149	0.25032	0.244093	0.23739	0.230605	0.224409
505	0.00580218	0.00948318	0.00742035	0.00725139	0.00706771	0.00689176	0.00672832	0.00655384	0.00636611	0.00617617	0.0060028		128.828	128.83	128.83	128.829	128.826	128.821	128.814	128.805	128.795		0.286466	0.279954	0.272871	0.266082	0.259773	0.253033	0.245779	0.238436	0.231731
506	0.00586907	0.00933604	0.00739315	0.00723402	0.00706102	0.00689529	0.00674136	0.00657703	0.00640021	0.00622132	0.00605802		135.479	135.481	135.481	135.48	135.477	135.472	135.465	135.455	135.444		0.300152	0.293702	0.286687	0.279962	0.273713	0.267037	0.259851	0.252576	0.245934
507	0.00575455	0.00950776	0.00740446	0.00723219	0.00704491	0.0068655	0.00669886	0.00652096	0.00632955	0.00613588	0.0059591		143.215	143.217	143.217	143.216	143.213	143.207	143.2	143.189	143.178		0.317776	0.310395	0.302366	0.294671	0.28752	0.279881	0.271659	0.263335	0.255736
508	0.00553858	0.00961494	0.00733055	0.00714344	0.00694003	0.00674518	0.00656419	0.00637097	0.00616308	0.00595274	0.00576074		149.937	149.939	149.94	149.938	149.935	149.929	149.921	149.91	149.899		0.329374	0.32098	0.311851	0.3031	0.294969	0.286284	0.276936	0.267474	0.258835
509	0.00603744	0.00948904	0.00755476	0.00739634	0.0072241	0.00705911	0.00690586	0.00674226	0.00656622	0.00638812	0.00622555		156.486	156.488	156.489	156.487	156.484	156.478	156.469	156.458	156.446		0.354263	0.346847	0.33878	0.331047	0.323861	0.316184	0.30792	0.299555	0.291916
510	0.00577408	0.00959161	0.00745227	0.00727705	0.00708655	0.00690407	0.00673457	0.00655362	0.00635893	0.00616195	0.00598214		162.895	162.897	162.897	162.895	162.892	162.886	162.877	162.866	162.853		0.363774	0.355234	0.345946	0.337043	0.32877	0.319933	0.310421	0.300792	0.292001
511	0.00599041	0.00976178	0.00764831	0.0074752	0.00728701	0.00710674	0.00693929	0.00676053	0.00656819	0.00637358	0.00619595		169.36	169.362	169.363	169.361	169.358	169.351	169.342	169.33	169.317		0.388151	0.37938	0.369841	0.360697	0.3522	0.343123	0.333353	0.323462	0.314432
512	0.00579906	0.00971051	0.00751854	0.007339	0.00714382	0.00695685	0.00678318	0.00659778	0.0063983	0.00619647	0.00601224		175.17	175.172	175.173	175.171	175.167	175.161	175.151	175.139	175.125		0.394662	0.385253	0.375019	0.36521	0.356095	0.346359	0.335879	0.32527	0.315584
513	0.00600393	0.00939881	0.00749632	0.00734049	0.00717109	0.00700881	0.00685808	0.00669716	0.00652402	0.00634885	0.00618895		181.173	181.175	181.176	181.174	181.17	181.163	181.154	181.141	181.127		0.406981	0.398536	0.38935	0.380544	0.37236	0.363619	0.354208	0.344682	0.335983
514	0.00585362	0.00981881	0.00759672	0.00741472	0.00721685	0.00702732	0.00685126	0.00666331	0.00646109	0.00625648	0.00606972		186.886	186.889	186.89	186.887	186.883	186.876	186.866	186.853	186.839		0.425432	0.415256	0.404189	0.39358	0.383722	0.373192	0.361857	0.350384	0.339908
515	0.00590517	0.00964726	0.00755019	0.00737843	0.0071917	0.00701283	0.00684668	0.0066693	0.00647845	0.00628536	0.00610911		191.77	191.772	191.773	191.771	191.767	191.76	191.749	191.735	191.721		0.433878	0.424024	0.413306	0.403032	0.393485	0.383287	0.37231	0.361197	0.351051
516	0.00581402	0.00944627	0.00741076	0.00724404	0.00706279	0.00688917	0.0067279	0.00655573	0.00637048	0.00618306	0.00601198		196.75	196.753	196.754	196.751	196.747	196.74	196.729	196.715	196.7		0.436935	0.427121	0.416447	0.406216	0.396708	0.386552	0.375619	0.364552	0.354447
517	0.00577815	0.00950483	0.0074164	0.00724534	0.00705938	0.00688125	0.00671578	0.00653914	0.00634907	0.00615678	0.00598125		201.189	201.191	201.192	201.189	201.185	201.178	201.167	201.153	201.137		0.447131	0.436834	0.425636	0.414902	0.404927	0.394272	0.382802	0.371193	0.360592
518	0.00582761	0.00951035	0.00744654	0.0072775	0.00709374	0.0069177	0.00675419	0.00657963	0.00639181	0.00620178	0.00602832		206.168	206.171	206.171	206.169	206.165	206.157	206.146	206.131	206.115		0.460058	0.449631	0.438291	0.427421	0.417319	0.406529	0.394915	0.383157	0.372422
519	0.00585673	0.00921314	0.00733221	0.00717815	0.00701067	0.00685023	0.0067012	0.00654211	0.00637093	0.00619774	0.00603966		209.509	209.512	209.513	209.51	209.506	209.498	209.487	209.472	209.456		0.460343	0.450687	0.440184	0.430115	0.420759	0.410764	0.400005	0.389114	0.379169
520	0.0059478	0.00963805	0.00757003	0.00740065	0.00721651	0.00704011	0.00687627	0.00670135	0.00651314	0.00632273	0.00614892		212.961	212.963	212.964	212.962	212.957	212.949	212.938	212.923	212.907		0.483087	0.472296	0.460559	0.449308	0.438853	0.427684	0.415663	0.403493	0.392381
521	0.00571646	0.00963537	0.00743921	0.00725933	0.00706378	0.00687646	0.00670246	0.0065167	0.00631683	0.00611462	0.00593004		216.345	216.348	216.348	216.346	216.341	216.333	216.322	216.306	216.29		0.482292	0.470649	0.457986	0.445848	0.434569	0.422521	0.409552	0.396426	0.38444
522	0.00540762	0.00918259	0.0070671	0.00689383	0.00670546	0.00652501	0.0063574	0.00617847	0.00598595	0.00579116	0.00561336		219.488	219.491	219.492	219.489	219.484	219.476	219.465	219.449	219.432		0.46485	0.45347	0.441094	0.42923	0.418206	0.406432	0.393757	0.380928	0.369214
523	0.00576823	0.00903309	0.00720346	0.0070536	0.00689069	0.00673463	0.00658967	0.00643491	0.0062684	0.00609994	0.00594616		222.653	222.656	222.657	222.654	222.65	222.642	222.63	222.614	222.597		0.480643	0.47066	0.459803	0.449394	0.439722	0.429389	0.418266	0.407006	0.396725
524	0.00581125	0.00915726	0.00728216	0.00712857	0.00696161	0.00680167	0.00665311	0.00649451	0.00632386	0.00615121	0.00599361		224.59	224.593	224.594	224.591	224.586	224.578	224.566	224.55	224.533		0.490114	0.479794	0.46857	0.45781	0.447812	0.437131	0.425633	0.413994	0.403366
525	0.00584011	0.00950594	0.00745161	0.00728335	0.00710042	0.0069252	0.00676243	0.00658867	0.00640171	0.00621256	0.0060399		227.093	227.095	227.096	227.093	227.089	227.08	227.068	227.052	227.035		0.507094	0.495663	0.483229	0.47131	0.460235	0.448404	0.435669	0.422778	0.411008
526	0.00581637	0.00894104	0.00718998	0.00704655	0.00689063	0.00674127	0.00660254	0.00645443	0.00629507	0.00613384	0.00598667		229.882	229.885	229.886	229.883	229.878	229.87	229.857	229.841	229.823		0.495319	0.485455	0.474726	0.464441	0.454883	0.444672	0.433681	0.422553	0.412392
527	0.00584707	0.00898406	0.00722609	0.0070821	0.00692557	0.00677562	0.00663634	0.00648765	0.00632766	0.00616579	0.00601804		231.238	231.241	231.242	231.239	231.234	231.226	231.213	231.197	231.179		0.500741	0.49078	0.479945	0.469559	0.459907	0.449595	0.438495	0.427258	0.416997
528	0.00549706	0.00905785	0.00706238	0.00689894	0.00672126	0.00655105	0.00639296	0.00622417	0.00604257	0.00585884	0.00569112		233.173	233.176	233.177	233.174	233.17	233.161	233.149	233.132	233.114		0.493505	0.482102	0.4697	0.457811	0.446764	0.434964	0.422262	0.409405	0.397665
529	0.00563043	0.00898392	0.00710462	0.0069507	0.00678336	0.00662306	0.00647417	0.00631521	0.00614419	0.00597115	0.0058132		234.494	234.497	234.498	234.495	234.49	234.482	234.469	234.452	234.434		0.499265	0.488466	0.47672	0.46546	0.454997	0.44382	0.431788	0.419609	0.408488
530	0.00588975	0.00926041	0.00737149	0.00721678	0.00704858	0.00688747	0.00673781	0.00657804	0.00640614	0.00623221	0.00607345		235.022	235.024	235.025	235.023	235.018	235.009	234.996	234.98	234.962		0.519164	0.508285	0.496454	0.485112	0.474572	0.463312	0.451192	0.438923	0.427719
531	0.00581967	0.00917391	0.00729419	0.00714023	0.00697286	0.00681252	0.0066636	0.0065046	0.00633354	0.00616046	0.00600248		236.354	236.357	236.358	236.355	236.351	236.342	236.329	236.312	236.294		0.516639	0.505752	0.493911	0.48256	0.472012	0.460744	0.448614	0.436335	0.425123
532	0.00588565	0.00906349	0.00728263	0.00713676	0.00697819	0.00682629	0.00668519	0.00653456	0.00637249	0.00620852	0.00605884		238.72	238.723	238.724	238.721	238.716	238.707	238.694	238.677	238.659		0.520983	0.510566	0.499235	0.488373	0.478279	0.467496	0.455888	0.444136	0.433406
533	0.00566999	0.00872659	0.00701367	0.00687337	0.00672085	0.00657474	0.00643903	0.00629414	0.00613826	0.00598054	0.00583657		240.583	240.586	240.587	240.584	240.579	240.57	240.557	240.54	240.522		0.505678	0.495579	0.484595	0.474065	0.464279	0.453826	0.442573	0.431181	0.420778
534	0.005921	0.00833731	0.00698321	0.0068723	0.00675172	0.00663622	0.00652894	0.00641441	0.00629117	0.00616649	0.00605268		241.358	241.361	241.362	241.359	241.354	241.346	241.333	241.316	241.297		0.505107	0.497099	0.488389	0.480036	0.472274	0.46398	0.45505	0.446008	0.437751
535	0.0056727	0.0091139	0.00718545	0.0070275	0.00685579	0.0066913	0.00653851	0.00637539	0.00619989	0.00602233	0.00586025		242.037	242.04	242.041	242.038	242.033	242.024	242.011	241.994	241.976		0.521182	0.509743	0.497303	0.485377	0.474295	0.462458	0.449715	0.436816	0.425038
536	0.00608187	0.00911621	0.00741577	0.00727649	0.00712508	0.00698004	0.00684531	0.00670148	0.00654673	0.00639016	0.00624724		242.75	242.752	242.753	242.75	242.746	242.737	242.724	242.706	242.688		0.539452	0.529338	0.518337	0.50779	0.497989	0.487518	0.476246	0.464834	0.454413
537	0.00585163	0.00892678	0.00720347	0.00706232	0.00690887	0.00676188	0.00662534	0.00647958	0.00632274	0.00616407	0.00601923		242.74	242.743	242.744	242.741	242.736	242.727	242.714	242.697	242.678		0.524004	0.513754	0.502604	0.491916	0.481983	0.471372	0.459949	0.448385	0.437825
538	0.00581569	0.00863259	0.007054	0.00692471	0.00678414	0.00664949	0.00652442	0.0063909	0.00624724	0.00610189	0.00596921		242.878	242.881	242.882	242.879	242.874	242.865	242.852	242.835	242.817		0.513435	0.50404	0.493821	0.484024	0.474919	0.465192	0.454721	0.444119	0.434438
539	0.0057225	0.0088807	0.00711084	0.00696588	0.00680829	0.00665733	0.0065171	0.00636741	0.00620634	0.00604338	0.00589463		242.079	242.082	242.083	242.08	242.075	242.066	242.053	242.036	242.018		0.515865	0.505366	0.493946	0.482999	0.472826	0.461959	0.45026	0.438417	0.427603
540	0.00553244	0.0089403	0.00703054	0.00687412	0.00670407	0.00654117	0.00638986	0.00622833	0.00605453	0.00587868	0.00571817		241.195	241.198	241.199	241.196	241.191	241.182	241.169	241.152	241.134		0.508183	0.496894	0.484616	0.472847	0.46191	0.450228	0.437652	0.424922	0.413299
541	0.00572355	0.00855325	0.00696748	0.0068376	0.0066964	0.00656114	0.0064355	0.00630137	0.00615706	0.00601104	0.00587776		239.794	239.796	239.797	239.794	239.79	239.781	239.768	239.751	239.733		0.500704	0.491385	0.48125	0.471533	0.462503	0.452856	0.442471	0.431957	0.422356
542	0.00566217	0.00865383	0.0069773	0.00683999	0.0066907	0.0065477	0.00641487	0.00627307	0.00612049	0.00596612	0.00582522		239.505	239.508	239.509	239.506	239.501	239.492	239.479	239.462	239.444		0.500805	0.490965	0.480262	0.470002	0.460467	0.450281	0.439316	0.428215	0.418079
543	0.00552152	0.00861384	0.0068809	0.00673897	0.00658466	0.00643685	0.00629955	0.00615297	0.00599527	0.0058357	0.00569005		238.685	238.688	238.689	238.686	238.681	238.672	238.66	238.643	238.625		0.492202	0.482066	0.47104	0.460471	0.450649	0.440157	0.428863	0.417429	0.406989
544	0.00546583	0.00852222	0.00680942	0.00666913	0.00651662	0.00637052	0.00623482	0.00608994	0.00593407	0.00577636	0.0056324		237.611	237.613	237.614	237.612	237.607	237.598	237.585	237.569	237.551		0.484901	0.474927	0.464079	0.453679	0.444015	0.433691	0.422578	0.411328	0.401055
545	0.00555242	0.00858024	0.00688345	0.00674447	0.00659339	0.00644866	0.00631422	0.0061707	0.00601628	0.00586005	0.00571744		237.379	237.382	237.383	237.38	237.375	237.367	237.354	237.337	237.319		0.48969	0.479819	0.469083	0.458791	0.449226	0.439009	0.42801	0.416876	0.406708
546	0.00556072	0.00878621	0.00697864	0.00683059	0.00666964	0.00651546	0.00637225	0.00621936	0.00605486	0.00588843	0.0057365		235.444	235.446	235.447	235.444	235.44	235.431	235.419	235.402	235.384		0.492407	0.481977	0.470634	0.459759	0.449654	0.43886	0.42724	0.415477	0.404736
547	0.00537668	0.00834303	0.00668068	0.00654453	0.00639651	0.00625472	0.00612301	0.00598241	0.00583112	0.00567806	0.00553834		233.8	233.803	233.803	233.801	233.796	233.787	233.775	233.758	233.741		0.468113	0.458588	0.448228	0.438296	0.429066	0.419207	0.408593	0.397849	0.388038
548	0.00550916	0.00845302	0.00680328	0.00666816	0.00652126	0.00638054	0.00624983	0.0061103	0.00596016	0.00580826	0.0056696		232.647	232.65	232.651	232.648	232.644	232.635	232.623	232.606	232.589		0.474345	0.464939	0.454708	0.444901	0.435786	0.42605	0.415569	0.404958	0.395269
549	0.00565455	0.00882167	0.00704681	0.00690144	0.0067434	0.00659202	0.0064514	0.00630127	0.00613975	0.00597633	0.00582716		232.266	232.268	232.269	232.267	232.262	232.253	232.241	232.225	232.207		0.490501	0.480399	0.469411	0.458878	0.449089	0.438633	0.427377	0.415982	0.405577
550	0.00566396	0.00908642	0.00716848	0.00701138	0.0068406	0.00667701	0.00652505	0.00636283	0.00618828	0.00601168	0.00585049		231.161	231.164	231.164	231.162	231.157	231.149	231.136	231.12	231.102		0.496587	0.485722	0.473905	0.462577	0.452051	0.440807	0.428703	0.41645	0.405263
551	0.00545407	0.00869212	0.00687752	0.00672889	0.00656731	0.00641253	0.00626876	0.00611528	0.00595014	0.00578305	0.00563054		229.065	229.068	229.069	229.066	229.061	229.053	229.041	229.025	229.007		0.472132	0.461945	0.450865	0.440244	0.430374	0.419832	0.408482	0.396994	0.386504
552	0.0051338	0.00838509	0.00656307	0.00641383	0.00625159	0.00609618	0.00595182	0.00579771	0.00563189	0.00546413	0.00531099		227.95	227.953	227.954	227.951	227.946	227.938	227.926	227.91	227.892		0.448374	0.438193	0.427121	0.416508	0.406645	0.396111	0.384771	0.373292	0.362811
553	0.00547963	0.00854928	0.00682905	0.00668815	0.00653497	0.00638825	0.00625195	0.00610645	0.0059499	0.0057915	0.00564692		226.881	226.884	226.885	226.882	226.877	226.869	226.857	226.841	226.824		0.464339	0.454773	0.44437	0.434397	0.425129	0.415229	0.404572	0.393783	0.383932
554	0.00576459	0.00893633	0.00715889	0.00701331	0.00685504	0.00670343	0.0065626	0.00641226	0.0062505	0.00608684	0.00593745		225.862	225.865	225.866	225.863	225.859	225.851	225.838	225.823	225.806		0.484557	0.474719	0.464019	0.453761	0.444229	0.434046	0.423085	0.411988	0.401855
555	0.00542914	0.00870045	0.00686721	0.00671705	0.00655382	0.00639745	0.0062522	0.00609714	0.0059303	0.00576151	0.00560743		224.377	224.379	224.38	224.377	224.373	224.365	224.353	224.337	224.32		0.461776	0.451695	0.440731	0.43022	0.420453	0.41002	0.398789	0.387421	0.37704
556	0.00560802	0.00882197	0.00702087	0.00687335	0.00671298	0.00655935	0.00641665	0.00626431	0.0061004	0.00593456	0.00578318		222.9	222.902	222.903	222.9	222.896	222.888	222.876	222.86	222.843		0.468991	0.459152	0.448451	0.438193	0.428661	0.418478	0.407517	0.39642	0.386288
557	0.00581944	0.0087042	0.00708758	0.00695517	0.00681122	0.00667333	0.00654525	0.00640851	0.00626139	0.00611253	0.00597666		221.907	221.91	221.911	221.908	221.904	221.896	221.884	221.868	221.851		0.471334	0.462544	0.452982	0.443815	0.435297	0.426196	0.416399	0.40648	0.397423
558	0.00577159	0.00893662	0.00716294	0.00701766	0.00685973	0.00670844	0.00656791	0.00641789	0.00625647	0.00609316	0.00594408		220.708	220.711	220.712	220.709	220.705	220.697	220.685	220.67	220.653		0.473767	0.464174	0.45374	0.443738	0.434443	0.424513	0.413824	0.403004	0.393123
559	0.00563262	0.00900651	0.00711578	0.00696092	0.00679256	0.00663129	0.00648149	0.00632157	0.0061495	0.00597541	0.0058165		219.187	219.19	219.191	219.188	219.184	219.176	219.164	219.149	219.132		0.467407	0.457251	0.446205	0.435617	0.425777	0.415266	0.403952	0.392499	0.382041
560	0.00508697	0.00802217	0.00637728	0.00624256	0.00609609	0.00595579	0.00582547	0.00568634	0.00553664	0.00538519	0.00524694		217.807	217.81	217.811	217.808	217.804	217.796	217.784	217.769	217.752		0.416307	0.407525	0.397974	0.388818	0.38031	0.371221	0.361437	0.351534	0.34249
561	0.00570177	0.00834923	0.00686559	0.00674407	0.00661197	0.00648542	0.00636787	0.00624238	0.00610736	0.00597075	0.00584605		216.771	216.774	216.774	216.772	216.768	216.76	216.748	216.733	216.717		0.446019	0.438138	0.429565	0.421347	0.413709	0.405549	0.396764	0.38787	0.379748
562	0.00565867	0.0086321	0.00696579	0.00682931	0.00668094	0.00653881	0.00640679	0.00626585	0.0061142	0.00596077	0.00582073		216.028	216.03	216.031	216.029	216.024	216.016	216.005	215.99	215.973		0.45097	0.442148	0.432554	0.423355	0.414808	0.405676	0.395846	0.385895	0.376807
563	0.00534786	0.00858595	0.00677132	0.00662269	0.00646111	0.00630633	0.00616256	0.00600908	0.00584393	0.00567685	0.00552433		214.455	214.457	214.458	214.456	214.451	214.443	214.432	214.417	214.401		0.4352	0.425663	0.415289	0.405345	0.396104	0.386234	0.375609	0.364853	0.355032
564	0.00534631	0.00844951	0.00671048	0.00656804	0.00641319	0.00626486	0.00612708	0.00597999	0.00582172	0.0056616	0.00551544		212.463	212.465	212.466	212.463	212.459	212.451	212.44	212.425	212.409		0.427287	0.418232	0.408383	0.398941	0.390167	0.380795	0.370706	0.360494	0.351168
565	0.00548192	0.00816367	0.00666082	0.00653772	0.00640391	0.00627572	0.00615665	0.00602953	0.00589277	0.00575439	0.00562808		210.875	210.878	210.879	210.876	210.872	210.864	210.853	210.838	210.822		0.42096	0.413193	0.404745	0.396646	0.38912	0.381079	0.372423	0.363659	0.355657
566	0.00562299	0.00824751	0.00677673	0.00665626	0.0065253	0.00639985	0.00628332	0.00615892	0.00602507	0.00588964	0.00576603		210.042	210.045	210.046	210.043	210.039	210.031	210.02	210.005	209.99		0.426586	0.419016	0.410781	0.402886	0.39555	0.387711	0.379273	0.370729	0.362928
567	0.00534674	0.00819176	0.00659741	0.00646682	0.00632486	0.00618887	0.00606255	0.00592769	0.0057826	0.0056358	0.0055018		208.475	208.477	208.478	208.476	208.471	208.464	208.453	208.438	208.423		0.41221	0.404064	0.395203	0.386709	0.378816	0.370384	0.361306	0.352117	0.343726
568	0.00528192	0.00779264	0.00638563	0.00627039	0.00614511	0.0060251	0.00591362	0.00579461	0.00566657	0.00553701	0.00541876		206.954	206.957	206.958	206.955	206.951	206.943	206.932	206.918	206.902		0.396081	0.388944	0.381182	0.373739	0.366823	0.359435	0.35148	0.343427	0.336073
569	0.00518029	0.00717612	0.00605765	0.00596604	0.00586645	0.00577105	0.00568244	0.00558783	0.00548605	0.00538306	0.00528906		205.376	205.378	205.379	205.377	205.373	205.365	205.354	205.34	205.324		0.37289	0.36726	0.361136	0.355264	0.349807	0.343976	0.337697	0.33134	0.325534
570	0.00564968	0.00756317	0.00649085	0.00640302	0.00630754	0.00621607	0.00613111	0.00604041	0.00594282	0.00584409	0.00575396		203.763	203.766	203.767	203.764	203.76	203.753	203.742	203.728	203.712		0.396393	0.391039	0.385215	0.37963	0.374438	0.368891	0.362917	0.356868	0.351343
571	0.00536319	0.00806927	0.00655278	0.00642857	0.00629354	0.00616419	0.00604404	0.00591577	0.00577776	0.00563813	0.00551067		201.761	201.763	201.764	201.762	201.758	201.75	201.74	201.725	201.71		0.396239	0.38874	0.380583	0.372764	0.365498	0.357735	0.349378	0.340918	0.333192
572	0.00532726	0.00835766	0.00665942	0.00652032	0.00636911	0.00622425	0.0060897	0.00594606	0.00579151	0.00563514	0.00549241		200.355	200.358	200.359	200.356	200.352	200.345	200.334	200.32	200.305		0.399876	0.391536	0.382466	0.373771	0.365691	0.35706	0.347769	0.338364	0.329776
573	0.00522431	0.00760122	0.0062692	0.0061601	0.00604149	0.00592787	0.00582234	0.00570967	0.00558845	0.0054658	0.00535385		198.072	198.074	198.075	198.073	198.069	198.061	198.051	198.037	198.022		0.372175	0.365709	0.358675	0.351932	0.345665	0.338969	0.331761	0.324463	0.317799
574	0.00566323	0.00777024	0.00658947	0.00649276	0.00638762	0.0062869	0.00619335	0.00609348	0.00598602	0.0058773	0.00577806		196.403	196.405	196.406	196.404	196.4	196.393	196.382	196.369	196.354		0.387874	0.382192	0.37601	0.370083	0.364573	0.358687	0.352348	0.34593	0.340069
575	0.00584158	0.00862625	0.00706572	0.0069379	0.00679895	0.00666584	0.0065422	0.00641021	0.00626819	0.0061245	0.00599334		195.178	195.18	195.181	195.179	195.175	195.168	195.158	195.144	195.129		0.413284	0.405821	0.397702	0.389919	0.382687	0.374959	0.366641	0.358219	0.350528
576	0.00536764	0.00830848	0.00666043	0.00652545	0.0063787	0.00623813	0.00610756	0.00596816	0.00581818	0.00566643	0.00552792		193.918	193.921	193.921	193.919	193.915	193.908	193.898	193.884	193.87		0.387087	0.379255	0.370735	0.362569	0.354979	0.346872	0.338145	0.32931	0.321243
577	0.00528291	0.00735457	0.00619361	0.00609852	0.00599515	0.00589612	0.00580414	0.00570594	0.00560029	0.00549339	0.00539582		191.823	191.826	191.826	191.824	191.82	191.813	191.803	191.79	191.775		0.356093	0.350635	0.344698	0.339006	0.333715	0.328062	0.321975	0.315812	0.310184
578	0.00575485	0.00803642	0.00675783	0.00665311	0.00653926	0.0064302	0.0063289	0.00622075	0.00610439	0.00598666	0.0058792		190.08	190.083	190.083	190.081	190.077	190.07	190.06	190.047	190.033		0.384969	0.379013	0.372536	0.366324	0.360551	0.354383	0.347742	0.341018	0.334877
579	0.00600433	0.00891376	0.00728332	0.00714977	0.00700459	0.00686552	0.00673634	0.00659843	0.00645005	0.00629993	0.00616289		188.057	188.06	188.06	188.058	188.054	188.048	188.038	188.024	188.01		0.410456	0.402943	0.394771	0.386936	0.379656	0.371878	0.363504	0.355026	0.347285
580	0.00577491	0.00863837	0.00703369	0.00690225	0.00675937	0.00662249	0.00649536	0.00635963	0.00621359	0.00606584	0.00593097		186.175	186.177	186.178	186.175	186.172	186.165	186.155	186.142	186.128		0.392434	0.385113	0.37715	0.369516	0.362422	0.354843	0.346684	0.338424	0.330882
581	0.00545517	0.00732683	0.00627795	0.00619204	0.00609864	0.00600918	0.00592608	0.00583736	0.0057419	0.00564533	0.00555717		184.745	184.747	184.748	184.745	184.742	184.735	184.725	184.712	184.698		0.347618	0.342869	0.337704	0.33275	0.328146	0.323226	0.317928	0.312564	0.307664
582	0.00588099	0.00811187	0.00686169	0.00675929	0.00664797	0.00654133	0.00644228	0.00633654	0.00622276	0.00610765	0.00600258		181.934	181.936	181.937	181.934	181.931	181.924	181.915	181.902	181.888		0.374126	0.368553	0.362491	0.356678	0.351275	0.345502	0.339287	0.332993	0.327245
583	0.00621645	0.00945404	0.0076397	0.00749109	0.00732953	0.00717478	0.00703103	0.00687757	0.00671245	0.00654539	0.0063929		180.208	180.21	180.211	180.209	180.205	180.199	180.189	180.177	180.163		0.412548	0.404537	0.395824	0.387471	0.379708	0.371415	0.362488	0.353451	0.345198
584	0.00587728	0.00883243	0.00717636	0.00704072	0.00689326	0.00675201	0.0066208	0.00648072	0.00633001	0.00617752	0.00603834		178.034	178.036	178.036	178.034	178.031	178.024	178.015	178.002	177.989		0.382878	0.375653	0.367795	0.360261	0.353261	0.345781	0.33773	0.329579	0.322136
585	0.00562013	0.00816434	0.00673857	0.00662179	0.00649483	0.00637322	0.00626026	0.00613966	0.00600991	0.00587863	0.00575879		175.438	175.44	175.441	175.439	175.435	175.429	175.42	175.407	175.394		0.354302	0.348172	0.341505	0.335112	0.329172	0.322825	0.315992	0.309074	0.302756
586	0.00597778	0.00847367	0.00707497	0.00696041	0.00683586	0.00671656	0.00660574	0.00648744	0.00636015	0.00623136	0.0061138		173.846	173.848	173.849	173.847	173.843	173.837	173.828	173.816	173.803		0.368595	0.362637	0.356157	0.349943	0.344168	0.337998	0.331355	0.324629	0.318486
587	0.00603128	0.00856419	0.00714475	0.00702848	0.00690209	0.00678102	0.00666856	0.0065485	0.00641932	0.00628862	0.00616932		171.956	171.958	171.958	171.956	171.953	171.947	171.938	171.926	171.913		0.368179	0.362199	0.355694	0.349456	0.34366	0.337466	0.330798	0.324047	0.317881
588	0.00631544	0.00919433	0.007581	0.00744886	0.0073052	0.00716759	0.00703977	0.00690331	0.00675648	0.00660793	0.00647234		169.741	169.743	169.744	169.742	169.738	169.732	169.723	169.711	169.699		0.385604	0.378894	0.371597	0.3646	0.358097	0.35115	0.343671	0.336099	0.329185
589	0.00609543	0.00924259	0.00747892	0.00733447	0.00717743	0.00702699	0.00688726	0.00673808	0.00657758	0.00641518	0.00626695		167.423	167.425	167.426	167.424	167.42	167.414	167.405	167.394	167.381		0.375222	0.367987	0.360117	0.352573	0.345563	0.338073	0.330011	0.321848	0.314395
590	0.00603943	0.0091006	0.00738512	0.00724461	0.00709186	0.00694554	0.00680962	0.00666452	0.0065084	0.00635044	0.00620626		165.079	165.081	165.081	165.079	165.076	165.07	165.061	165.05	165.037		0.365333	0.358394	0.350847	0.343611	0.336887	0.329704	0.321971	0.314143	0.306994
591	0.00617732	0.00890494	0.00737638	0.00725118	0.00711507	0.00698469	0.00686359	0.0067343	0.00659519	0.00645444	0.00632597		163.506	163.508	163.509	163.507	163.504	163.498	163.489	163.478	163.465		0.361425	0.355302	0.348641	0.342255	0.33632	0.329979	0.323153	0.316241	0.309929
592	0.006355	0.00851404	0.00730411	0.00720501	0.00709728	0.00699408	0.00689822	0.00679588	0.00668577	0.00657436	0.00647267		161.192	161.194	161.194	161.192	161.189	161.183	161.175	161.164	161.152		0.352822	0.348045	0.342847	0.337863	0.33323	0.32828	0.322949	0.317551	0.312621
593	0.00634219	0.00836216	0.00723017	0.00713745	0.00703665	0.0069401	0.00685041	0.00675466	0.00665165	0.00654741	0.00645227		157.887	157.889	157.889	157.888	157.884	157.879	157.87	157.859	157.848		0.342094	0.337716	0.332953	0.328385	0.324139	0.319601	0.314715	0.309767	0.305247
594	0.00627987	0.00867322	0.00733199	0.00722213	0.00710271	0.0069883	0.00688204	0.00676859	0.00664653	0.00652304	0.00641031		155.323	155.325	155.326	155.324	155.321	155.315	155.307	155.296	155.285		0.341274	0.33617	0.330618	0.325294	0.320347	0.31506	0.309368	0.303604	0.29834
595	0.00624394	0.00851903	0.00724407	0.00713964	0.00702612	0.00691737	0.00681635	0.00670852	0.00659249	0.00647509	0.00636794		153.461	153.462	153.463	153.461	153.458	153.453	153.444	153.434	153.422		0.333142	0.328348	0.323134	0.318134	0.313487	0.308521	0.303174	0.29776	0.292815
596	0.00659802	0.00896644	0.00763918	0.00753047	0.00741228	0.00729907	0.00719392	0.00708165	0.00696086	0.00683865	0.0067271		151.603	151.604	151.605	151.603	151.6	151.595	151.587	151.576	151.565		0.347038	0.342109	0.336747	0.331606	0.326827	0.32172	0.316222	0.310654	0.305569
597	0.00678071	0.00916681	0.00782964	0.00772012	0.00760105	0.00748699	0.00738105	0.00726795	0.00714626	0.00702314	0.00691075		149.525	149.527	149.527	149.525	149.522	149.517	149.509	149.499	149.488		0.350805	0.345908	0.340581	0.335472	0.330724	0.32565	0.320186	0.314654	0.309601
598	0.00628932	0.00815347	0.0071088	0.00702323	0.00693021	0.00684111	0.00675834	0.00666998	0.0065749	0.00647871	0.00639091		148.327	148.329	148.329	148.327	148.324	148.319	148.311	148.301	148.29		0.315991	0.312195	0.308065	0.304105	0.300423	0.296489	0.292251	0.28796	0.28404
599	0.0064204	0.00789907	0.00707042	0.00700255	0.00692876	0.00685808	0.00679243	0.00672234	0.00664693	0.00657063	0.00650098		146.557	146.558	146.559	146.557	146.554	146.549	146.541	146.531	146.52		0.310535	0.307561	0.304325	0.30122	0.298334	0.295248	0.291924	0.288556	0.285479
600	0.00667049	0.00813819	0.00731569	0.00724832	0.00717508	0.00710493	0.00703976	0.00697019	0.00689534	0.00681961	0.00675048		145.732	145.733	145.734	145.732	145.729	145.724	145.716	145.706	145.695		0.319488	0.316552	0.313359	0.310294	0.307445	0.304399	0.301118	0.297793	0.294755
601	0.00699848	0.00884354	0.00780957	0.00772488	0.00763281	0.00754462	0.00746269	0.00737524	0.00728114	0.00718593	0.00709903		144.437	144.439	144.439	144.437	144.435	144.429	144.422	144.412	144.401		0.338001	0.334344	0.330365	0.326548	0.323	0.319207	0.315122	0.310985	0.307205
602	0.00729338	0.00898366	0.00803642	0.00795884	0.00787449	0.0077937	0.00771865	0.00763853	0.00755233	0.00746511	0.0073855		142.42	142.422	142.422	142.42	142.418	142.413	142.405	142.395	142.385		0.34295	0.339648	0.336054	0.332606	0.3294	0.325973	0.322282	0.318542	0.315125
603	0.00688079	0.00842113	0.00755793	0.00748722	0.00741036	0.00733673	0.00726834	0.00719533	0.00711677	0.00703729	0.00696474		139.473	139.474	139.475	139.473	139.47	139.465	139.458	139.448	139.438		0.315879	0.312931	0.309723	0.306646	0.303784	0.300725	0.29743	0.294091	0.291041
604	0.00716229	0.00862719	0.00780626	0.00773902	0.00766592	0.0075959	0.00753086	0.00746142	0.00738671	0.00731112	0.00724212		137.69	137.692	137.692	137.691	137.688	137.683	137.676	137.666	137.656		0.322076	0.319309	0.316297	0.313408	0.310721	0.307848	0.304753	0.301617	0.298751
605	0.00703621	0.00873578	0.00778334	0.00770533	0.00762052	0.00753928	0.00746382	0.00738326	0.00729658	0.00720888	0.00712883		135.788	135.79	135.791	135.789	135.786	135.781	135.774	135.765	135.755		0.316696	0.31353	0.310084	0.306778	0.303705	0.30042	0.296881	0.293297	0.290022
606	0.00728046	0.00900039	0.00803654	0.0079576	0.00787177	0.00778956	0.0077132	0.00763167	0.00754396	0.00745521	0.0073742		132.588	132.589	132.59	132.588	132.585	132.581	132.574	132.564	132.555		0.319279	0.31615	0.312745	0.309479	0.306443	0.303196	0.2997	0.296157	0.292921
607	0.0073471	0.00905579	0.00809824	0.00801981	0.00793455	0.00785287	0.007777	0.00769601	0.00760887	0.0075207	0.00744022		130.011	130.012	130.013	130.011	130.009	130.004	129.997	129.988	129.978		0.315474	0.312426	0.30911	0.305928	0.30297	0.299807	0.296401	0.29295	0.289797
608	0.00724119	0.00905956	0.00804055	0.00795709	0.00786635	0.00777943	0.00769869	0.0076125	0.00751977	0.00742594	0.00734029		127.752	127.753	127.754	127.752	127.75	127.745	127.739	127.73	127.72		0.307787	0.3046	0.301132	0.297805	0.294712	0.291405	0.287844	0.284237	0.280942
609	0.0071605	0.00850596	0.00775197	0.00769021	0.00762307	0.00755876	0.00749902	0.00743525	0.00736663	0.0072972	0.00723383		125.587	125.588	125.589	125.587	125.585	125.58	125.574	125.565	125.555		0.291724	0.289406	0.286883	0.284462	0.282211	0.279804	0.27721	0.274581	0.272179
610	0.00711861	0.00875697	0.00783883	0.00776363	0.00768188	0.00760356	0.00753082	0.00745316	0.0073696	0.00728506	0.0072079		123.831	123.832	123.833	123.831	123.829	123.825	123.818	123.809	123.8		0.290865	0.288081	0.285052	0.282146	0.279444	0.276556	0.273445	0.270292	0.267413
611	0.0074338	0.00910262	0.00816741	0.00809081	0.00800754	0.00792777	0.00785367	0.00777457	0.00768946	0.00760335	0.00752475		122.045	122.047	122.047	122.046	122.043	122.039	122.033	122.024	122.015		0.298672	0.295878	0.292837	0.28992	0.287208	0.284308	0.281185	0.27802	0.275129
612	0.00729257	0.00911704	0.00809461	0.00801086	0.00791982	0.00783261	0.00775161	0.00766513	0.00757208	0.00747793	0.007392		119.82	119.822	119.822	119.821	119.818	119.814	119.808	119.799	119.79		0.290616	0.287617	0.284353	0.281222	0.278312	0.2752	0.271849	0.268454	0.265353
613	0.00700403	0.00867404	0.00773817	0.00766151	0.00757818	0.00749835	0.0074242	0.00734505	0.00725988	0.0071737	0.00709505		116.892	116.893	116.893	116.892	116.89	116.886	116.879	116.871	116.863		0.271043	0.268365	0.26545	0.262654	0.260054	0.257275	0.254282	0.25125	0.248479
614	0.00717423	0.00845736	0.0077383	0.0076794	0.00761537	0.00755404	0.00749707	0.00743625	0.00737081	0.0073046	0.00724416		114.544	114.546	114.546	114.545	114.542	114.538	114.532	114.524	114.516		0.265605	0.263589	0.261395	0.259289	0.25733	0.255236	0.252979	0.250691	0.248601
615	0.0070895	0.00897632	0.00791895	0.00783234	0.00773819	0.007648	0.00756423	0.00747479	0.00737856	0.0072812	0.00719233		112.028	112.03	112.03	112.029	112.026	112.022	112.017	112.009	112		0.265828	0.262927	0.259771	0.256744	0.25393	0.250922	0.247682	0.244401	0.241403
616	0.00755016	0.00953806	0.00842404	0.0083328	0.0082336	0.00813858	0.00805032	0.00795609	0.00785471	0.00775213	0.0076585		109.164	109.166	109.166	109.165	109.163	109.159	109.153	109.145	109.137		0.275533	0.272556	0.269316	0.266209	0.26332	0.260232	0.256907	0.253538	0.250461
617	0.00720952	0.00904802	0.00801772	0.00793333	0.00784159	0.00775371	0.00767208	0.00758494	0.00749117	0.00739631	0.00730971		106.823	106.825	106.825	106.824	106.822	106.818	106.812	106.805	106.797		0.256635	0.25394	0.251008	0.248195	0.245581	0.242786	0.239775	0.236726	0.23394
618	0.00705822	0.00921481	0.00800626	0.00790727	0.00779965	0.00769657	0.00760082	0.00749859	0.00738861	0.00727733	0.00717575		104.84	104.841	104.841	104.84	104.838	104.834	104.829	104.822	104.814		0.25151	0.248407	0.245031	0.241794	0.238784	0.235568	0.232105	0.228597	0.225393
619	0.00722561	0.00907163	0.00803712	0.00795239	0.00786027	0.00777203	0.00769007	0.00760257	0.00750842	0.00741317	0.00732622		102.86	102.861	102.862	102.86	102.858	102.855	102.849	102.842	102.835		0.247711	0.245105	0.242271	0.239551	0.237023	0.234321	0.23141	0.228462	0.225768
620	0.00713814	0.00967528	0.00825346	0.00813701	0.00801041	0.00788913	0.00777648	0.00765622	0.00752683	0.00739591	0.00727641		100.617	100.619	100.619	100.618	100.616	100.612	100.607	100.6	100.592		0.248824	0.245321	0.241509	0.237854	0.234457	0.230827	0.226919	0.222961	0.219346
621	0.00746168	0.00963826	0.0084185	0.0083186	0.00820999	0.00810595	0.00800931	0.00790614	0.00779513	0.00768282	0.0075803		98.363	98.3642	98.3646	98.3634	98.3615	98.358	98.3528	98.346	98.3387		0.248107	0.24517	0.241974	0.238908	0.236058	0.233013	0.229733	0.226411	0.223377
622	0.00723637	0.00902432	0.00802235	0.00794028	0.00785106	0.0077656	0.00768621	0.00760147	0.00751028	0.00741802	0.00733381		96.0832	96.0843	96.0847	96.0836	96.0817	96.0782	96.0732	96.0666	96.0594		0.230966	0.228609	0.226044	0.223583	0.221296	0.218851	0.216217	0.213549	0.211112
623	0.00693704	0.00861541	0.00767485	0.00759781	0.00751406	0.00743384	0.00735932	0.00727976	0.00719417	0.00710756	0.00702851		94.1371	94.1383	94.1386	94.1375	94.1357	94.1323	94.1274	94.1208	94.1139		0.216497	0.214329	0.21197	0.209707	0.207603	0.205354	0.202931	0.200477	0.198235
624	0.00708026	0.0088429	0.00785512	0.00777421	0.00768626	0.007602	0.00752374	0.00744019	0.0073503	0.00725935	0.00717633		91.9372	91.9383	91.9387	91.9376	91.9358	91.9325	91.9277	91.9213	91.9145		0.216398	0.214175	0.211755	0.209434	0.207276	0.20497	0.202485	0.199969	0.19767
625	0.00734996	0.00958148	0.00833094	0.00822851	0.00811716	0.00801049	0.00791141	0.00780564	0.00769183	0.00757669	0.00747158		90.0235	90.0246	90.0249	90.0239	90.0221	90.0189	90.0141	90.0079	90.0012		0.224713	0.221956	0.218957	0.216081	0.213407	0.21055	0.207473	0.204356	0.20151
626	0.00715181	0.0100123	0.00840929	0.00827799	0.00813525	0.00799852	0.00787151	0.00773592	0.00759004	0.00744244	0.00730771		88.1032	88.1043	88.1046	88.1036	88.1018	88.0987	88.094	88.088	88.0814		0.221985	0.218526	0.214764	0.211156	0.207803	0.20422	0.200363	0.196457	0.19289
627	0.00754088	0.00954182	0.0084205	0.00832865	0.00822881	0.00813316	0.00804432	0.00794947	0.00784743	0.00774418	0.00764993		86.183	86.184	86.1844	86.1833	86.1816	86.1785	86.174	86.1681	86.1617		0.217436	0.21507	0.212496	0.210027	0.207731	0.205277	0.202635	0.199958	0.197513
628	0.00721683	0.0100633	0.00846812	0.00833747	0.00819543	0.00805937	0.00793299	0.00779807	0.0076529	0.00750603	0.00737196		84.241	84.242	84.2423	84.2413	84.2397	84.2366	84.2322	84.2264	84.2202		0.213737	0.210446	0.206866	0.203434	0.200243	0.196835	0.193165	0.189448	0.186054
629	0.00752437	0.00948039	0.00838424	0.00829445	0.00819685	0.00810335	0.0080165	0.00792379	0.00782403	0.0077231	0.00763097		82.3381	82.3391	82.3394	82.3384	82.3368	82.3338	82.3295	82.3238	82.3177		0.206842	0.204633	0.202228	0.199922	0.197778	0.195486	0.193018	0.190518	0.188234
630	0.00740275	0.00999232	0.00854113	0.00842227	0.00829305	0.00816927	0.00805429	0.00793154	0.00779948	0.00766585	0.00754389		80.4544	80.4554	80.4557	80.4547	80.4531	80.4502	80.446	80.4405	80.4345		0.205887	0.203028	0.199918	0.196935	0.194163	0.191201	0.188011	0.184781	0.181831
631	0.00755473	0.0104597	0.00883174	0.00869841	0.00855345	0.00841459	0.00828562	0.00814792	0.00799977	0.00784987	0.00771305		78.6868	78.6877	78.688	78.6871	78.6856	78.6827	78.6786	78.6732	78.6674		0.208207	0.20507	0.201657	0.198386	0.195345	0.192095	0.188597	0.185054	0.181819
632	0.00748002	0.0104219	0.00877329	0.00863825	0.00849145	0.00835083	0.00822021	0.00808076	0.00793072	0.00777892	0.00764035		76.8631	76.864	76.8643	76.8634	76.8619	76.8591	76.8551	76.8498	76.8441		0.202037	0.198933	0.195558	0.192321	0.189313	0.186098	0.182638	0.179133	0.175933
633	0.00765086	0.0104989	0.00890286	0.00877213	0.00863001	0.00849388	0.00836742	0.00823243	0.00808718	0.00794022	0.00780608		74.4199	74.4208	74.421	74.4202	74.4187	74.416	74.4121	74.407	74.4015		0.1985	0.195591	0.192427	0.189393	0.186574	0.183561	0.180316	0.177031	0.174031
634	0.00805996	0.0100998	0.00895668	0.00886305	0.00876126	0.00866376	0.00857319	0.0084765	0.00837247	0.00826721	0.00817114		73.2377	73.2385	73.2388	73.238	73.2365	73.2339	73.2301	73.225	73.2196		0.196526	0.194476	0.192247	0.190108	0.188119	0.185994	0.183704	0.181385	0.179266
635	0.00794596	0.0100642	0.00887713	0.00877991	0.00867421	0.00857296	0.00847891	0.0083785	0.00827047	0.00816117	0.00806141		71.2125	71.2133	71.2136	71.2128	71.2113	71.2088	71.2051	71.2002	71.1949		0.189396	0.187327	0.185076	0.182916	0.180908	0.178762	0.176451	0.17411	0.171971
636	0.00763978	0.0104022	0.00885416	0.00872736	0.00858952	0.00845747	0.00833482	0.00820387	0.00806299	0.00792045	0.00779033		69.6958	69.6966	69.6969	69.6961	69.6947	69.6922	69.6886	69.6838	69.6786		0.184884	0.182242	0.179368	0.176612	0.17405	0.171313	0.168366	0.165381	0.162656
637	0.00777753	0.0104737	0.00896277	0.00883902	0.00870448	0.0085756	0.00845589	0.00832809	0.00819058	0.00805146	0.00792447		67.872	67.8728	67.8731	67.8723	67.871	67.8685	67.865	67.8603	67.8553		0.182251	0.17974	0.177009	0.174389	0.171955	0.169353	0.166551	0.163715	0.161124
638	0.0068706	0.0105647	0.00849452	0.00832496	0.00814063	0.00796405	0.00780003	0.00762493	0.00743653	0.00724592	0.00707193		65.9972	65.9979	65.9982	65.9974	65.9961	65.9938	65.9903	65.9858	65.9809		0.16797	0.164623	0.160983	0.157494	0.154251	0.150787	0.147058	0.143282	0.139835
639	0.00734417	0.0103085	0.00864727	0.00851121	0.00836329	0.0082216	0.00808999	0.00794948	0.0077983	0.00764534	0.00750572		64.1511	64.1519	64.1521	64.1514	64.1501	64.1478	64.1445	64.14	64.1353		0.166204	0.163594	0.160755	0.158033	0.155503	0.1528	0.14989	0.146943	0.144252
640	0.00803325	0.0105537	0.00914125	0.00902556	0.00889979	0.00877931	0.0086674	0.00854793	0.00841938	0.00828933	0.00817061		62.6137	62.6145	62.6147	62.614	62.6127	62.6105	62.6072	62.6029	62.5983		0.171475	0.16931	0.166954	0.164695	0.162595	0.160351	0.157935	0.155487	0.153252
641	0.00801171	0.0109944	0.00932288	0.00918598	0.00903715	0.00889457	0.00876214	0.00862077	0.00846865	0.00831475	0.00817426		61.2559	61.2567	61.2569	61.2562	61.255	61.2528	61.2496	61.2454	61.2408		0.171085	0.168578	0.165851	0.163236	0.160806	0.158209	0.155413	0.152582	0.149996
642	0.00781583	0.0107668	0.00911307	0.00897762	0.00883037	0.00868931	0.00855829	0.00841841	0.00826791	0.00811564	0.00797665		59.9552	59.9559	59.9562	59.9555	59.9543	59.9521	59.949	59.9449	59.9405		0.163689	0.161261	0.15862	0.156088	0.153734	0.15122	0.148512	0.14577	0.143266
643	0.00724202	0.00980809	0.00837007	0.00825229	0.00812424	0.00800158	0.00788765	0.00776601	0.00763514	0.00750274	0.00738187		58.477	58.4777	58.4779	58.4772	58.476	58.474	58.4709	58.4669	58.4626		0.146653	0.144593	0.142353	0.140205	0.138208	0.136074	0.133777	0.13145	0.129326
644	0.007465	0.00988237	0.00852768	0.00841672	0.00829609	0.00818054	0.00807321	0.00795863	0.00783534	0.00771061	0.00759675		56.7186	56.7193	56.7195	56.7188	56.7177	56.7157	56.7127	56.7088	56.7046		0.144918	0.143036	0.14099	0.139027	0.137202	0.135252	0.133153	0.131026	0.129084
645	0.00775531	0.0100333	0.00875673	0.00865216	0.00853849	0.0084296	0.00832846	0.00822048	0.0081043	0.00798676	0.00787946		55.7575	55.7581	55.7583	55.7577	55.7566	55.7546	55.7517	55.7478	55.7437		0.146284	0.144541	0.142645	0.140826	0.139136	0.137329	0.135384	0.133413	0.131614
646	0.00745158	0.0102011	0.00866028	0.00853407	0.00839687	0.00826544	0.00814336	0.00801303	0.00787281	0.00773093	0.00760143		54.023	54.0237	54.0239	54.0232	54.0222	54.0202	54.0174	54.0137	54.0097		0.140174	0.138136	0.135918	0.133792	0.131816	0.129704	0.12743	0.125128	0.123025
647	0.0074002	0.00983123	0.00846888	0.00835729	0.00823599	0.00811978	0.00801185	0.00789661	0.00777263	0.00764719	0.00753269		53.0233	53.0239	53.0241	53.0235	53.0224	53.0205	53.0178	53.0141	53.0102		0.134543	0.132774	0.13085	0.129005	0.127289	0.125456	0.123482	0.121483	0.119658
648	0.00773567	0.00900928	0.00829555	0.00823709	0.00817354	0.00811266	0.00805611	0.00799574	0.00793079	0.00786507	0.00780508		51.5095	51.5101	51.5103	51.5097	51.5087	51.5069	51.5042	51.5007	51.4969		0.128031	0.127131	0.126152	0.125212	0.124338	0.123403	0.122395	0.121374	0.12044
649	0.00708661	0.00959846	0.00819082	0.00807553	0.00795018	0.00783012	0.00771859	0.00759953	0.00747143	0.00734181	0.00722351		50.2114	50.212	50.2122	50.2116	50.2106	50.2088	50.2062	50.2028	50.1991		0.12323	0.121499	0.119616	0.11781	0.116132	0.114339	0.112408	0.110452	0.108666
650	0.00714899	0.010114	0.00845239	0.0083163	0.00816835	0.00802662	0.00789497	0.00775444	0.00760322	0.00745023	0.00731058		49.0371	49.0377	49.0379	49.0373	49.0363	49.0346	49.032	49.0287	49.025		0.124187	0.122191	0.12002	0.117939	0.116005	0.113938	0.111713	0.10946	0.107403
651	0.00738061	0.0103	0.00866399	0.00852999	0.00838431	0.00824476	0.00811513	0.00797675	0.00782786	0.00767722	0.00753971		47.9015	47.9021	47.9023	47.9017	47.9008	47.899	47.8966	47.8933	47.8897		0.124344	0.122425	0.120337	0.118335	0.116474	0.114487	0.112346	0.110179	0.1082
652	0.00745476	0.0106706	0.00886843	0.00872082	0.00856035	0.00840664	0.00826386	0.00811143	0.00794742	0.00778149	0.00763002		46.4336	46.4341	46.4343	46.4338	46.4329	46.4312	46.4288	46.4256	46.4222		0.123374	0.121324	0.119095	0.116958	0.114972	0.11285	0.110565	0.108252	0.106139
653	0.00752008	0.00704241	0.0073101	0.00733202	0.00735586	0.00737869	0.0073999	0.00742254	0.0074469	0.00747155	0.00749405		45.2694	45.27	45.2702	45.2696	45.2687	45.2671	45.2648	45.2617	45.2583		0.0991684	0.0994667	0.0997901	0.100098	0.100384	0.100687	0.101012	0.101339	0.101636
654	0.00637332	-0.0121499	-0.0017695	-0.000919285	5.02539e-06	0.000890437	0.00171287	0.00259087	0.00353556	0.00449136	0.0053638		44.4092	44.4098	44.4099	44.4094	44.4085	44.4069	44.4046	44.4016	44.3983		-0.0235809	-0.0122493	6.69531e-05	0.0118616	0.0228139	0.0345024	0.0470736	0.0597867	0.0713857
655	0.00752712	0.00493847	0.00638915	0.00650797	0.00663714	0.00676088	0.00687581	0.00699851	0.00713054	0.00726411	0.00738603		43.1822	43.1828	43.1829	43.1824	43.1816	43.18	43.1778	43.1748	43.1716		0.08269	0.0842273	0.0858978	0.0874965	0.0889807	0.0905637	0.0922655	0.0939855	0.0955542
656	0.00739409	0.00644758	0.006978	0.00702145	0.00706868	0.00711392	0.00715594	0.00720081	0.00724908	0.00729792	0.0073425		42.0038	42.0043	42.0045	42.004	42.0032	42.0017	41.9995	41.9966	41.9935		0.0878388	0.0883862	0.0889804	0.0895483	0.090075	0.0906358	0.091238	0.0918458	0.0923994
657	0.00768309	0.0103075	0.00883679	0.00871633	0.00858537	0.00845992	0.0083434	0.008219	0.00808515	0.00794973	0.00782612		40.8393	40.8398	40.84	40.8395	40.8387	40.8372	40.8351	40.8323	40.8293		0.108123	0.106652	0.105053	0.103518	0.102092	0.100568	0.0989274	0.0972657	0.0957481
658	0.00866703	0.0142996	0.0111431	0.0108846	0.0106035	0.0103343	0.0100842	0.0098172	0.00952994	0.0092393	0.00897401		39.8312	39.8316	39.8318	39.8313	39.8305	39.8291	39.8271	39.8243	39.8214		0.132931	0.129853	0.126506	0.123297	0.120315	0.117131	0.113702	0.110232	0.107063
659	0.00961096	0.0174264	0.0130466	0.0126879	0.0122979	0.0119243	0.0115773	0.0112069	0.0108083	0.010405	0.0100369		38.9008	38.9013	38.9014	38.901	38.9002	38.8988	38.8968	38.8941	38.8913		0.15196	0.147791	0.143257	0.138912	0.134874	0.130561	0.125918	0.121219	0.116928
660	0.00973558	0.0169086	0.0128889	0.0125596	0.0122017	0.0118588	0.0115403	0.0112003	0.0108345	0.0104644	0.0101265		37.533	37.5334	37.5336	37.5331	37.5324	37.5311	37.5291	37.5265	37.5238		0.144847	0.141156	0.137141	0.133292	0.129716	0.125896	0.121785	0.117623	0.113823
661	0.00949134	0.0162058	0.012443	0.0121348	0.0117998	0.0114788	0.0111807	0.0108624	0.01052	0.0101735	0.00985728		36.773	36.7735	36.7736	36.7732	36.7725	36.7711	36.7692	36.7667	36.764		0.137015	0.133629	0.129946	0.126416	0.123136	0.119632	0.115861	0.112043	0.108557
662	0.00900811	0.0160161	0.0120888	0.0117672	0.0114175	0.0110825	0.0107713	0.0104391	0.0100817	0.00972012	0.00939005		35.7346	35.735	35.7351	35.7347	35.734	35.7327	35.7309	35.7284	35.7258		0.129362	0.125927	0.122192	0.118611	0.115284	0.111731	0.107905	0.104034	0.100498
663	0.00872672	0.0119955	0.0101637	0.0100137	0.00985054	0.00969429	0.00954915	0.00939421	0.0092275	0.00905883	0.00890487		34.4375	34.4379	34.438	34.4376	34.4369	34.4357	34.4339	34.4316	34.429		0.104844	0.103299	0.10162	0.100009	0.0985119	0.0969123	0.0951899	0.0934459	0.0918531
664	0.00773975	0.00991338	0.00869528	0.00859551	0.00848704	0.00838314	0.00828663	0.0081836	0.00807275	0.00796059	0.00785821		33.3973	33.3977	33.3978	33.3974	33.3968	33.3956	33.3938	33.3915	33.3891		0.0870061	0.0860101	0.0849264	0.0838871	0.0829209	0.0818883	0.0807762	0.0796498	0.0786209
665	0.00689743	0.00891315	0.00778354	0.00769102	0.00759044	0.00749408	0.00740459	0.00730904	0.00720624	0.00710223	0.00700729		32.519	32.5193	32.5195	32.5191	32.5185	32.5173	32.5156	32.5134	32.511		0.0758452	0.0749456	0.0739668	0.0730281	0.0721555	0.071223	0.0702187	0.0692015	0.0682724
666	0.00768078	0.0095377	0.00849708	0.00841185	0.00831919	0.00823043	0.00814798	0.00805996	0.00796526	0.00786944	0.00778198		31.6386	31.639	31.6391	31.6388	31.6381	31.637	31.6354	31.6332	31.6309		0.0805481	0.0797421	0.0788651	0.0780238	0.0772416	0.0764055	0.0755049	0.0745926	0.0737591
667	0.00783219	0.00944216	0.00853993	0.00846603	0.0083857	0.00830874	0.00823726	0.00816094	0.00807883	0.00799576	0.00791993		30.6396	30.6399	30.6401	30.6397	30.6391	30.638	30.6364	30.6343	30.6321		0.0783975	0.0777209	0.0769846	0.0762781	0.0756211	0.0749187	0.074162	0.0733953	0.0726947
668	0.00825062	0.011405	0.00963728	0.00949249	0.00933509	0.00918431	0.00904426	0.00889474	0.00873387	0.00857111	0.00842254		29.4915	29.4919	29.492	29.4916	29.491	29.49	29.4885	29.4864	29.4843		0.0851422	0.0838659	0.0824775	0.0811462	0.0799089	0.0785869	0.0771634	0.075722	0.0744057
669	0.00865462	0.00921302	0.00890009	0.00887446	0.0088466	0.0088199	0.00879511	0.00876864	0.00874017	0.00871135	0.00868505		28.7301	28.7305	28.7306	28.7303	28.7297	28.7287	28.7272	28.7252	28.7231		0.076608	0.0763885	0.0761493	0.075919	0.0757043	0.0754741	0.0752254	0.0749726	0.0747411
670	0.00871728	0.00828555	0.00852749	0.00854731	0.00856885	0.00858949	0.00860866	0.00862912	0.00865114	0.00867342	0.00869375		27.6071	27.6074	27.6075	27.6072	27.6066	27.6057	27.6042	27.6023	27.6003		0.0705355	0.0707	0.0708782	0.0710479	0.0712048	0.0713714	0.0715495	0.0717286	0.0718913
671	0.00758484	0.00822837	0.00786773	0.0078382	0.00780608	0.00777532	0.00774675	0.00771625	0.00768343	0.00765022	0.00761991		26.8249	26.8253	26.8254	26.825	26.8245	26.8236	26.8222	26.8203	26.8184		0.0632408	0.0630044	0.0627468	0.0624991	0.0622685	0.0620214	0.0617547	0.0614839	0.061236
672	0.00696386	0.00848691	0.00763339	0.00756348	0.00748748	0.00741468	0.00734706	0.00727487	0.00719719	0.0071186	0.00704686		26.0618	26.0621	26.0622	26.0619	26.0614	26.0605	26.0591	26.0574	26.0554		0.0596138	0.0590691	0.0584765	0.0579078	0.0573792	0.0568139	0.0562051	0.0555882	0.0550246
673	0.00759695	0.00948098	0.00842517	0.00833869	0.00824468	0.00815462	0.00807097	0.00798167	0.00788559	0.00778837	0.00769963		25.2727	25.273	25.2731	25.2728	25.2723	25.2714	25.2701	25.2683	25.2665		0.0637973	0.063144	0.0624332	0.0617514	0.0611175	0.0604399	0.0597101	0.0589708	0.0582954
674	0.00816987	0.00993152	0.00894429	0.00886343	0.00877552	0.00869132	0.0086131	0.0085296	0.00843975	0.00834885	0.00826588		24.6188	24.6191	24.6192	24.6189	24.6184	24.6176	24.6163	24.6146	24.6128		0.0659708	0.065376	0.0647287	0.0641076	0.0635302	0.0629128	0.0622478	0.0615739	0.0609583
675	0.00812711	0.00996427	0.00893473	0.0088504	0.00875872	0.00867091	0.00858934	0.00850226	0.00840856	0.00831376	0.00822723		23.6851	23.6854	23.6855	23.6852	23.6848	23.6839	23.6827	23.6811	23.6793		0.0634011	0.0628042	0.0621548	0.0615317	0.0609524	0.0603331	0.0596659	0.0589901	0.0583726
676	0.00842291	0.00986202	0.00905554	0.00898949	0.00891768	0.00884889	0.00878499	0.00871678	0.00864339	0.00856913	0.00850135		23.09	23.0903	23.0904	23.0901	23.0897	23.0889	23.0877	23.0861	23.0844		0.0626427	0.0621871	0.0616913	0.0612153	0.0607727	0.0602993	0.0597891	0.0592721	0.0587995
677	0.00763298	0.00869211	0.00809858	0.00804996	0.00799711	0.00794649	0.00789946	0.00784926	0.00779524	0.00774059	0.00769071		22.431	22.4312	22.4313	22.4311	22.4306	22.4298	22.4287	22.4271	22.4255		0.0544315	0.0541058	0.0537512	0.0534107	0.053094	0.0527551	0.0523897	0.0520193	0.0516807
678	0.00788714	0.00956855	0.00862629	0.00854911	0.00846521	0.00838484	0.00831018	0.00823048	0.00814473	0.00805797	0.00797878		21.8295	21.8297	21.8298	21.8295	21.8291	21.8283	21.8272	21.8257	21.8241		0.0564191	0.0559157	0.0553678	0.0548422	0.0543534	0.0538309	0.0532679	0.0526976	0.0521765
679	0.00780013	0.00900193	0.00832844	0.00827327	0.00821331	0.00815586	0.0081025	0.00804553	0.00798424	0.00792223	0.00786562		21.2238	21.2241	21.2242	21.2239	21.2235	21.2228	21.2217	21.2202	21.2186		0.0529622	0.0526125	0.0522318	0.0518663	0.0515264	0.0511627	0.0507708	0.0503735	0.0500103
680	0.00789229	0.0093947	0.00855275	0.00848379	0.00840882	0.008337	0.00827029	0.00819908	0.00812246	0.00804493	0.00797417		20.8085	20.8087	20.8088	20.8086	20.8082	20.8074	20.8064	20.8049	20.8034		0.0533225	0.0528938	0.0524271	0.0519793	0.0515629	0.0511177	0.0506379	0.0501518	0.0497075
681	0.00871666	0.00941163	0.00902217	0.00899027	0.00895559	0.00892237	0.00889151	0.00885857	0.00882313	0.00878727	0.00875453		20.2665	20.2667	20.2668	20.2666	20.2662	20.2654	20.2644	20.263	20.2615		0.0547801	0.0545873	0.0543773	0.0541752	0.053987	0.0537854	0.0535677	0.0533466	0.0531442
682	0.00868034	0.00991196	0.00922176	0.00916523	0.00910377	0.0090449	0.00899021	0.00893184	0.00886902	0.00880547	0.00874746		19.6276	19.6279	19.6279	19.6277	19.6273	19.6266	19.6256	19.6243	19.6228		0.0542253	0.053894	0.0535333	0.053187	0.0528648	0.0525201	0.0521486	0.0517718	0.0514275
683	0.00842778	0.00957849	0.00893363	0.00888081	0.00882339	0.00876839	0.0087173	0.00866275	0.00860407	0.00854469	0.00849049		19.0709	19.0711	19.0712	19.071	19.0706	19.0699	19.0689	19.0676	19.0662		0.0510433	0.0507425	0.050415	0.0501006	0.0498081	0.0494951	0.0491576	0.0488155	0.0485027
684	0.00747104	0.00899143	0.00813941	0.00806962	0.00799375	0.00792108	0.00785357	0.00778151	0.00770397	0.00762551	0.0075539		18.8435	18.8438	18.8438	18.8436	18.8432	18.8426	18.8416	18.8403	18.8389		0.0459564	0.0455634	0.0451357	0.0447253	0.0443438	0.0439358	0.0434962	0.0430508	0.0426439
685	0.00815219	0.0092381	0.00862956	0.00857971	0.00852553	0.00847362	0.00842541	0.00837393	0.00831855	0.00826252	0.00821137		18.2494	18.2496	18.2497	18.2495	18.2491	18.2485	18.2475	18.2463	18.2449		0.0471842	0.0469125	0.0466168	0.0463328	0.0460686	0.0457859	0.0454811	0.0451721	0.0448895
686	0.00817272	0.00945893	0.00873814	0.0086791	0.00861492	0.00855344	0.00849633	0.00843537	0.00836977	0.0083034	0.00824282		17.4604	17.4606	17.4607	17.4605	17.4601	17.4595	17.4586	17.4574	17.4561		0.0457115	0.0454036	0.0450684	0.0447467	0.0444474	0.0441273	0.0437823	0.0434326	0.043113
687	0.00857712	0.00974125	0.00908887	0.00903543	0.00897734	0.0089217	0.00887001	0.00881483	0.00875546	0.00869539	0.00864056		16.7964	16.7966	16.7967	16.7965	16.7962	16.7956	16.7947	16.7936	16.7923		0.0457358	0.0454678	0.0451761	0.0448959	0.0446353	0.0443564	0.0440558	0.0437509	0.0434722
688	0.00864378	0.0103002	0.00937193	0.0092959	0.00921325	0.00913407	0.00906053	0.00898202	0.00889754	0.00881207	0.00873405		16.5032	16.5034	16.5035	16.5033	16.503	16.5024	16.5015	16.5004	16.4992		0.046335	0.0459601	0.0455522	0.0451608	0.0447968	0.0444075	0.0439882	0.0435632	0.0431749
689	0.00848872	0.0105774	0.00940688	0.00931101	0.00920679	0.00910695	0.00901422	0.00891522	0.0088087	0.00870092	0.00860255		15.9165	15.9167	15.9168	15.9166	15.9163	15.9157	15.9149	15.9138	15.9127		0.0448542	0.0443982	0.0439021	0.0434262	0.0429837	0.0425108	0.0420014	0.0414853	0.0410139
690	0.00813562	0.0101249	0.00901012	0.00891881	0.00881955	0.00872446	0.00863613	0.00854184	0.00844038	0.00833773	0.00824404		15.3791	15.3793	15.3793	15.3792	15.3789	15.3783	15.3775	15.3765	15.3753		0.0415141	0.0410945	0.0406378	0.0401998	0.0397926	0.0393573	0.0388884	0.0384134	0.0379795
691	0.0084151	0.0102087	0.00920355	0.00912122	0.00903173	0.00894599	0.00886636	0.00878134	0.00868987	0.00859732	0.00851285		14.7589	14.759	14.7591	14.7589	14.7586	14.7581	14.7573	14.7563	14.7553		0.040694	0.0403309	0.0399359	0.0395569	0.0392044	0.0388276	0.0384217	0.0380105	0.0376347
692	0.00875398	0.00996168	0.00928488	0.00922945	0.00916919	0.00911146	0.00905784	0.00900059	0.008939	0.00887668	0.0088198		14.2551	14.2552	14.2553	14.2551	14.2548	14.2543	14.2536	14.2526	14.2516		0.0396517	0.0394158	0.0391589	0.0389123	0.0386828	0.0384373	0.0381727	0.0379043	0.037659
693	0.00936794	0.00994204	0.00962031	0.00959396	0.00956531	0.00953787	0.00951238	0.00948517	0.00945589	0.00942627	0.00939923		13.8501	13.8503	13.8503	13.8502	13.8499	13.8494	13.8487	13.8477	13.8467		0.0399151	0.0398064	0.0396878	0.0395737	0.0394673	0.0393531	0.0392298	0.0391044	0.0389895
694	0.00886193	0.00967129	0.00921773	0.00918058	0.00914019	0.0091015	0.00906557	0.00902721	0.00898593	0.00894416	0.00890604		13.5637	13.5639	13.5639	13.5637	13.5635	13.563	13.5623	13.5614	13.5604		0.0374561	0.0373058	0.0371421	0.0369846	0.0368381	0.0366811	0.0365117	0.0363398	0.0361824
695	0.00880149	0.00957625	0.00914207	0.00910651	0.00906785	0.00903082	0.00899642	0.0089597	0.00892018	0.00888021	0.00884372		12.9722	12.9724	12.9724	12.9723	12.972	12.9715	12.9709	12.97	12.969		0.0355291	0.0353915	0.0352416	0.0350975	0.0349633	0.0348195	0.0346644	0.0345069	0.0343627
696	0.0091746	0.0102803	0.00966065	0.0096099	0.00955473	0.00950188	0.00945279	0.00940038	0.00934399	0.00928694	0.00923486		12.6515	12.6517	12.6517	12.6516	12.6513	12.6509	12.6502	12.6493	12.6484		0.0366135	0.0364218	0.0362132	0.0360127	0.0358262	0.0356266	0.0354114	0.0351931	0.0349934
697	0.00903449	0.0092618	0.00913442	0.00912398	0.00911264	0.00910178	0.00909168	0.00908091	0.00906932	0.00905759	0.00904688		12.2791	12.2793	12.2793	12.2792	12.2789	12.2785	12.2779	12.277	12.2761		0.0336027	0.0335648	0.0335233	0.0334829	0.0334452	0.0334045	0.0333601	0.0333148	0.033273
698	0.00891286	0.00984419	0.00932227	0.00927952	0.00923305	0.00918853	0.00914718	0.00910304	0.00905554	0.00900748	0.00896362		11.9872	11.9873	11.9874	11.9872	11.987	11.9866	11.9859	11.9851	11.9842		0.0334774	0.0333245	0.033158	0.032998	0.032849	0.0326895	0.0325175	0.032343	0.0321833
699	0.00961007	0.00995516	0.00976177	0.00974593	0.00972871	0.00971222	0.00969689	0.00968054	0.00966294	0.00964513	0.00962887		11.48	11.4801	11.4802	11.48	11.4798	11.4794	11.4788	11.478	11.4772		0.0335703	0.0335163	0.0334573	0.0334003	0.033347	0.0332897	0.0332275	0.0331641	0.0331059
700	0.0101424	0.010212	0.010173	0.0101698	0.0101663	0.010163	0.0101599	0.0101566	0.0101531	0.0101495	0.0101462		11.0311	11.0313	11.0313	11.0312	11.031	11.0306	11.03	11.0293	11.0284		0.0336146	0.0336044	0.0335931	0.0335818	0.0335709	0.0335588	0.0335454	0.0335313	0.033518
701	0.00996904	0.0112277	0.0105223	0.0104646	0.0104018	0.0103416	0.0102857	0.010226	0.0101619	0.0100969	0.0100376		10.8245	10.8246	10.8246	10.8245	10.8243	10.8239	10.8234	10.8226	10.8218		0.0341157	0.0339291	0.0337259	0.0335308	0.0333492	0.0331549	0.0329454	0.0327329	0.0325387
702	0.00959905	0.0107972	0.0101257	0.0100708	0.010011	0.0099537	0.0099005	0.00984371	0.00978261	0.00972078	0.00966435		10.3452	10.3453	10.3454	10.3452	10.345	10.3447	10.3441	10.3434	10.3427		0.0313782	0.0312084	0.0310235	0.0308459	0.0306807	0.0305039	0.0303133	0.0301199	0.0299432
703	0.010162	0.0107592	0.0104246	0.0103972	0.0103674	0.0103388	0.0103123	0.010284	0.0102535	0.0102227	0.0101946		10.127	10.1271	10.1271	10.127	10.1268	10.1264	10.1259	10.1252	10.1245		0.0316213	0.0315386	0.0314485	0.0313617	0.0312807	0.0311939	0.0311001	0.0310046	0.0309172
704	0.00953388	0.0115164	0.0104054	0.0103144	0.0102155	0.0101207	0.0100327	0.00993871	0.0098376	0.0097353	0.00964192		9.78895	9.78906	9.7891	9.78899	9.78879	9.78845	9.78794	9.78728	9.78656		0.0305097	0.0302437	0.0299542	0.0296764	0.0294181	0.0291419	0.0288444	0.0285429	0.0282675
705	0.010954	0.0110969	0.0110168	0.0110102	0.0110031	0.0109963	0.0109899	0.0109832	0.0109759	0.0109685	0.0109618		9.53074	9.53085	9.53089	9.53077	9.53059	9.53025	9.52976	9.52911	9.52841		0.0314475	0.0314291	0.0314089	0.0313891	0.0313704	0.03135	0.0313276	0.0313045	0.031283
706	0.0107881	0.0090878	0.0100407	0.0101187	0.0102036	0.0102848	0.0103603	0.0104409	0.0105276	0.0106154	0.0106955		9.31797	9.31808	9.31811	9.318	9.31782	9.31749	9.31701	9.31638	9.3157		0.0280253	0.0282432	0.0284797	0.0287059	0.0289157	0.0291393	0.0293794	0.0296219	0.0298428
707	0.0102577	0.00893955	0.00967823	0.00973874	0.00980451	0.00986752	0.00992604	0.00998852	0.0100557	0.0101238	0.0101858		9.04552	9.04562	9.04566	9.04555	9.04537	9.04505	9.04459	9.04397	9.04331		0.0262253	0.0263893	0.0265674	0.0267375	0.0268954	0.0270634	0.0272439	0.027426	0.027592
708	0.0105591	0.00989776	0.0102683	0.0102987	0.0103317	0.0103633	0.0103927	0.010424	0.0104577	0.0104919	0.010523		8.7435	8.74361	8.74364	8.74354	8.74337	8.74306	8.74261	8.74201	8.74137		0.026893	0.0269727	0.027059	0.0271414	0.0272176	0.0272986	0.0273854	0.0274728	0.0275522
709	0.0107436	0.0109345	0.0108275	0.0108188	0.0108092	0.0108001	0.0107916	0.0107826	0.0107729	0.010763	0.010754		8.4249	8.425	8.42503	8.42493	8.42477	8.42447	8.42404	8.42346	8.42285		0.0273218	0.0273001	0.0272762	0.0272529	0.027231	0.0272072	0.0271813	0.0271547	0.02713
710	0.0113583	0.0113427	0.0113515	0.0113522	0.011353	0.0113537	0.0113544	0.0113551	0.0113559	0.0113568	0.0113575		8.23263	8.23273	8.23276	8.23266	8.2325	8.23221	8.23179	8.23123	8.23063		0.027988	0.0279901	0.0279921	0.0279937	0.0279948	0.0279957	0.0279962	0.0279963	0.0279961
711	0.0116728	0.010988	0.0113718	0.0114032	0.0114374	0.0114701	0.0115005	0.011533	0.0115679	0.0116032	0.0116355		8.08689	8.08698	8.08702	8.08692	8.08676	8.08648	8.08606	8.08551	8.08492		0.0275417	0.027618	0.0277007	0.0277795	0.0278525	0.02793	0.028013	0.0280965	0.0281724
712	0.0130203	0.0113245	0.0122748	0.0123527	0.0124373	0.0125183	0.0125936	0.012674	0.0127605	0.012848	0.0129278		7.80235	7.80244	7.80247	7.80238	7.80223	7.80195	7.80155	7.80102	7.80045		0.0286789	0.0288607	0.0290582	0.0292469	0.0294219	0.0296082	0.0298083	0.0300103	0.0301943
713	0.0125559	0.0108766	0.0118177	0.0118948	0.0119786	0.0120588	0.0121334	0.012213	0.0122986	0.0123853	0.0124644		7.4633	7.46339	7.46342	7.46333	7.46318	7.46292	7.46254	7.46203	7.46148		0.0264128	0.0265851	0.0267721	0.0269509	0.0271167	0.0272933	0.0274829	0.0276743	0.0278487
714	0.0122289	0.0105465	0.0114893	0.0115666	0.0116505	0.0117309	0.0118056	0.0118854	0.0119712	0.012058	0.0121372		7.2321	7.23219	7.23222	7.23213	7.23199	7.23174	7.23136	7.23087	7.23034		0.0248847	0.025052	0.0252336	0.0254072	0.0255682	0.0257397	0.0259238	0.0261097	0.026279
715	0.0124147	0.0116784	0.012091	0.0121248	0.0121615	0.0121967	0.0122294	0.0122643	0.0123019	0.0123399	0.0123745		6.96994	6.97002	6.97005	6.96997	6.96983	6.96959	6.96923	6.96875	6.96824		0.0252363	0.025307	0.0253836	0.0254567	0.0255243	0.0255961	0.025673	0.0257504	0.0258207
716	0.0128515	0.0124391	0.0126702	0.0126891	0.0127097	0.0127294	0.0127477	0.0127673	0.0127883	0.0128096	0.012829		6.72811	6.72819	6.72821	6.72814	6.728	6.72777	6.72742	6.72696	6.72647		0.0255254	0.0255638	0.0256053	0.0256446	0.0256809	0.0257193	0.0257603	0.0258013	0.0258384
717	0.0133422	0.0124146	0.0129344	0.012977	0.0130233	0.0130676	0.0131088	0.0131528	0.0132001	0.013248	0.0132917		6.52574	6.52582	6.52584	6.52577	6.52564	6.52541	6.52507	6.52463	6.52415		0.025273	0.0253563	0.0254467	0.0255328	0.0256126	0.0256975	0.0257884	0.02588	0.0259633
718	0.0149554	0.0116998	0.0135242	0.0136737	0.0138361	0.0139917	0.0141363	0.0142906	0.0144566	0.0146246	0.014778		6.31112	6.3112	6.31122	6.31115	6.31103	6.3108	6.31048	6.31005	6.30959		0.0255541	0.0258361	0.0261425	0.0264357	0.0267077	0.0269976	0.0273092	0.027624	0.027911
719	0.0154464	0.01112	0.0135445	0.0137431	0.013959	0.0141658	0.0143579	0.0145629	0.0147836	0.0150068	0.0152106		6.10838	6.10845	6.10847	6.1084	6.10828	6.10807	6.10775	6.10734	6.10689		0.0247701	0.0251329	0.0255269	0.025904	0.026254	0.0266272	0.0270284	0.0274337	0.0278034
720	0.0150879	0.0110573	0.013316	0.013501	0.0137022	0.0138948	0.0140738	0.0142648	0.0144704	0.0146784	0.0148682		5.85352	5.85358	5.85361	5.85354	5.85342	5.85322	5.85292	5.85252	5.85209		0.023337	0.0236609	0.0240127	0.0243494	0.0246619	0.024995	0.0253532	0.025715	0.0260449
721	0.0151523	0.0118464	0.013699	0.0138508	0.0140157	0.0141737	0.0143205	0.0144772	0.0146458	0.0148164	0.0149721		5.68546	5.68553	5.68555	5.68548	5.68537	5.68517	5.68488	5.68449	5.68408		0.0233176	0.0235756	0.0238559	0.024124	0.0243729	0.0246381	0.0249231	0.0252111	0.0254735
722	0.0155738	0.01191	0.0139632	0.0141314	0.0143142	0.0144893	0.014652	0.0148256	0.0150125	0.0152015	0.0153741		5.42091	5.42097	5.42099	5.42093	5.42082	5.42063	5.42035	5.41999	5.41959		0.0226605	0.0229331	0.0232292	0.0235125	0.0237754	0.0240558	0.024357	0.0246613	0.0249388
723	0.0161297	0.0125884	0.0145729	0.0147355	0.0149122	0.0150815	0.0152387	0.0154065	0.0155871	0.0157699	0.0159367		5.1912	5.19126	5.19128	5.19122	5.19112	5.19094	5.19067	5.19032	5.18994		0.0226458	0.0228981	0.0231721	0.0234343	0.0236776	0.023937	0.0242157	0.0244972	0.0247539
724	0.0172315	0.0125541	0.0151753	0.01539	0.0156234	0.015847	0.0160547	0.0162764	0.0165149	0.0167563	0.0169766		5.04904	5.0491	5.04912	5.04906	5.04896	5.04879	5.04853	5.04818	5.04782		0.022934	0.023258	0.02361	0.0239468	0.0242594	0.0245927	0.024951	0.025313	0.0256431
725	0.0188865	0.0123135	0.015997	0.0162987	0.0166267	0.0169409	0.0172328	0.0175443	0.0178795	0.0182187	0.0185283		4.97521	4.97527	4.97529	4.97523	4.97513	4.97496	4.9747	4.97436	4.974		0.0238194	0.0242678	0.024755	0.0252213	0.0256542	0.0261159	0.0266122	0.0271138	0.0275712
726	0.0188093	0.0118597	0.0157542	0.0160732	0.01642	0.0167522	0.0170608	0.0173902	0.0177446	0.0181032	0.0184305		4.83561	4.83567	4.83569	4.83563	4.83554	4.83537	4.83512	4.83479	4.83444		0.0228005	0.0232613	0.023762	0.0242413	0.0246861	0.0251607	0.0256708	0.0261864	0.0266566
727	0.0187139	0.0132983	0.0163332	0.0165818	0.016852	0.0171109	0.0173513	0.017608	0.0178842	0.0181637	0.0184187		4.74275	4.74281	4.74282	4.74277	4.74268	4.74251	4.74227	4.74194	4.7416		0.0231824	0.0235346	0.0239173	0.0242835	0.0246234	0.0249858	0.0253754	0.0257691	0.026128
728	0.0199473	0.0135397	0.0171305	0.0174246	0.0177444	0.0180506	0.0183351	0.0186389	0.0189657	0.0192963	0.0195981		4.58553	4.58559	4.5856	4.58555	4.58546	4.5853	4.58506	4.58475	4.58442		0.0235053	0.0239081	0.0243457	0.0247645	0.0251533	0.0255679	0.0260136	0.026464	0.0268747
729	0.0206822	0.0142047	0.0178347	0.018132	0.0184552	0.0187648	0.0190524	0.0193595	0.0196898	0.0200241	0.0203291		4.33812	4.33817	4.33818	4.33813	4.33805	4.3379	4.33767	4.33738	4.33706		0.0231487	0.0235338	0.0239523	0.0243527	0.0247244	0.0251208	0.0255469	0.0259775	0.0263701
730	0.0217545	0.0140561	0.0183703	0.0187236	0.0191078	0.0194757	0.0198176	0.0201825	0.0205751	0.0209723	0.0213349		4.28807	4.28812	4.28814	4.28809	4.28801	4.28786	4.28764	4.28734	4.28703		0.0235669	0.0240192	0.0245107	0.0249811	0.0254177	0.0258834	0.026384	0.02689	0.0273514
731	0.0232436	0.0142095	0.0192722	0.0196869	0.0201377	0.0205695	0.0209706	0.0213989	0.0218596	0.0223258	0.0227513		4.10222	4.10227	4.10228	4.10224	4.10216	4.10201	4.1018	4.10152	4.10122		0.0236493	0.0241569	0.0247085	0.0252364	0.0257264	0.0262492	0.0268111	0.0273791	0.0278971
732	0.0245915	0.0147474	0.020264	0.0207159	0.0212071	0.0216777	0.0221147	0.0225814	0.0230834	0.0235914	0.024055		4.03578	4.03583	4.03584	4.0358	4.03572	4.03558	4.03537	4.03509	4.0348		0.02446	0.025004	0.0255951	0.0261608	0.026686	0.0272462	0.0278485	0.0284572	0.0290124
733	0.0256288	0.0150241	0.020967	0.0214537	0.0219829	0.0224898	0.0229607	0.0234633	0.0240042	0.0245514	0.0250508		3.85851	3.85855	3.85857	3.85852	3.85845	3.85831	3.85811	3.85785	3.85757		0.0241942	0.0247543	0.025363	0.0259456	0.0264864	0.0270633	0.0276834	0.0283103	0.028882
734	0.0267753	0.0159243	0.0220052	0.0225033	0.0230447	0.0235634	0.0240452	0.0245595	0.025113	0.0256729	0.026184		3.75829	3.75833	3.75834	3.7583	3.75823	3.75809	3.7579	3.75765	3.75737		0.0247288	0.025287	0.0258934	0.0264738	0.0270127	0.0275874	0.0282052	0.0288297	0.0293992
735	0.0268453	0.0172723	0.022637	0.0230764	0.0235541	0.0240117	0.0244368	0.0248905	0.0253788	0.0258727	0.0263236		3.57272	3.57276	3.57278	3.57274	3.57267	3.57254	3.57236	3.57212	3.57186		0.0241805	0.0246486	0.0251571	0.0256438	0.0260956	0.0265774	0.0270953	0.0276188	0.0280962
736	0.0275663	0.0180996	0.0234047	0.0238392	0.0243116	0.0247641	0.0251845	0.0256332	0.026116	0.0266045	0.0270503		3.61299	3.61303	3.61304	3.613	3.61293	3.6128	3.61262	3.61237	3.61211		0.0252794	0.0257474	0.0262558	0.0267424	0.027194	0.0276757	0.0281935	0.0287168	0.029194
737	0.0283114	0.0185701	0.0240291	0.0244762	0.0249623	0.0254279	0.0258605	0.0263222	0.026819	0.0273217	0.0277805		3.42581	3.42585	3.42586	3.42583	3.42576	3.42564	3.42546	3.42523	3.42498		0.024607	0.0250634	0.0255594	0.0260341	0.0264747	0.0269446	0.0274497	0.0279601	0.0284257
738	0.0292272	0.0193748	0.0248961	0.0253483	0.0258399	0.0263109	0.0267483	0.0272153	0.0277178	0.0282262	0.0286902		3.3583	3.35834	3.35836	3.35832	3.35825	3.35813	3.35796	3.35773	3.35749		0.0249892	0.0254416	0.0259333	0.0264037	0.0268405	0.0273062	0.0278068	0.0283128	0.0287741
739	0.0300861	0.019097	0.0252553	0.0257597	0.026308	0.0268333	0.0273212	0.0278421	0.0284026	0.0289696	0.0294872		3.28068	3.28072	3.28073	3.28069	3.28063	3.28051	3.28034	3.28012	3.27988		0.0247624	0.0252553	0.0257909	0.0263035	0.0267793	0.0272868	0.0278323	0.0283836	0.0288864
740	0.0307627	0.0201918	0.0261157	0.0266009	0.0271284	0.0276337	0.028103	0.0286041	0.0291432	0.0296887	0.0301866		3.16246	3.16249	3.1625	3.16247	3.16241	3.16229	3.16213	3.16192	3.16169		0.0246801	0.0251371	0.0256337	0.0261088	0.0265499	0.0270203	0.0275259	0.0280369	0.0285029
741	0.0307131	0.0212111	0.026536	0.0269721	0.0274463	0.0279005	0.0283224	0.0287728	0.0292574	0.0297477	0.0301952		3.03622	3.03626	3.03627	3.03624	3.03618	3.03607	3.03591	3.03571	3.03549		0.0240748	0.0244692	0.0248977	0.0253077	0.0256882	0.0260941	0.0265303	0.0269711	0.027373
742	0.030993	0.0214993	0.0268196	0.0272553	0.0277291	0.0281829	0.0286044	0.0290544	0.0295386	0.0300284	0.0304756		2.95429	2.95432	2.95433	2.9543	2.95424	2.95414	2.95399	2.95379	2.95357		0.0236745	0.0240578	0.0244743	0.0248729	0.0252428	0.0256373	0.0260613	0.0264898	0.0268805
743	0.0311635	0.0226442	0.0274184	0.0278095	0.0282346	0.0286418	0.0290201	0.0294239	0.0298584	0.030298	0.0306992		2.82468	2.82471	2.82472	2.82469	2.82463	2.82453	2.82439	2.8242	2.82399		0.0231392	0.0234681	0.0238254	0.0241673	0.0244846	0.0248229	0.0251865	0.0255539	0.0258889
744	0.0305419	0.0217292	0.0266679	0.0270724	0.0275121	0.0279334	0.0283246	0.0287424	0.0291918	0.0296465	0.0300616		2.70855	2.70858	2.70859	2.70856	2.7085	2.70841	2.70827	2.70809	2.70789		0.0215829	0.0219092	0.0222637	0.0226029	0.0229177	0.0232534	0.0236142	0.0239788	0.0243113
745	0.0308601	0.0227021	0.0272739	0.0276483	0.0280554	0.0284454	0.0288076	0.0291943	0.0296103	0.0300313	0.0304155		2.62189	2.62192	2.62193	2.6219	2.62185	2.62175	2.62162	2.62144	2.62125		0.0213652	0.0216575	0.0219752	0.022279	0.0225611	0.0228618	0.023185	0.0235115	0.0238092
746	0.031469	0.0217779	0.0272088	0.0276537	0.0281372	0.0286005	0.0290308	0.0294901	0.0299844	0.0304844	0.0309409		2.58783	2.58786	2.58787	2.58784	2.58779	2.58769	2.58756	2.58739	2.5872		0.0210375	0.0213803	0.0217527	0.022109	0.0224398	0.0227924	0.0231715	0.0235546	0.0239039
747	0.0317129	0.0212092	0.0270955	0.0275776	0.0281017	0.0286038	0.0290701	0.029568	0.0301037	0.0306457	0.0311404		2.46352	2.46355	2.46356	2.46353	2.46348	2.4634	2.46327	2.4631	2.46293		0.0199439	0.0202975	0.0206818	0.0210494	0.0213907	0.0217547	0.0221459	0.0225413	0.0229018
748	0.0308409	0.0220898	0.0269939	0.0273956	0.0278323	0.0282506	0.0286392	0.029054	0.0295003	0.0299518	0.030364		2.46864	2.46867	2.46868	2.46865	2.4686	2.46851	2.46839	2.46822	2.46804		0.0199107	0.020206	0.0205269	0.0208338	0.0211187	0.0214225	0.021749	0.022079	0.0223798
749	0.0307058	0.0225375	0.027115	0.0274899	0.0278975	0.028288	0.0286507	0.0290378	0.0294544	0.0298759	0.0302606		2.40063	2.40066	2.40066	2.40064	2.40059	2.40051	2.40038	2.40022	2.40005		0.0194487	0.0197167	0.0200079	0.0202866	0.0205451	0.0208208	0.0211171	0.0214165	0.0216895
750	0.0308024	0.0225986	0.027196	0.0275725	0.0279819	0.028374	0.0287383	0.0291272	0.0295455	0.0299689	0.0303553		2.23556	2.23559	2.23559	2.23557	2.23553	2.23545	2.23533	2.23518	2.23502		0.0181653	0.018416	0.0186883	0.0189489	0.0191907	0.0194486	0.0197257	0.0200057	0.020261
												Sum	46009.5	46010.1	46010.2	46009.7	46008.7	46007	46004.5	46001.2	45997.7		108.099	106.082	103.888	101.784	99.8295	97.7412	95.493	93.2169	91.1384	Power in microwatts
																																99.6968	Average
																																5.80972	SD
																																18.6092	percent rise from 11% to 64% methanol

## Sheet: Specific heat
	Mole and Volume Fraction Methanol
	0.4396	0.3937	0.3438	0.296	0.2516	0.2042	0.1532	0.1016	0.0545
	0.637254	0.592537	0.539876	0.484962	0.429511	0.364937	0.288338	0.202084	0.114329
	2.454	2.576	2.719	2.868	3.018	3.284	3.402	3.636	3.874	Sp heat	J/(g.K)
	40.7498	38.8199	36.7782	34.8675	33.1345	30.4507	29.3945	27.5028	25.8131	Rel Temp rise
										-36.6546	Percent change in specific heat
										57.8647	Percent increase in temperature
